# Supplementary material
Source: publisher site journal article supplement (https://zoologia.pensoft.net/article/46392/download/suppl/31/)
Supplement: Supplementary file 1

## Sheet: taxonomy
Supplementary 1. List of Trichoptera species recorded to Brazil until August 2019, indicating endemic species to the country and respective distributional record through biomes, hydrographic regions, and Brazilian states. These data were available at Santos et al. 2019 http://fauna.jbrj.gov.br/fauna/faunadobrasil/278 [accessed on 02 September 2019]
Family	Genus	Species	Author	Year	Endemic to Brazil
Anomalopsychidae	Contulma	fluminensis	Holzenthal & Robertson	2006	x
Anomalopsychidae	Contulma	meloi	Holzenthal & Robertson	2006	x		Santos APM, Dumas LL, Henriques-Oliveira A, Souza WRM, Camargos LM, Calor AR, Pes AMO (2020)
Anomalopsychidae	Contulma	sana	Jardim & Nessimian	2011	x
Anomalopsychidae	Contulma	tijuca	Holzenthal & Flint	1995	x
Anomalopsychidae	Contulma	tripui	Holzenthal & Robertson	2006	x
Anomalopsychidae	Contulma	vascaina	Dumas	2018	x
Atriplectididae	Neoatriplectides	desiderata	Dumas & Nessimian	2008	x
Calamoceratidae	Phylloicus	abdominalis	(Ulmer)	1905
Calamoceratidae	Phylloicus	amazonas	Prather	2003
Calamoceratidae	Phylloicus	angustior	Ulmer	1905
Calamoceratidae	Phylloicus	auratus	Prather	2003
Calamoceratidae	Phylloicus	bertioga	Prather	2003	x
Calamoceratidae	Phylloicus	bidigitatus	Prather	2003	x
Calamoceratidae	Phylloicus	brevior	Banks	1915
Calamoceratidae	Phylloicus	bromeliarum	Müller	1880
Calamoceratidae	Phylloicus	camargoi	Quinteiro & Calor	2011	x
Calamoceratidae	Phylloicus	dumasi	Santos & Nessimian	2010	x
Calamoceratidae	Phylloicus	elektoros	Prather	2003
Calamoceratidae	Phylloicus	fenestratus	Flint	1974
Calamoceratidae	Phylloicus	flinti	Prather	2003
Calamoceratidae	Phylloicus	major	Müller	1880
Calamoceratidae	Phylloicus	medius	Müller	1880	x
Calamoceratidae	Phylloicus	mirabilis	Cavalcante, Dumas & Nessimian	2018	x
Calamoceratidae	Phylloicus	monneorum	Dumas & Nessimian	2010	x
Calamoceratidae	Phylloicus	obliquus	Navás	1931	x
Calamoceratidae	Phylloicus	paprockii	Prather	2003	x
Calamoceratidae	Phylloicus	pirapo	Prather	2003
Calamoceratidae	Phylloicus	plaumanni	Flint	1983
Calamoceratidae	Phylloicus	quadridigitatus	Prather	2003	x
Calamoceratidae	Phylloicus	sallesi	Barcelos-Silva, Desidério & Pes	2017	x
Calamoceratidae	Phylloicus	tricalcaratus	(Ulmer)	1905	x
Calamoceratidae	Phylloicus	yolandae	Prather	2003	x
Ecnomidae	Austrotinodes	abrachium	Thomson & Holzenthal	2010	x
Ecnomidae	Austrotinodes	absaberi	Dumas, Souza & Rocha	2017	x
Ecnomidae	Austrotinodes	adolfolutzi	Dumas, Souza & Rocha	2017	x
Ecnomidae	Austrotinodes	amazonensis	Flint & Denning	1989	x
Ecnomidae	Austrotinodes	ariasi	Flint & Denning	1989	x
Ecnomidae	Austrotinodes	belchioris	Thomson & Holzenthal	2010	x
Ecnomidae	Austrotinodes	berthalitzae	Dumas, Souza & Rocha	2017	x
Ecnomidae	Austrotinodes	bracteatus	Flint & Denning	1989	x
Ecnomidae	Austrotinodes	carioca	Cavalcante, Dumas & Nessimian	2017	x
Ecnomidae	Austrotinodes	chagasi	Dumas, Souza & Rocha	2017	x
Ecnomidae	Austrotinodes	costalimai	Dumas, Souza & Rocha	2017	x
Ecnomidae	Austrotinodes	cruzi	Dumas, Souza & Rocha	2017	x
Ecnomidae	Austrotinodes	donagrazielae	Dumas, Souza & Rocha	2017	x
Ecnomidae	Austrotinodes	gusmaoi	Dumas, Souza & Rocha	2017	x
Ecnomidae	Austrotinodes	lattesi	Dumas, Souza & Rocha	2017	x
Ecnomidae	Austrotinodes	lenti	Dumas, Souza & Rocha	2017	x
Ecnomidae	Austrotinodes	longispinum	Thomson & Holzenthal	2010	x
Ecnomidae	Austrotinodes	neblinensis	Flint & Denning	1989
Ecnomidae	Austrotinodes	paraguayenis	Flint	1983
Ecnomidae	Austrotinodes	prolixus	Flint & Denning	1989	x
Ecnomidae	Austrotinodes	quintarellii	Cavalcante, Dumas & Nessimian	2017	x
Ecnomidae	Austrotinodes	santosdumonti	Dumas, Souza & Rocha	2017	x
Ecnomidae	Austrotinodes	taquaralis	Thomson & Holzenthal	2010	x
Ecnomidae	Austrotinodes	tepui	Neto & Passos	2018	x
Ecnomidae	Austrotinodes	uruguayensis	Angrisano	1994
Ecnomidae	Austrotinodes	vanzolinii	Dumas, Souza & Rocha	2017	x
Ecnomidae	Austrotinodes	vitalbrazili	Dumas, Souza & Rocha	2017	x
Glossosomatidae	Canoptila	bifida	Mosely	1939	x
Glossosomatidae	Canoptila	williami	Robertson & Holzenthal	2006	x
Glossosomatidae	Itauara	alexanderi	Robertson & Holzenthal	2006	x
Glossosomatidae	Itauara	amazonica	(Flint)	1971	x
Glossosomatidae	Itauara	blahniki	Robertson & Holzenthal	2011	x
Glossosomatidae	Itauara	brasiliana	(Mosely)	1939
Glossosomatidae	Itauara	charlotta	Robertson & Holzenthal	2011	x
Glossosomatidae	Itauara	emilia	Robertson & Holzenthal	2011	x
Glossosomatidae	Itauara	flinti	Robertson & Holzenthal	2011	x
Glossosomatidae	Itauara	jamesii	Robertson & Holzenthal	2011	x
Glossosomatidae	Itauara	julia	Robertson & Holzenthal	2011	x
Glossosomatidae	Itauara	lucinda	Robertson & Holzenthal	2011	x
Glossosomatidae	Itauara	plaumanii	(Flint)	1974
Glossosomatidae	Itauara	rodmani	Robertson & Holzenthal	2011	x
Glossosomatidae	Itauara	simplex	Robertson & Holzenthal	2011	x
Glossosomatidae	Itauara	stella	Robertson & Holzenthal	2011	x
Glossosomatidae	Itauara	tusci	Robertson & Holzenthal	2011	x
Glossosomatidae	Mortoniella	acauda	Blahnik & Holzenthal	2011	x
Glossosomatidae	Mortoniella	agosta	Blahnik & Holzenthal	2011	x
Glossosomatidae	Mortoniella	albolineata	Ulmer	1907
Glossosomatidae	Mortoniella	alicula	Blahnik & Holzenthal	2011	x
Glossosomatidae	Mortoniella	asymmetris	Blahnik & Holzenthal	2011
Glossosomatidae	Mortoniella	bocaina	Blahnik & Holzenthal	2011	x
Glossosomatidae	Mortoniella	catarinensis	(Flint)	1974	x
Glossosomatidae	Mortoniella	crescentis	Blahnik & Holzenthal	2011	x
Glossosomatidae	Mortoniella	dolonis	Blahnik & Holzenthal	2011	x
Glossosomatidae	Mortoniella	froehlichi	Blahnik & Holzenthal	2011	x
Glossosomatidae	Mortoniella	guahybae	Blahnik & Holzenthal	2011	x
Glossosomatidae	Mortoniella	hystricosa	Blahnik & Holzenthal	2011	x
Glossosomatidae	Mortoniella	intervales	Blahnik & Holzenthal	2011	x
Glossosomatidae	Mortoniella	latispina	Blahnik & Holzenthal	2011	x
Glossosomatidae	Mortoniella	longispina	Blahnik & Holzenthal	2011	x
Glossosomatidae	Mortoniella	meloi	Blahnik & Holzenthal	2011	x
Glossosomatidae	Mortoniella	ormina	(Mosely)	1939	x
Glossosomatidae	Mortoniella	parauna	Blahnik & Holzenthal	2011	x
Glossosomatidae	Mortoniella	paraunota	Blahnik & Holzenthal	2011
Glossosomatidae	Mortoniella	pumila	Blahnik & Holzenthal	2011	x
Glossosomatidae	Mortoniella	pusilla	Blahnik & Holzenthal	2011	x
Glossosomatidae	Mortoniella	teutona	(Mosely)	1939
Glossosomatidae	Mortoniella	tripuiensis	Blahnik & Holzenthal	2011	x
Glossosomatidae	Mortoniella	truncata	Blahnik & Holzenthal	2011	x
Glossosomatidae	Mortoniella	unota	(Mosely)	1939
Glossosomatidae	Mortoniella	uruguaiensis	Blahnik & Holzenthal	2011
Glossosomatidae	Protoptila	condylifera	Flint	1971	x
Glossosomatidae	Protoptila	cora	Flint	1983
Glossosomatidae	Protoptila	distischa	Flint	1971	x
Glossosomatidae	Protoptila	dubitans	Mosely	1939
Glossosomatidae	Protoptila	ensifera	Flint	1971
Glossosomatidae	Protoptila	flexispina	Flint	1971	x
Glossosomatidae	Protoptila	longispinata	Santos & Nessimian	2009	x
Glossosomatidae	Protoptila	macilenta	Flint	1971	x
Glossosomatidae	Protoptila	mara	Flint	1971	x
Glossosomatidae	Protoptila	simplex	Flint	1971
Glossosomatidae	Protoptila	ternatia	Flint	1971	x
Glossosomatidae	Protoptila	tetravittata	Flint	1971	x
Glossosomatidae	Protoptila	trispicata	Flint	1971	x
Glossosomatidae	Tolhuaca	brasiliensis	Robertson & Holzenthal	2005	x
Helicopsychidae	Helicopsyche	amazona	Johanson	2003	x
Helicopsychidae	Helicopsyche	amica	Johanson	2003
Helicopsychidae	Helicopsyche	angeloi	Holzenthal, Blahnik & Calor	2016	x
Helicopsychidae	Helicopsyche	bedengo	Dumas & Nessimian	2019	x
Helicopsychidae	Helicopsyche	blahniki	Johanson	2003
Helicopsychidae	Helicopsyche	brazilia	Johanson	2003	x
Helicopsychidae	Helicopsyche	braziliensis	(Swainson)	1840	x
Helicopsychidae	Helicopsyche	carajas	Gama-Neto, Ribeiro & Passos	2019	x
Helicopsychidae	Helicopsyche	catoles	Souza, Gomes & Calor	2017	x
Helicopsychidae	Helicopsyche	cipoensis	Johanson & Malm	2006	x
Helicopsychidae	Helicopsyche	clara	(Ulmer)	1905
Helicopsychidae	Helicopsyche	daome	Dumas & Nessimian	2019	x
Helicopsychidae	Helicopsyche	dinoprata	Dumas & Nessimian	2019	x
Helicopsychidae	Helicopsyche	flinti	Johanson	1999
Helicopsychidae	Helicopsyche	guara	Holzenthal, Blahnik & Calor	2016	x
Helicopsychidae	Helicopsyche	guariru	Vilarino & Calor	2017	x
Helicopsychidae	Helicopsyche	helicoidella	(Vallot)	1855	x
Helicopsychidae	Helicopsyche	inflata	Gama-Neto, Ribeiro & Passos	2019	x
Helicopsychidae	Helicopsyche	lazzariae	Holzenthal, Blahnik & Calor	2016	x
Helicopsychidae	Helicopsyche	lobata	Flint	1983
Helicopsychidae	Helicopsyche	luziae	Dumas & Nessimian	2019	x
Helicopsychidae	Helicopsyche	monda	Flint	1983
Helicopsychidae	Helicopsyche	muelleri	Banks	1920
Helicopsychidae	Helicopsyche	opalescens	(Flint)	1972
Helicopsychidae	Helicopsyche	pandeirosa	Johanson	2003	x
Helicopsychidae	Helicopsyche	paprockii	Johanson	2006	x
Helicopsychidae	Helicopsyche	petri	Dumas & Nessimian	2019	x
Helicopsychidae	Helicopsyche	planorboides	Machado	1957	x
Helicopsychidae	Helicopsyche	shaamanensu	Dumas & Nessimian	2019	x
Helicopsychidae	Helicopsyche	succinta	Johanson & Holzenthal	2004
Helicopsychidae	Helicopsyche	timbira	Silva, Santos & Nessimian	2014	x
Helicopsychidae	Helicopsyche	valligera	Flint	1983	x
Helicopsychidae	Helicopsyche	vergelana	Ross	1956
Helicopsychidae	Helicopsyche	xinguensis	Johanson	2003	x
Hydrobiosidae	Atopsyche	acahuana	Schmid	1989	x
Hydrobiosidae	Atopsyche	antisuya	Schmid	1989	x
Hydrobiosidae	Atopsyche	apurimac	Schmid	1989	x
Hydrobiosidae	Atopsyche	blahniki	Santos & Holzenthal	2012	x
Hydrobiosidae	Atopsyche	chirihuana	Schmid	1989
Hydrobiosidae	Atopsyche	diamantina	Gomes & Calor	2016	x
Hydrobiosidae	Atopsyche	erigia	Ross	1947
Hydrobiosidae	Atopsyche	galharda	Santos & Holzenthal	2012	x
Hydrobiosidae	Atopsyche	hamata	Ross & King	1952	x
Hydrobiosidae	Atopsyche	hatunpuna	Schmid	1989	x
Hydrobiosidae	Atopsyche	huacachaca	Schmid	1989	x
Hydrobiosidae	Atopsyche	huamachucu	Schmid	1989	x
Hydrobiosidae	Atopsyche	huanapu	Schmid	1989	x
Hydrobiosidae	Atopsyche	huarcu	Schmid	1989	x
Hydrobiosidae	Atopsyche	japi	Gomes & Calor	2019	x
Hydrobiosidae	Atopsyche	kamakan	Gomes & Calor	2016	x
Hydrobiosidae	Atopsyche	longipennis	(Ulmer)	1905
Hydrobiosidae	Atopsyche	muelleri	Gomes & Calor	2016	x
Hydrobiosidae	Atopsyche	parauna	Santos & Holzenthal	2012	x
Hydrobiosidae	Atopsyche	plancki	Marlier	1964	x
Hydrobiosidae	Atopsyche	rinconi	Holzenthal & Cressa	2002
Hydrobiosidae	Atopsyche	sanctipauli	Flint	1974	x
Hydrobiosidae	Atopsyche	serica	Ross	1953	x
Hydrobiosidae	Atopsyche	siolii	Flint	1971	x
Hydrobiosidae	Atopsyche	urumarca	Schmid	1989	x
Hydrobiosidae	Atopsyche	usingeri	Denning & Sykora	1968	x
Hydrobiosidae	Atopsyche	zernyi	Flint	1974	x
Hydropsychidae	Blepharopus	diaphanus	Kolenati	1859
Hydropsychidae	Centromacronema	auripenne	(Rambur)	1842
Hydropsychidae	Centromacronema	obscurum	(Ulmer)	1905
Hydropsychidae	Centromacronema	pioneira	Dias & Calor	2016	x
Hydropsychidae	Centromacronema	poyanawa	Dias & Calor	2016	x
Hydropsychidae	Leptonema	agraphum	(Kolenati)	1859	x
Hydropsychidae	Leptonema	amazonense	Flint	1978
Hydropsychidae	Leptonema	amplifurcatum	Dumas & Nessimian	2009	x
Hydropsychidae	Leptonema	aspersum	(Ulmer)	1907
Hydropsychidae	Leptonema	aterrimum	Mosely	1933	x
Hydropsychidae	Leptonema	bifurcatodes	Flint	2008	x
Hydropsychidae	Leptonema	bifurcatum	Flint, McAlpine & Ross	1987	x
Hydropsychidae	Leptonema	boraceia	Flint, McAlpine & Ross	1987	x
Hydropsychidae	Leptonema	columbianum	Ulmer	1905
Hydropsychidae	Leptonema	crassum	Ulmer	1905
Hydropsychidae	Leptonema	eugnathum	(Müller)	1921	x
Hydropsychidae	Leptonema	ferelunatum	Jardim, Dumas & Nessimian	2010	x
Hydropsychidae	Leptonema	lacuniferum	Flint	1978
Hydropsychidae	Leptonema	lineaticorne	Flint	2008
Hydropsychidae	Leptonema	lunatum	Flint, McAlpine & Ross	1987	x
Hydropsychidae	Leptonema	macacu	Flint	2008	x
Hydropsychidae	Leptonema	maculatum	Mosely	1933
Hydropsychidae	Leptonema	pallidum	Guérin-Méneville	1843
Hydropsychidae	Leptonema	ramosum	Flint, McAlpine & Ross	1987
Hydropsychidae	Leptonema	rostratum	Flint, McAlpine & Ross	1987
Hydropsychidae	Leptonema	sancticaroli	Flint, McAlpine & Ross	1987
Hydropsychidae	Leptonema	santosi	Jardim, Dumas & Nessimian	2010	x
Hydropsychidae	Leptonema	serranum	Navás	1933	x
Hydropsychidae	Leptonema	serratum	Jardim, Dumas & Nessimian	2010	x
Hydropsychidae	Leptonema	sparsum	(Ulmer)	1905
Hydropsychidae	Leptonema	speciosum	(Burmeister)	1839	x
Hydropsychidae	Leptonema	spinulum	Flint, McAlpine & Ross	1987
Hydropsychidae	Leptonema	stigmaticum	Navás	1916	x
Hydropsychidae	Leptonema	tholloni	Navás	1923	x
Hydropsychidae	Leptonema	tridens	Mosely	1933
Hydropsychidae	Leptonema	trispicatum	Flint, McAlpine & Ross	1987	x
Hydropsychidae	Leptonema	viridianum	Navás	1916
Hydropsychidae	Macronema	amazonense	Flint	1978	x
Hydropsychidae	Macronema	argentilineatum	Ulmer	1905
Hydropsychidae	Macronema	bicolor	(Ulmer)	1905	x
Hydropsychidae	Macronema	burmeisteri	Banks	1924
Hydropsychidae	Macronema	exophtalmum	Flint	1978	x
Hydropsychidae	Macronema	fragile	Banks	1915
Hydropsychidae	Macronema	fulvum	Ulmer	1905	x
Hydropsychidae	Macronema	hageni	Banks	1924
Hydropsychidae	Macronema	immaculatum	Mosely	1934	x
Hydropsychidae	Macronema	lachlani	Banks	1924	x
Hydropsychidae	Macronema	lineatum	Pictet	1836	x
Hydropsychidae	Macronema	muelleri	Banks	1924	x
Hydropsychidae	Macronema	paliferum	Flint	1974
Hydropsychidae	Macronema	partitum	Navás	1932	x
Hydropsychidae	Macronema	parvum	Ulmer	1905
Hydropsychidae	Macronema	pennyi	Flint	1978	x
Hydropsychidae	Macronema	percitans	Walker	1860
Hydropsychidae	Macronema	pertyi	Banks	1924
Hydropsychidae	Macronema	rubiginosum	Guérin-Méneville	1843	x
Hydropsychidae	Macrostemum	araca	Pes, Desidério, Barcelos-Silva & Hamada	2019	x
Hydropsychidae	Macrostemum	arcuatum	(Erichson)	1848
Hydropsychidae	Macrostemum	brasiliense	(Fischer)	1970	x
Hydropsychidae	Macrostemum	braueri	(Banks)	1924	x
Hydropsychidae	Macrostemum	bravoi	França, Paprocki & Calor	2013	x
Hydropsychidae	Macrostemum	digramma	(McLachlan)	1871	x
Hydropsychidae	Macrostemum	erichsoni	(Banks)	1920
Hydropsychidae	Macrostemum	hyalinum	(Pictet)	1843
Hydropsychidae	Macrostemum	negrense	(Flint)	1978	x
Hydropsychidae	Macrostemum	nigrum	França, Paprocki & Calor	2013	x
Hydropsychidae	Macrostemum	par	(Navás)	1930	x
Hydropsychidae	Macrostemum	ramosum	(Navás)	1916	x
Hydropsychidae	Macrostemum	santaeritae	(Ulmer)	1905
Hydropsychidae	Macrostemum	surinamense	(Flint)	1974
Hydropsychidae	Macrostemum	trigramma	(Navás)	1916	x
Hydropsychidae	Macrostemum	triste	(Navás)	1916	x
Hydropsychidae	Macrostemum	ulmeri	(Banks)	1913
Hydropsychidae	Plectromacronema	comptum	Ulmer	1906
Hydropsychidae	Plectromacronema	solaris	Paprocki & Moreira-Silva	2018	x
Hydropsychidae	Plectromacronema	subfuscum	(Banks)	1920
Hydropsychidae	Pseudomacronema	vittatum	Ulmer	1905
Hydropsychidae	Smicridea	abrupta	Flint	1974
Hydropsychidae	Smicridea	aequalis	Banks	1920
Hydropsychidae	Smicridea	albosignata	Ulmer	1907	x
Hydropsychidae	Smicridea	appendiculata	Flint	1972
Hydropsychidae	Smicridea	araguaiense	Albino, Pes & Hamada	2011	x
Hydropsychidae	Smicridea	atrobasis	Flint	1983
Hydropsychidae	Smicridea	bicornuta	Albino, Pes & Hamada	2011	x
Hydropsychidae	Smicridea	bifasciata	Albino, Pes & Hamada	2011	x
Hydropsychidae	Smicridea	bivittata	(Hagen)	1861
Hydropsychidae	Smicridea	brasiliana	Ulmer	1905	x
Hydropsychidae	Smicridea	caatinga	Alves, Santos & Nessimian	2018	x
Hydropsychidae	Smicridea	caligata	Flint	1974
Hydropsychidae	Smicridea	columbiana	Ulmer	1905
Hydropsychidae	Smicridea	coronata	Flint	1980
Hydropsychidae	Smicridea	dentifera	Flint	1983
Hydropsychidae	Smicridea	dentiserrata	Albino, Pes & Hamada	2011	x
Hydropsychidae	Smicridea	discalis	Flint	1972
Hydropsychidae	Smicridea	ephippifer	Flint	1978
Hydropsychidae	Smicridea	erecta	Flint	1974
Hydropsychidae	Smicridea	flinti	Albino, Pes & Hamada	2011	x
Hydropsychidae	Smicridea	forcipata	Flint	1983
Hydropsychidae	Smicridea	franciscana	Rocha, Dumas & Nessimian	2016	x
Hydropsychidae	Smicridea	froehlichi	Almeida & Flint	2002	x
Hydropsychidae	Smicridea	gemina	Blahnik	1995
Hydropsychidae	Smicridea	gladiator	Flint	1978	x
Hydropsychidae	Smicridea	helenae	Albino, Pes & Hamada	2011	x
Hydropsychidae	Smicridea	iguazu	Flint	1983
Hydropsychidae	Smicridea	jundiai	Almeida & Flint	2002	x
Hydropsychidae	Smicridea	mangaratiba	Almeida & Flint	2002	x
Hydropsychidae	Smicridea	marlieri	Flint	1978
Hydropsychidae	Smicridea	marua	Flint	1978	x
Hydropsychidae	Smicridea	mesembrina	Navás	1918
Hydropsychidae	Smicridea	mirnae	Almeida & Flint	2002	x
Hydropsychidae	Smicridea	necator	Rocha, Dumas & Nessimian	2016	x
Hydropsychidae	Smicridea	obliqua	Flint	1974
Hydropsychidae	Smicridea	palifera	Flint	1981
Hydropsychidae	Smicridea	palmar	Sganga	2005
Hydropsychidae	Smicridea	paranensis	Flint	1983
Hydropsychidae	Smicridea	piraya	Flint	1983
Hydropsychidae	Smicridea	pseudolobata	Flint	1978
Hydropsychidae	Smicridea	radula	Flint	1974
Hydropsychidae	Smicridea	ralphi	Almeida & Flint	2002	x
Hydropsychidae	Smicridea	reinerti	Flint	1978	x
Hydropsychidae	Smicridea	roraimense	Albino, Pes & Hamada	2011	x
Hydropsychidae	Smicridea	sattleri	Denning & Sykora	1968	x
Hydropsychidae	Smicridea	scutellaris	Flint	1974
Hydropsychidae	Smicridea	sepala	Rocha, Dumas & Nessimian	2016	x
Hydropsychidae	Smicridea	sexpinosa	Flint	1978	x
Hydropsychidae	Smicridea	spinulosa	Flint	1972
Hydropsychidae	Smicridea	truncata	Flint	1974	x
Hydropsychidae	Smicridea	unguiculata	Flint	1983
Hydropsychidae	Smicridea	vermiculata	Flint	1978
Hydropsychidae	Smicridea	vilela	Flint	1978
Hydropsychidae	Smicridea	voluta	Flint	1978
Hydropsychidae	Smicridea	weidneri	Flint	1972
Hydropsychidae	Synoestropsis	furcata	Flint	1974
Hydropsychidae	Synoestropsis	grisoli	Navás	1924
Hydropsychidae	Synoestropsis	obliqua	Ulmer	1905	x
Hydropsychidae	Synoestropsis	pedicillata	Ulmer	1905	x
Hydropsychidae	Synoestropsis	punctipennis	Ulmer	1905
Hydropsychidae	Synoestropsis	stictonota	Navás	1932	x
Hydroptilidae	Acostatrichia	brevipenis	Flint	1974
Hydroptilidae	Acostatrichia	buborektala	Oláh & Johanson	2011
Hydroptilidae	Acostatrichia	elvesta	Oláh & Flint	2012	x
Hydroptilidae	Acostatrichia	fluminensis	(Santos & Nessimian)	2010	x
Hydroptilidae	Acostatrichia	ketvilla	Oláh & Flint	2012	x
Hydroptilidae	Acostatrichia	plaumanni	Mosely	1939
Hydroptilidae	Acostatrichia	simulans	Mosely	1939
Hydroptilidae	Acostatrichia	tuskera	Oláh & Flint	2012	x
Hydroptilidae	Alisotrichia	cacaulandia	Harris & Flint	2002	x
Hydroptilidae	Alisotrichia	holzenthali	Santos	2011	x
Hydroptilidae	Alisotrichia	macae	Santos	2011	x
Hydroptilidae	Alisotrichia	nessimiani	Santos	2011	x
Hydroptilidae	Alisotrichia	ubatuba	Santos	2011	x
Hydroptilidae	Anchitrichia	duplifurcata	Flint	1983
Hydroptilidae	Ascotrichia	adirecta	Thomson	2019	x
Hydroptilidae	Ascotrichia	frontalis	Flint	1983
Hydroptilidae	Ascotrichia	hystricosa	Thomson	2019	x
Hydroptilidae	Ascotrichia	simoma	Thomson	2019	x
Hydroptilidae	Betrichia	bispinosa	Flint	1974
Hydroptilidae	Betrichia	kagyla	Oláh & Flint	2012	x
Hydroptilidae	Betrichia	longistyla	Flint	1983	x
Hydroptilidae	Betrichia	nhundiaquara	Souza, Santos & Takiya	2016	x
Hydroptilidae	Betrichia	uruguayensis	Angrisano	1995
Hydroptilidae	Betrichia	varratlana	Oláh & Flint	2012
Hydroptilidae	Betrichia	zilbra	Mosely	1939
Hydroptilidae	Bredinia	espinosa	Harris, Holzenthal & Flint	2002
Hydroptilidae	Byrsopteryx	abrelata	Harris & Holzenthal	1994	x
Hydroptilidae	Byrsopteryx	carioca	Santos & Nessimian	2010	x
Hydroptilidae	Byrsopteryx	espinhosa	Harris & Holzenthal	1994	x
Hydroptilidae	Costatrichia	hamulifera	(Flint)	1983
Hydroptilidae	Costatrichia	ipixuna	Santos, Takiya & Nessimian	2013	x
Hydroptilidae	Costatrichia	nelsonferreirai	Santos & Nessimian	2010	x
Hydroptilidae	Costatrichia	noite	Angrisano	1995
Hydroptilidae	Dicaminus	ladislavii	(Müller)	1879	x
Hydroptilidae	Flintiella	andreae	Angrisano	1995
Hydroptilidae	Flintiella	astilla	Harris, Flint & Holzenthal	2002
Hydroptilidae	Flintiella	boraceia	Harris, Flint & Holzenthal	2002	x
Hydroptilidae	Flintiella	carajas	Santos, Jardim & Nessimian	2011	x
Hydroptilidae	Flintiella	harrisi	Souza, Santos & Takiya	2016	x
Hydroptilidae	Flintiella	manauara	Santos & Nessimian	2009	x
Hydroptilidae	Flintiella	pallida	Souza, Santos & Takiya	2016	x
Hydroptilidae	Flintiella	pizotensis	Harris, Flint & Holzenthal	2002
Hydroptilidae	Hydroptila	argentinica	Flint	1983
Hydroptilidae	Hydroptila	florestani	Souza, Santos & Takiya	2014	x
Hydroptilidae	Hydroptila	marighellai	Souza, Santos & Takiya	2014	x
Hydroptilidae	Hydroptila	producta	Mosely	1939
Hydroptilidae	Hydroptila	zerbinae	Souza, Santos & Takiya	2014	x
Hydroptilidae	Leucotrichia	alibrachia	(Thomson)	2012	x
Hydroptilidae	Leucotrichia	bicornuta	Thomson	2012	x
Hydroptilidae	Leucotrichia	brasiliana	Sattler & Sykora	1977	x
Hydroptilidae	Metrichia	acuminata	Santos, Takiya & Nessimian	2016	x
Hydroptilidae	Metrichia	azul	Santos, Takiya & Nessimian	2016	x
Hydroptilidae	Metrichia	bonita	Santos, Takiya & Nessimian	2016	x
Hydroptilidae	Metrichia	bracui	Santos, Takiya & Nessimian	2016	x
Hydroptilidae	Metrichia	caraca	Santos, Takiya & Nessimian	2016	x
Hydroptilidae	Metrichia	circuliforme	Santos, Takiya & Nessimian	2016	x
Hydroptilidae	Metrichia	curta	Santos, Takiya & Nessimian	2016	x
Hydroptilidae	Metrichia	farofa	Santos, Takiya & Nessimian	2016	x
Hydroptilidae	Metrichia	forceps	Santos, Takiya & Nessimian	2016	x
Hydroptilidae	Metrichia	formosinha	Santos, Takiya & Nessimian	2016	x
Hydroptilidae	Metrichia	goiana	Santos, Takiya & Nessimian	2016	x
Hydroptilidae	Metrichia	itabaiana	Santos, Takiya & Nessimian	2016	x
Hydroptilidae	Metrichia	longissima	Santos, Takiya & Nessimian	2016	x
Hydroptilidae	Metrichia	peluda	Santos, Takiya & Nessimian	2016	x
Hydroptilidae	Metrichia	pernambucana	Souza & Santos	2013	x
Hydroptilidae	Metrichia	rafaeli	Santos, Takiya & Nessimian	2016	x
Hydroptilidae	Metrichia	simples	Santos, Takiya & Nessimian	2016	x
Hydroptilidae	Metrichia	talhada	Santos, Takiya & Nessimian	2016	x
Hydroptilidae	Metrichia	tere	Santos, Takiya & Nessimian	2016	x
Hydroptilidae	Metrichia	ubajara	Santos, Takiya & Nessimian	2016	x
Hydroptilidae	Metrichia	vulgaris	Santos, Takiya & Nessimian	2016	x
Hydroptilidae	Neotrichia	abbreviata	Flint	1983
Hydroptilidae	Neotrichia	bellinii	Santos & Nessimian	2009	x
Hydroptilidae	Neotrichia	browni	Harris	1990
Hydroptilidae	Neotrichia	colmillosa	Harris	1900
Hydroptilidae	Neotrichia	didii	Santos & Nessimian	2009	x
Hydroptilidae	Neotrichia	djalmasantosi	Santos & Nessimian	2009	x
Hydroptilidae	Neotrichia	dubitans	(Mosely)	1939	x
Hydroptilidae	Neotrichia	durior	Flint	1983
Hydroptilidae	Neotrichia	feolai	Santos & Nessimian	2009
Hydroptilidae	Neotrichia	filifera	Flint	1983
Hydroptilidae	Neotrichia	garrinchai	Santos & Nessimian	2009	x
Hydroptilidae	Neotrichia	gilmari	Santos & Nessimian	2009	x
Hydroptilidae	Neotrichia	longissima	Flint	1983	x
Hydroptilidae	Neotrichia	niltonsantosi	Santos & Nessimian	2009	x
Hydroptilidae	Neotrichia	noteuna	(Mosely)	1939
Hydroptilidae	Neotrichia	novara	(Mosely)	1939
Hydroptilidae	Neotrichia	orlandoi	Santos & Nessimian	2009	x
Hydroptilidae	Neotrichia	ovona	(Mosely)	1939	x
Hydroptilidae	Neotrichia	pelei	Santos & Nessimian	2009	x
Hydroptilidae	Neotrichia	rotundata	Flint	1974
Hydroptilidae	Neotrichia	sicilicula	Flint	1983
Hydroptilidae	Neotrichia	tertia	(Mosely)	1939
Hydroptilidae	Neotrichia	teutonia	Flint	1983	x
Hydroptilidae	Neotrichia	vavai	Santos & Nessimian	2009	x
Hydroptilidae	Neotrichia	zagalloi	Santos & Nessimian	2009	x
Hydroptilidae	Neotrichia	zitoi	Santos & Nessimian	2009	x
Hydroptilidae	Nothotrichia	tupi	Holzenthal & Harris	2002	x
Hydroptilidae	Ochrotrichia	caatinga	Souza, Santos & Takiya	2014	x
Hydroptilidae	Ochrotrichia	concha	Bueno-Soria & Santiago-Fragoso	1992	x
Hydroptilidae	Ochrotrichia	constricta	Souza, Santos & Takiya	2014	x
Hydroptilidae	Ochrotrichia	igrapiuna	Souza, Santos & Takiya	2014	x
Hydroptilidae	Ochrotrichia	limeirai	Souza, Santos & Takiya	2014	x
Hydroptilidae	Ochrotrichia	manuensis	Flint & Bueno-Soria	1999
Hydroptilidae	Ochrotrichia	nematomorpha	Cavalcante, Dumas & Nessimian	2018	x
Hydroptilidae	Ochrotrichia	patulosa	(Wasmund & Holzenthal)	2007	x
Hydroptilidae	Ochrotrichia	priapo	Souza, Santos & Takiya	2014	x
Hydroptilidae	Ochrotrichia	sagitta	Cavalcante, Dumas & Nessimian	2018	x
Hydroptilidae	Ochrotrichia	taunay	Cavalcante, Dumas & Nessimian	2018	x
Hydroptilidae	Orinocotrichia	angelus	Souza, Santos & Takiya	2016	x
Hydroptilidae	Oxyethira	bettyae	Thomson & Holzenthal	2012
Hydroptilidae	Oxyethira	bicornuta	Kelley	1983	x
Hydroptilidae	Oxyethira	brasiliensis	Kelley	1983	x
Hydroptilidae	Oxyethira	calori	Souza & Santos	2017	x
Hydroptilidae	Oxyethira	cascadanta	Rocha, Dumas & Souza	2017	x
Hydroptilidae	Oxyethira	circaverna	Kelley	1983
Hydroptilidae	Oxyethira	diplospissa	Souza & Santos	2017	x
Hydroptilidae	Oxyethira	discaelata	Kelley	1983
Hydroptilidae	Oxyethira	espinada	Holzenthal & Harris	1992
Hydroptilidae	Oxyethira	gracilianoi	Souza & Santos	2017	x
Hydroptilidae	Oxyethira	guariba	Souza & Santos	2017	x
Hydroptilidae	Oxyethira	hyalina	(Müller)	1879	x
Hydroptilidae	Oxyethira	iannuzzae	Souza & Santos	2017	x
Hydroptilidae	Oxyethira	lagunita	Flint	1982
Hydroptilidae	Oxyethira	longipenis	Santos, Henriques-Oliveira & Nessimian	2009	x
Hydroptilidae	Oxyethira	longissima	Flint	1974
Hydroptilidae	Oxyethira	luanae	Santos, Henriques-Oliveira & Nessimian	2009	x
Hydroptilidae	Oxyethira	macrosterna	Flint	1974
Hydroptilidae	Oxyethira	maranhensis	Souza & Santos	2017	x
Hydroptilidae	Oxyethira	merga	Kelley	1983
Hydroptilidae	Oxyethira	parce	(Edwards & Arnold)	1961
Hydroptilidae	Oxyethira	peruviana	Harris & Davenport	1999
Hydroptilidae	Oxyethira	picita	Harris & Davenport	1999
Hydroptilidae	Oxyethira	presilla	Harris & Davenport	1999
Hydroptilidae	Oxyethira	quadrilobata	Rocha, Dumas & Souza	2017	x
Hydroptilidae	Oxyethira	rafaeli	Souza & Santos	2017	x
Hydroptilidae	Oxyethira	retrosa	Souza & Santos	2017	x
Hydroptilidae	Oxyethira	santiagensis	Flint	1982
Hydroptilidae	Oxyethira	septentrionalis	Souza & Santos	2017	x
Hydroptilidae	Oxyethira	singularis	Souza & Santos	2017	x
Hydroptilidae	Oxyethira	sinistra	Santos, Henriques-Oliveira & Nessimian	2009	x
Hydroptilidae	Oxyethira	spirogyrae	(Müller)	1879	x
Hydroptilidae	Oxyethira	spissa	Kelley	1983	x
Hydroptilidae	Oxyethira	tica	Holzenthal & Harris	1992
Hydroptilidae	Oxyethira	una	Souza & Santos	2017	x
Hydroptilidae	Oxyethira	zilaba	(Mosely)	1939
Hydroptilidae	Peltopsyche	antennata	(Mosely)	1939
Hydroptilidae	Peltopsyche	sieboldii	Müller	1879	x
Hydroptilidae	Peltopsyche	squamosa	(Mosely)	1939	x
Hydroptilidae	Peltopsyche	vegosa	(Oláh & Flint)	2012
Hydroptilidae	Rhyacopsyche	angra	Santos, Jardim & Nessimian	2011	x
Hydroptilidae	Rhyacopsyche	bulbosa	Wasmund & Holzenthal	2007	x
Hydroptilidae	Rhyacopsyche	diacantha	Santos, Jardim & Nessimian	2011	x
Hydroptilidae	Rhyacopsyche	dikrosa	Wasmund & Holzenthal	2007	x
Hydroptilidae	Rhyacopsyche	hagenii	Müller	1879
Hydroptilidae	Tricholeiochiton	neotropicalis	Flint	1992	x
Hydroptilidae	Tupiniquintrichia	maclachlani	(Müller)	1879	x
Hydroptilidae	Tupiniquintrichia	procera	(Thomson & Holzenthal)	2015	x
Leptoceridae	Achoropsyche	duodecimpunctata	(Navás)	1916
Leptoceridae	Amazonatolica	hamadae	Holzenthal & Pes	2004	x
Leptoceridae	Atanatolica	bonita	Costa & Calor	2014	x
Leptoceridae	Atanatolica	brasiliana	Brauer	1865	x
Leptoceridae	Atanatolica	flinti	Holzenthal	1988	x
Leptoceridae	Atanatolica	nordestina	Henriques-Oliveira & Santos	2014	x
Leptoceridae	Grumichella	aequiunguis	Flint	1983
Leptoceridae	Grumichella	boraceia	Calor & Holzenthal	2016	x
Leptoceridae	Grumichella	jureia	Calor & Holzenthal	2016	x
Leptoceridae	Grumichella	leccii	Calor & Holzenthal	2016	x
Leptoceridae	Grumichella	muelleri	Calor & Holzenthal	2016	x
Leptoceridae	Grumichella	paprockii	Calor & Holzenthal	2016	x
Leptoceridae	Grumichella	parati	Calor & Holzenthal	2016	x
Leptoceridae	Grumichella	rostrata	Thienemann	1905	x
Leptoceridae	Nectopsyche	acutiloba	Flint	1974
Leptoceridae	Nectopsyche	adusta	Flint	1983
Leptoceridae	Nectopsyche	aureovittata	Flint	1983
Leptoceridae	Nectopsyche	bella	(Müller)	1921	x
Leptoceridae	Nectopsyche	bruchi	(Navás)	1920
Leptoceridae	Nectopsyche	brunneofascia	Flint	1983
Leptoceridae	Nectopsyche	diminuta	(Banks)	1920
Leptoceridae	Nectopsyche	flavofasciata	(Ulmer)	1907
Leptoceridae	Nectopsyche	fuscomaculata	Flint	1983
Leptoceridae	Nectopsyche	gemma	(Müller)	1880
Leptoceridae	Nectopsyche	gemmoides	Flint	1981
Leptoceridae	Nectopsyche	jenseni	(Ulmer)	1905
Leptoceridae	Nectopsyche	maculipennis	Flint	1983
Leptoceridae	Nectopsyche	modesta	Müller	1921	x
Leptoceridae	Nectopsyche	muelleri	(Ulmer)	1905	x
Leptoceridae	Nectopsyche	muhni	(Navás)	1916
Leptoceridae	Nectopsyche	multilineata	Flint	1983
Leptoceridae	Nectopsyche	navasi	Holzenthal	1999
Leptoceridae	Nectopsyche	nigricapilla	(Navás)	1922
Leptoceridae	Nectopsyche	ortizi	Holzenthal	1995
Leptoceridae	Nectopsyche	pantosticta	Flint	1983
Leptoceridae	Nectopsyche	punctata	(Ulmer)	1905
Leptoceridae	Nectopsyche	quatourguttata	(Navás)	1922
Leptoceridae	Nectopsyche	separata	(Banks)	1920
Leptoceridae	Nectopsyche	splendida	(Navás)	1917
Leptoceridae	Neoathripsodes	anomalus	Holzenthal	1989	x
Leptoceridae	Neoathripsodes	holzenthali	Dias, Quinteiro & Calor	2015	x
Leptoceridae	Notalina	brasiliana	Holzenthal	1986	x
Leptoceridae	Notalina	cipo	Holzenthal	1986	x
Leptoceridae	Notalina	franciscana	Henriques-Oliveira, Rocha & Nessimian	2018	x
Leptoceridae	Notalina	froehlichi	Calor & Holzenthal	2006	x
Leptoceridae	Notalina	goianensis	Calor	2008	x
Leptoceridae	Notalina	hamiltoni	Holzenthal	1986	x
Leptoceridae	Notalina	jordanensis	Henriques-Oliveira, Spies & Dumas	2012	x
Leptoceridae	Notalina	morsei	Holzenthal	1986	x
Leptoceridae	Notalina	paulista	Calor & Holzenthal	2006	x
Leptoceridae	Oecetis	acanthostema	Quinteiro & Calor	2015	x
Leptoceridae	Oecetis	acuticlasper	Quinteiro & Holzenthal	2017	x
Leptoceridae	Oecetis	amazonica	(Banks)	1924
Leptoceridae	Oecetis	angelae	Henriques-Oliveria, Dumas & Nessimian	2014	x
Leptoceridae	Oecetis	blahniki	Quinteiro & Holzenthal	2017	x
Leptoceridae	Oecetis	calori	Quinteiro & Holzenthal	2017	x
Leptoceridae	Oecetis	carinata	Quinteiro & Holzenthal	2017	x
Leptoceridae	Oecetis	cassicoleata	Quinteiro & Holzenthal	2017	x
Leptoceridae	Oecetis	catagua	Henriques-Oliveira, Rocha & Nessimian	2018	x
Leptoceridae	Oecetis	clavicornia	Quinteiro & Calor	2015	x
Leptoceridae	Oecetis	connata	Flint	1974
Leptoceridae	Oecetis	danielae	Henriques-Oliveira, Dumas & Nessimian	2014	x
Leptoceridae	Oecetis	doesburgi	Flint	1974
Leptoceridae	Oecetis	dominguezi	Rueda Martín, Gibon & Molina	2011
Leptoceridae	Oecetis	excisa	Ulmer	1907
Leptoceridae	Oecetis	fibra	Chen & Morse	2012	x
Leptoceridae	Oecetis	flinti	Quinteiro & Holzenthal	2017	x
Leptoceridae	Oecetis	froehlichi	Quinteiro & Calor	2015	x
Leptoceridae	Oecetis	furcata	Quinteiro & Calor	2015	x
Leptoceridae	Oecetis	gibbosa	Quinteiro & Holzenthal	2017	x
Leptoceridae	Oecetis	iara	Henriques-Oliveira, Dumas & Nessimian	2014	x
Leptoceridae	Oecetis	iguazu	Flint	1983
Leptoceridae	Oecetis	inconspicua	(Walker)	1852
Leptoceridae	Oecetis	knutsoni	Flint	1981
Leptoceridae	Oecetis	machaera	Quinteiro & Holzenthal	2017	x
Leptoceridae	Oecetis	martinae	Quinteiro & Calor	2015	x
Leptoceridae	Oecetis	paranensis	Flint	1982
Leptoceridae	Oecetis	pertica	Quinteiro & Holzenthal	2017	x
Leptoceridae	Oecetis	punctipennis	(Ulmer)	1905
Leptoceridae	Oecetis	rafaeli	Flint	1991	x
Leptoceridae	Triplectides	cipo	Henriques-Oliveira & Dumas	2015	x
Leptoceridae	Triplectides	egleri	Sattler	1963
Leptoceridae	Triplectides	gracilis	Burmeister	1839
Leptoceridae	Triplectides	itatiaia	Dumas & Nessimian	2010	x
Leptoceridae	Triplectides	maranhensis	Desidério, Barcelos-Silva & Pes	2017	x
Leptoceridae	Triplectides	misionensis	Holzenthal	1988
Leptoceridae	Triplectides	neotropicus	Holzenthal	1988
Leptoceridae	Triplectides	ultimus	Holzenthal	1988	x
Limnephilidae	Antarctoecia	brasiliensis	Huamantinco & Nessimian	2003	x
Odontoceridae	Anastomoneura	guahybae	Huamantinco & Nessimian	2004	x
Odontoceridae	Barypenthus	concolor	Burmeister	1839	x
Odontoceridae	Marilia	aiuruoca	Dumas & Nessimian	2009	x
Odontoceridae	Marilia	alata	Flint	1974
Odontoceridae	Marilia	albicornis	(Burmeister)	1839	x
Odontoceridae	Marilia	caramuru	Rocha & Souza	2018	x
Odontoceridae	Marilia	elongata	Martynov	1912
Odontoceridae	Marilia	fasciculata	Banks	1913
Odontoceridae	Marilia	flexuosa	Ulmer	1905
Odontoceridae	Marilia	guaira	Flint	1983
Odontoceridae	Marilia	huamantincoae	Dumas & Nessimian	2009	x
Odontoceridae	Marilia	infundibulum	Flint	1983
Odontoceridae	Marilia	lateralis	Flint	1983
Odontoceridae	Marilia	mahedae	Gama Neto, Pes & Hamada	2017	x
Odontoceridae	Marilia	major	Müller	1880	x
Odontoceridae	Marilia	minor	Müller	1880	x
Odontoceridae	Marilia	paraguassu	Rocha & Souza	2018	x
Odontoceridae	Marilia	sioli	Marlier	1964	x
Odontoceridae	Marilia	truncata	Flint	1983
Philopotamidae	Alterosa	affinis	Dumas & Nessimian	2013	x
Philopotamidae	Alterosa	amadoi	Dumas, Calor & Nessimian	2013	x
Philopotamidae	Alterosa	bandeira	Dumas & Nessimian	2013	x
Philopotamidae	Alterosa	beckeri	Blahnik	2005	x
Philopotamidae	Alterosa	bilanceolata	Dumas & Nessimian	2013	x
Philopotamidae	Alterosa	bocainae	Blahnik	2005	x
Philopotamidae	Alterosa	boraceiae	Blahnik	2005	x
Philopotamidae	Alterosa	caissara	Dumas & Nessimian	2013	x
Philopotamidae	Alterosa	caparaonensis	Blahnik	2005	x
Philopotamidae	Alterosa	capixaba	Dumas & Nessimian	2013	x
Philopotamidae	Alterosa	castroalvesi	Dumas, Calor & Nessimian	2013	x
Philopotamidae	Alterosa	catarinae	Dumas & Nessimian	2013	x
Philopotamidae	Alterosa	caymmii	Dumas, Calor & Nessimian	2013	x
Philopotamidae	Alterosa	escova	Blahnik	2005	x
Philopotamidae	Alterosa	falcata	Blahnik	2005	x
Philopotamidae	Alterosa	fimbriata	Blahnik	2005	x
Philopotamidae	Alterosa	flinti	Blahnik	2005	x
Philopotamidae	Alterosa	fluminensis	Blahnik	2005	x
Philopotamidae	Alterosa	graciosa	Dumas & Nessimian	2013	x
Philopotamidae	Alterosa	guapimirim	Blahnik	2005	x
Philopotamidae	Alterosa	holzenthali	Blahnik	2005	x
Philopotamidae	Alterosa	inappendiculata	Dumas & Nessimian	2013	x
Philopotamidae	Alterosa	intervales	Blahnik	2005	x
Philopotamidae	Alterosa	itatiaiae	Blahnik	2005	x
Philopotamidae	Alterosa	jordanensis	Blahnik	2005	x
Philopotamidae	Alterosa	marinonii	(Almeida & Duarte)	2003	x
Philopotamidae	Alterosa	morato	Dumas & Nessimian	2013	x
Philopotamidae	Alterosa	nessimiani	Jardim & Dumas	2012	x
Philopotamidae	Alterosa	orgaosensis	Blahnik	2005	x
Philopotamidae	Alterosa	paprockii	Blahnik	2005	x
Philopotamidae	Alterosa	paranaensis	Dumas & Nessimian	2013	x
Philopotamidae	Alterosa	polyacinata	Barcelos-Silva, Dumas & Pes	2015	x
Philopotamidae	Alterosa	ruschii	Dumas & Nessimian	2013	x
Philopotamidae	Alterosa	sanctaeteresae	Blahnik	2005	x
Philopotamidae	Alterosa	sanctipauli	(Flint)	1971	x
Philopotamidae	Alterosa	schadrackorum	Blahnik	2005	x
Philopotamidae	Alterosa	spiesae	Dumas & Nessimian	2013	x
Philopotamidae	Alterosa	tripuiensis	Blahnik	2005	x
Philopotamidae	Alterosa	truncata	Blahnik	2005	x
Philopotamidae	Chimarra	adamsae	Blahnik	1998
Philopotamidae	Chimarra	akantha	Blahnik	1997	x
Philopotamidae	Chimarra	anticheira	Vilarino & Calor	2015	x
Philopotamidae	Chimarra	aurivittata	Flint	1971
Philopotamidae	Chimarra	beckeri	Flint	1998	x
Philopotamidae	Chimarra	bidens	Ulmer	1909
Philopotamidae	Chimarra	boraceia	Flint	1998	x
Philopotamidae	Chimarra	brasiliana	(Ulmer)	1905
Philopotamidae	Chimarra	burmeisteri	Flint	1998	x
Philopotamidae	Chimarra	calori	Blahnik & Holzenthal	2012	x
Philopotamidae	Chimarra	camella	Blahnik	1997	x
Philopotamidae	Chimarra	camposae	Flint	1998	x
Philopotamidae	Chimarra	camura	Blahnik	1997	x
Philopotamidae	Chimarra	centrispina	Flint	1998	x
Philopotamidae	Chimarra	chela	Blahnik	1997
Philopotamidae	Chimarra	cipoensis	Flint	1998	x
Philopotamidae	Chimarra	conica	Flint	1983
Philopotamidae	Chimarra	cultellata	Flint	1983
Philopotamidae	Chimarra	curvipenis	Blahnik & Holzenthal	2012	x
Philopotamidae	Chimarra	diaksis	Flint	1971	x
Philopotamidae	Chimarra	donamariae	Denning & Sykora	1968
Philopotamidae	Chimarra	fittkaui	Flint	1971
Philopotamidae	Chimarra	froehlichi	Flint	1998	x
Philopotamidae	Chimarra	gondela	Flint	1974
Philopotamidae	Chimarra	guyanensis	Flint	1998
Philopotamidae	Chimarra	heligma	Blahnik	1997	x
Philopotamidae	Chimarra	heppneri	Blahnik	1997
Philopotamidae	Chimarra	hyoeides	Flint	1983
Philopotamidae	Chimarra	jugescens	Flint	1998	x
Philopotamidae	Chimarra	kontilos	Blahnik	1997	x
Philopotamidae	Chimarra	latiforceps	Blahnik & Holzenthal	2012	x
Philopotamidae	Chimarra	machadoi	Camargos	2016	x
Philopotamidae	Chimarra	majuscula	Blahnik	1997	x
Philopotamidae	Chimarra	medioloba	Flint	1971
Philopotamidae	Chimarra	mesodonta	Vilarino & Calor	2015	x
Philopotamidae	Chimarra	morio	Burmeister	1839	x
Philopotamidae	Chimarra	odonta	Blahnik	2002	x
Philopotamidae	Chimarra	parana	Flint	1972
Philopotamidae	Chimarra	paucispina	Santos & Nessimian	2009	x
Philopotamidae	Chimarra	petersorum	Flint	1998	x
Philopotamidae	Chimarra	petricola	Flint	1998	x
Philopotamidae	Chimarra	plaumanni	Flint	1983
Philopotamidae	Chimarra	quaternaria	Flint	1971	x
Philopotamidae	Chimarra	scopuloides	Flint	1974
Philopotamidae	Chimarra	simpliciforma	Flint	1971
Philopotamidae	Chimarra	singularis	Desidério, Barcelos-Silva & Hamada	2018	x
Philopotamidae	Chimarra	teresae	Flint	1998	x
Philopotamidae	Chimarra	tortuosa	Blahnik	1997	x
Philopotamidae	Chimarra	tucuna	Flint	1998	x
Philopotamidae	Chimarra	uara	Flint	1971
Philopotamidae	Chimarra	usitatissima	Flint	1971
Philopotamidae	Chimarra	xingu	Blahnik	1997	x
Philopotamidae	Chimarra	ypsilon	Flint	1983
Philopotamidae	Wormaldia	planae	Ross & King	1956
Polycentropodidae	Cernotina	abreviatta	Flint	1971	x
Polycentropodidae	Cernotina	acalyptra	Flint	1971
Polycentropodidae	Cernotina	anhanguera	Camargos, Barcelos-Silva & Pes	2013	x
Polycentropodidae	Cernotina	antonina	Holzenthal & Almeida	2003	x
Polycentropodidae	Cernotina	aruma	Santos & Nessimian	2008	x
Polycentropodidae	Cernotina	attenuata	Flint	1971	x
Polycentropodidae	Cernotina	bibrachiata	Flint	1971
Polycentropodidae	Cernotina	bispicata	Camargos, Barcelos-Silva & Pes	2013	x
Polycentropodidae	Cernotina	cacha	Flint	1971
Polycentropodidae	Cernotina	cingulata	Flint	1971	x
Polycentropodidae	Cernotina	compressa	Flint	1971	x
Polycentropodidae	Cernotina	cygnea	Flint	1971
Polycentropodidae	Cernotina	cystophora	Flint	1971	x
Polycentropodidae	Cernotina	declinata	Flint	1971
Polycentropodidae	Cernotina	decumbens	Flint	1971	x
Polycentropodidae	Cernotina	ecotura	Sykora	1998	x
Polycentropodidae	Cernotina	encrypta	Flint	1971	x
Polycentropodidae	Cernotina	falcata	Camargos, Barcelos-Silva & Pes	2013	x
Polycentropodidae	Cernotina	filiformis	Flint	1971
Polycentropodidae	Cernotina	flexuosa	Santos & Nessimian	2008	x
Polycentropodidae	Cernotina	lanceolata	Barcelos-Silva, Camargos & Pes	2013	x
Polycentropodidae	Cernotina	lazzarii	Holzenthal & Almeida	2003	x
Polycentropodidae	Cernotina	lobisomem	Santos & Nessimian	2008	x
Polycentropodidae	Cernotina	longispina	Barcelos-Silva, Camargos & Pes	2013	x
Polycentropodidae	Cernotina	mandeba	Flint	1974
Polycentropodidae	Cernotina	obliqua	Flint	1971	x
Polycentropodidae	Cernotina	odonta	Santos & Nessimian	2008	x
Polycentropodidae	Cernotina	perpendicularis	Flint	1971
Polycentropodidae	Cernotina	pesae	Santos & Nessimian	2008	x
Polycentropodidae	Cernotina	puri	Dumas & Nessimian	2011	x
Polycentropodidae	Cernotina	sexpinosa	Flint	1983
Polycentropodidae	Cernotina	sinuosa	Barcelos-Silva, Camargos & Pes	2013	x
Polycentropodidae	Cernotina	spinigera	Flint	1971
Polycentropodidae	Cernotina	spinosior	Flint	1992
Polycentropodidae	Cernotina	subapicalis	Flint	1971
Polycentropodidae	Cernotina	trispina	Flint	1971	x
Polycentropodidae	Cernotina	uara	Flint	1971
Polycentropodidae	Cernotina	unguiculata	Flint	1971	x
Polycentropodidae	Cernotina	verticalis	Flint	1971	x
Polycentropodidae	Cyrnellus	arotron	Flint	1971
Polycentropodidae	Cyrnellus	bifidus	Flint	1971
Polycentropodidae	Cyrnellus	collaris	Flint	1971
Polycentropodidae	Cyrnellus	fraternus	(Banks)	1915
Polycentropodidae	Cyrnellus	mammillatus	Flint	1971
Polycentropodidae	Cyrnellus	rianus	Flint	1983
Polycentropodidae	Cyrnellus	risi	(Ulmer)	1907
Polycentropodidae	Cyrnellus	ulmeri	Flint	1971
Polycentropodidae	Nyctiophylax	neotropicalis	Flint	1971
Polycentropodidae	Polycentropus	acinaciformis	Hamilton & Holzenthal	2011	x
Polycentropodidae	Polycentropus	amphirhamphus	Hamilton & Holzenthal	2011	x
Polycentropodidae	Polycentropus	ancistrus	Hamilton & Holzenthal	2011	x
Polycentropodidae	Polycentropus	boraceia	Hamilton & Holzenthal	2011	x
Polycentropodidae	Polycentropus	brevicornutus	Vilarino & Calor	2015	x
Polycentropodidae	Polycentropus	caaete	Hamilton & Holzenthal	2011	x
Polycentropodidae	Polycentropus	cachoeira	Hamilton & Holzenthal	2011	x
Polycentropodidae	Polycentropus	carioca	Hamilton & Holzenthal	2011	x
Polycentropodidae	Polycentropus	carolae	Hamilton & Holzenthal	2011	x
Polycentropodidae	Polycentropus	cheliceratus	Hamilton & Holzenthal	2011	x
Polycentropodidae	Polycentropus	cipoensis	Hamilton & Holzenthal	2011	x
Polycentropodidae	Polycentropus	fluminensis	Hamilton & Holzenthal	2011	x
Polycentropodidae	Polycentropus	froehlichi	Hamilton & Holzenthal	2011	x
Polycentropodidae	Polycentropus	galharda	Hamilton & Holzenthal	2011	x
Polycentropodidae	Polycentropus	graciosa	Hamilton & Holzenthal	2011	x
Polycentropodidae	Polycentropus	inusitatus	Hamilton & Holzenthal	2011	x
Polycentropodidae	Polycentropus	itatiaia	Hamilton & Holzenthal	2011	x
Polycentropodidae	Polycentropus	minero	Hamilton & Holzenthal	2011	x
Polycentropodidae	Polycentropus	paprockii	Hamilton & Holzenthal	2011	x
Polycentropodidae	Polycentropus	rosalysae	Hamilton & Holzenthal	2011	x
Polycentropodidae	Polycentropus	santateresae	Hamilton & Holzenthal	2011	x
Polycentropodidae	Polycentropus	soniae	Hamilton & Holzenthal	2011	x
Polycentropodidae	Polycentropus	tripui	Hamilton & Holzenthal	2011	x
Polycentropodidae	Polycentropus	urubici	Holzenthal & Almeida	2003	x
Polycentropodidae	Polycentropus	verruculus	Hamilton & Holzenthal	2011	x
Polycentropodidae	Polycentropus	virginae	Hamilton & Holzenthal	2011	x
Polycentropodidae	Polyplectropus	alatespinus	Chamorro & Holzenthal	2010	x
Polycentropodidae	Polyplectropus	alleni	(Yamamoto)	1967
Polycentropodidae	Polyplectropus	anchorus	Vilarino & Calor	2015	x
Polycentropodidae	Polyplectropus	annulicornis	Ulmer	1905	x
Polycentropodidae	Polyplectropus	auriplicatus	Vilarino & Calor	2015	x
Polycentropodidae	Polyplectropus	banksianus	Flint	1971	x
Polycentropodidae	Polyplectropus	brachyscolus	Flint	1971
Polycentropodidae	Polyplectropus	brasilensis	Chamorro & Holzenthal	2010	x
Polycentropodidae	Polyplectropus	canastra	Rocha, Dumas & Nessimian	2016	x
Polycentropodidae	Polyplectropus	dubitatus	Flint	1983
Polycentropodidae	Polyplectropus	elongatus	(Yamamoto)	1966
Polycentropodidae	Polyplectropus	flavicornis	Ulmer	1905
Polycentropodidae	Polyplectropus	fuscatus	Flint	1983
Polycentropodidae	Polyplectropus	gaesum	Chamorro & Holzenthal	2010	x
Polycentropodidae	Polyplectropus	hamulus	Flint	1972
Polycentropodidae	Polyplectropus	hollyae	Chamorro & Holzenthal	2010	x
Polycentropodidae	Polyplectropus	hystricosus	Chamorro & Holzenthal	2010	x
Polycentropodidae	Polyplectropus	inarmatus	Flint	1971
Polycentropodidae	Polyplectropus	juliae	Chamorro & Holzenthal	2010	x
Polycentropodidae	Polyplectropus	matatlanticus	Chamorro & Holzenthal	2010	x
Polycentropodidae	Polyplectropus	minesium	Chamorro & Holzenthal	2010	x
Polycentropodidae	Polyplectropus	novafriburgensis	Chamorro & Holzenthal	2010	x
Polycentropodidae	Polyplectropus	petrae	Chamorro & Holzenthal	2010	x
Polycentropodidae	Polyplectropus	pratherae	Chamorro & Holzenthal	2010	x
Polycentropodidae	Polyplectropus	profaupar	Holzenthal & Almeida	2003	x
Polycentropodidae	Polyplectropus	rodmani	Chamorro & Holzenthal	2010	x
Polycentropodidae	Polyplectropus	rondoniensis	Chamorro & Holzenthal	2010	x
Polycentropodidae	Polyplectropus	spiculifer	Flint	1971	x
Polycentropodidae	Polyplectropus	tepequemensis	Gama Neto, Pes & Hamada	2017	x
Polycentropodidae	Polyplectropus	tragularius	Chamorro & Holzenthal	2010	x
Polycentropodidae	Polyplectropus	ulmeriana	Flint	1983
Sericostomatidae	Grumicha	grumicha	(Vallot)	1855
Sericostomatidae	Notidobiella	amazoniana	Holzenthal & Blahnik	2010	x
Sericostomatidae	Notidobiella	brasiliana	Holzenthal & Blahnik	2010	x
Xiphocentronidae	Machairocentron	falciforme	Pes & Hamada	2013	x
Xiphocentronidae	Xiphocentron	acqualume	Rocha, Dumas & Nessimian	2017	x
Xiphocentronidae	Xiphocentron	copacabana	Vilarino, Cavalcante, Dumas & Nessimian	2018	x
Xiphocentronidae	Xiphocentron	ilionea	Schmid	1982	x
Xiphocentronidae	Xiphocentron	jaguare	Rocha, Dumas & Nessimian	2017	x
Xiphocentronidae	Xiphocentron	kamakan	Vilarino & Calor	2015	x
Xiphocentronidae	Xiphocentron	maiteae	Vilarino & Calor	2015	x
Xiphocentronidae	Xiphocentron	maracanan	Vilarino, Cavalcante, Dumas & Nessimian	2018	x
Xiphocentronidae	Xiphocentron	redentor	Vilarino, Cavalcante, Dumas & Nessimian	2018	x
Xiphocentronidae	Xiphocentron	saltuum	(Müller)	1921	x
Xiphocentronidae	Xiphocentron	sclerothrix	Pes & Hamada	2013	x
Xiphocentronidae	Xiphocentron	steffeni	(Marlier)	1964	x
Xiphocentronidae	Xiphocentron	tijuca	Vilarino, Cavalcante, Dumas & Nessimian	2018	x
Incertae sedis	Eutonella	peltopsychodes	Müller	1921	x

## Sheet: biomes
Supplementary 1. List of Trichoptera species recorded to Brazil until August 2019, indicating endemic species to the country and respective distributional record through biomes, hydrographic regions, and Brazilian states. These data were available at Santos et al. 2019 http://fauna.jbrj.gov.br/fauna/faunadobrasil/278 [accessed on 02 September 2019]
Family	Genus	Species	Atlantic Forest	Amazon Forest	Caatinga	Cerrado	Pampa	Pantanal
Anomalopsychidae	Contulma	fluminensis	x
Anomalopsychidae	Contulma	meloi	x							Santos APM, Dumas LL, Henriques-Oliveira A, Souza WRM, Camargos LM, Calor AR, Pes AMO (2020)
Anomalopsychidae	Contulma	sana	x
Anomalopsychidae	Contulma	tijuca	x
Anomalopsychidae	Contulma	tripui	x
Anomalopsychidae	Contulma	vascaina	x
Atriplectididae	Neoatriplectides	desiderata	x
Calamoceratidae	Phylloicus	abdominalis	x		x
Calamoceratidae	Phylloicus	amazonas		x
Calamoceratidae	Phylloicus	angustior	x			x
Calamoceratidae	Phylloicus	auratus		x
Calamoceratidae	Phylloicus	bertioga	x
Calamoceratidae	Phylloicus	bidigitatus	x		x
Calamoceratidae	Phylloicus	brevior		x		x
Calamoceratidae	Phylloicus	bromeliarum	x
Calamoceratidae	Phylloicus	camargoi				x
Calamoceratidae	Phylloicus	dumasi		x
Calamoceratidae	Phylloicus	elektoros		x
Calamoceratidae	Phylloicus	fenestratus	x	x		x
Calamoceratidae	Phylloicus	flinti		x
Calamoceratidae	Phylloicus	major	x
Calamoceratidae	Phylloicus	medius	x
Calamoceratidae	Phylloicus	mirabilis	x
Calamoceratidae	Phylloicus	monneorum	x
Calamoceratidae	Phylloicus	obliquus	x		x
Calamoceratidae	Phylloicus	paprockii	x		x
Calamoceratidae	Phylloicus	pirapo			x
Calamoceratidae	Phylloicus	plaumanni	x
Calamoceratidae	Phylloicus	quadridigitatus	x
Calamoceratidae	Phylloicus	sallesi	x
Calamoceratidae	Phylloicus	tricalcaratus
Calamoceratidae	Phylloicus	yolandae	x
Ecnomidae	Austrotinodes	abrachium				x
Ecnomidae	Austrotinodes	absaberi	x
Ecnomidae	Austrotinodes	adolfolutzi				x
Ecnomidae	Austrotinodes	amazonensis		x		x
Ecnomidae	Austrotinodes	ariasi	x	x
Ecnomidae	Austrotinodes	belchioris	x
Ecnomidae	Austrotinodes	berthalitzae				x
Ecnomidae	Austrotinodes	bracteatus	x
Ecnomidae	Austrotinodes	carioca	x
Ecnomidae	Austrotinodes	chagasi	x
Ecnomidae	Austrotinodes	costalimai	x
Ecnomidae	Austrotinodes	cruzi	x
Ecnomidae	Austrotinodes	donagrazielae	x
Ecnomidae	Austrotinodes	gusmaoi	x
Ecnomidae	Austrotinodes	lattesi	x
Ecnomidae	Austrotinodes	lenti		x		x
Ecnomidae	Austrotinodes	longispinum	x
Ecnomidae	Austrotinodes	neblinensis		x
Ecnomidae	Austrotinodes	paraguayenis	x	x	x	x
Ecnomidae	Austrotinodes	prolixus	x
Ecnomidae	Austrotinodes	quintarellii	x
Ecnomidae	Austrotinodes	santosdumonti	x
Ecnomidae	Austrotinodes	taquaralis	x
Ecnomidae	Austrotinodes	tepui		x
Ecnomidae	Austrotinodes	uruguayensis	x
Ecnomidae	Austrotinodes	vanzolinii	x
Ecnomidae	Austrotinodes	vitalbrazili				x
Glossosomatidae	Canoptila	bifida	x
Glossosomatidae	Canoptila	williami	x
Glossosomatidae	Itauara	alexanderi	x
Glossosomatidae	Itauara	amazonica		x
Glossosomatidae	Itauara	blahniki	x
Glossosomatidae	Itauara	brasiliana	x
Glossosomatidae	Itauara	charlotta				x
Glossosomatidae	Itauara	emilia	x
Glossosomatidae	Itauara	flinti	x
Glossosomatidae	Itauara	jamesii	x			x
Glossosomatidae	Itauara	julia	x
Glossosomatidae	Itauara	lucinda	x
Glossosomatidae	Itauara	plaumanii	x
Glossosomatidae	Itauara	rodmani	x
Glossosomatidae	Itauara	simplex	x
Glossosomatidae	Itauara	stella	x
Glossosomatidae	Itauara	tusci	x
Glossosomatidae	Mortoniella	acauda	x
Glossosomatidae	Mortoniella	agosta	x			x
Glossosomatidae	Mortoniella	albolineata	x
Glossosomatidae	Mortoniella	alicula	x
Glossosomatidae	Mortoniella	asymmetris	x
Glossosomatidae	Mortoniella	bocaina	x
Glossosomatidae	Mortoniella	catarinensis	x
Glossosomatidae	Mortoniella	crescentis	x
Glossosomatidae	Mortoniella	dolonis	x			x
Glossosomatidae	Mortoniella	froehlichi	x
Glossosomatidae	Mortoniella	guahybae	x
Glossosomatidae	Mortoniella	hystricosa	x
Glossosomatidae	Mortoniella	intervales	x
Glossosomatidae	Mortoniella	latispina	x
Glossosomatidae	Mortoniella	longispina	x
Glossosomatidae	Mortoniella	meloi	x
Glossosomatidae	Mortoniella	ormina	x
Glossosomatidae	Mortoniella	parauna				x
Glossosomatidae	Mortoniella	paraunota	x
Glossosomatidae	Mortoniella	pumila	x			x
Glossosomatidae	Mortoniella	pusilla	x			x
Glossosomatidae	Mortoniella	teutona	x
Glossosomatidae	Mortoniella	tripuiensis	x			x
Glossosomatidae	Mortoniella	truncata				x
Glossosomatidae	Mortoniella	unota	x
Glossosomatidae	Mortoniella	uruguaiensis	x
Glossosomatidae	Protoptila	condylifera		x
Glossosomatidae	Protoptila	cora				x
Glossosomatidae	Protoptila	distischa		x
Glossosomatidae	Protoptila	dubitans	x
Glossosomatidae	Protoptila	ensifera		x
Glossosomatidae	Protoptila	flexispina		x
Glossosomatidae	Protoptila	longispinata		x
Glossosomatidae	Protoptila	macilenta		x
Glossosomatidae	Protoptila	mara		x
Glossosomatidae	Protoptila	simplex		x
Glossosomatidae	Protoptila	ternatia		x
Glossosomatidae	Protoptila	tetravittata		x
Glossosomatidae	Protoptila	trispicata		x
Glossosomatidae	Tolhuaca	brasiliensis	x
Helicopsychidae	Helicopsyche	amazona		x
Helicopsychidae	Helicopsyche	amica		x
Helicopsychidae	Helicopsyche	angeloi	x			x
Helicopsychidae	Helicopsyche	bedengo	x
Helicopsychidae	Helicopsyche	blahniki		x
Helicopsychidae	Helicopsyche	brazilia	x
Helicopsychidae	Helicopsyche	braziliensis
Helicopsychidae	Helicopsyche	carajas		x
Helicopsychidae	Helicopsyche	catoles			x
Helicopsychidae	Helicopsyche	cipoensis				x
Helicopsychidae	Helicopsyche	clara	x		x	x
Helicopsychidae	Helicopsyche	daome	x
Helicopsychidae	Helicopsyche	dinoprata	x
Helicopsychidae	Helicopsyche	flinti	x
Helicopsychidae	Helicopsyche	guara	x			x
Helicopsychidae	Helicopsyche	guariru	x
Helicopsychidae	Helicopsyche	helicoidella
Helicopsychidae	Helicopsyche	inflata		x
Helicopsychidae	Helicopsyche	lazzariae	x
Helicopsychidae	Helicopsyche	lobata	x
Helicopsychidae	Helicopsyche	luziae	x
Helicopsychidae	Helicopsyche	monda	x		x
Helicopsychidae	Helicopsyche	muelleri	x
Helicopsychidae	Helicopsyche	opalescens	x	x		x
Helicopsychidae	Helicopsyche	pandeirosa				x
Helicopsychidae	Helicopsyche	paprockii				x
Helicopsychidae	Helicopsyche	petri	x
Helicopsychidae	Helicopsyche	planorboides	x
Helicopsychidae	Helicopsyche	shaamanensu	x
Helicopsychidae	Helicopsyche	succinta	x
Helicopsychidae	Helicopsyche	timbira	x
Helicopsychidae	Helicopsyche	valligera	x
Helicopsychidae	Helicopsyche	vergelana	x	x	x	x
Helicopsychidae	Helicopsyche	xinguensis		x
Hydrobiosidae	Atopsyche	acahuana	x
Hydrobiosidae	Atopsyche	antisuya	x		x	x
Hydrobiosidae	Atopsyche	apurimac	x
Hydrobiosidae	Atopsyche	blahniki	x
Hydrobiosidae	Atopsyche	chirihuana	x
Hydrobiosidae	Atopsyche	diamantina			x	x
Hydrobiosidae	Atopsyche	erigia				x
Hydrobiosidae	Atopsyche	galharda	x
Hydrobiosidae	Atopsyche	hamata		x
Hydrobiosidae	Atopsyche	hatunpuna	x
Hydrobiosidae	Atopsyche	huacachaca	x
Hydrobiosidae	Atopsyche	huamachucu	x
Hydrobiosidae	Atopsyche	huanapu	x
Hydrobiosidae	Atopsyche	huarcu	x
Hydrobiosidae	Atopsyche	japi	x
Hydrobiosidae	Atopsyche	kamakan	x
Hydrobiosidae	Atopsyche	longipennis	x
Hydrobiosidae	Atopsyche	muelleri				x
Hydrobiosidae	Atopsyche	parauna				x
Hydrobiosidae	Atopsyche	plancki	x
Hydrobiosidae	Atopsyche	rinconi	x		x
Hydrobiosidae	Atopsyche	sanctipauli	x			x
Hydrobiosidae	Atopsyche	serica	x
Hydrobiosidae	Atopsyche	siolii		x
Hydrobiosidae	Atopsyche	urumarca	x			x
Hydrobiosidae	Atopsyche	usingeri	x
Hydrobiosidae	Atopsyche	zernyi	x			x
Hydropsychidae	Blepharopus	diaphanus	x	x	x	x	x
Hydropsychidae	Centromacronema	auripenne	x	x
Hydropsychidae	Centromacronema	obscurum	x
Hydropsychidae	Centromacronema	pioneira	x
Hydropsychidae	Centromacronema	poyanawa		x
Hydropsychidae	Leptonema	agraphum	x
Hydropsychidae	Leptonema	amazonense		x		x
Hydropsychidae	Leptonema	amplifurcatum	x
Hydropsychidae	Leptonema	aspersum		x		x
Hydropsychidae	Leptonema	aterrimum		x		x
Hydropsychidae	Leptonema	bifurcatodes	x
Hydropsychidae	Leptonema	bifurcatum	x
Hydropsychidae	Leptonema	boraceia	x
Hydropsychidae	Leptonema	columbianum		x		x	x
Hydropsychidae	Leptonema	crassum	x	x		x
Hydropsychidae	Leptonema	eugnathum	x
Hydropsychidae	Leptonema	ferelunatum	x
Hydropsychidae	Leptonema	lacuniferum		x
Hydropsychidae	Leptonema	lineaticorne	x
Hydropsychidae	Leptonema	lunatum	x
Hydropsychidae	Leptonema	macacu	x
Hydropsychidae	Leptonema	maculatum		x	x	x
Hydropsychidae	Leptonema	pallidum	x		x	x
Hydropsychidae	Leptonema	ramosum		x
Hydropsychidae	Leptonema	rostratum		x		x
Hydropsychidae	Leptonema	sancticaroli		x		x
Hydropsychidae	Leptonema	santosi	x
Hydropsychidae	Leptonema	serranum	x
Hydropsychidae	Leptonema	serratum	x
Hydropsychidae	Leptonema	sparsum	x	x		x	x
Hydropsychidae	Leptonema	speciosum	x
Hydropsychidae	Leptonema	spinulum		x	x
Hydropsychidae	Leptonema	stigmaticum	x
Hydropsychidae	Leptonema	tholloni	x
Hydropsychidae	Leptonema	tridens	x
Hydropsychidae	Leptonema	trispicatum	x
Hydropsychidae	Leptonema	viridianum	x	x	x	x
Hydropsychidae	Macronema	amazonense		x
Hydropsychidae	Macronema	argentilineatum		x		x
Hydropsychidae	Macronema	bicolor	x				x
Hydropsychidae	Macronema	burmeisteri		x
Hydropsychidae	Macronema	exophtalmum		x
Hydropsychidae	Macronema	fragile	x	x	x
Hydropsychidae	Macronema	fulvum	x
Hydropsychidae	Macronema	hageni	x	x
Hydropsychidae	Macronema	immaculatum	x
Hydropsychidae	Macronema	lachlani		x
Hydropsychidae	Macronema	lineatum	x
Hydropsychidae	Macronema	muelleri		x
Hydropsychidae	Macronema	paliferum				x
Hydropsychidae	Macronema	partitum	x		x
Hydropsychidae	Macronema	parvum		x
Hydropsychidae	Macronema	pennyi		x
Hydropsychidae	Macronema	percitans		x		x
Hydropsychidae	Macronema	pertyi		x		x
Hydropsychidae	Macronema	rubiginosum
Hydropsychidae	Macrostemum	araca		x
Hydropsychidae	Macrostemum	arcuatum		x		x
Hydropsychidae	Macrostemum	brasiliense	x
Hydropsychidae	Macrostemum	braueri		x
Hydropsychidae	Macrostemum	bravoi				x
Hydropsychidae	Macrostemum	digramma	x
Hydropsychidae	Macrostemum	erichsoni	x	x
Hydropsychidae	Macrostemum	hyalinum	x	x	x	x
Hydropsychidae	Macrostemum	negrense		x		x
Hydropsychidae	Macrostemum	nigrum	x
Hydropsychidae	Macrostemum	par	x
Hydropsychidae	Macrostemum	ramosum	x
Hydropsychidae	Macrostemum	santaeritae		x		x
Hydropsychidae	Macrostemum	surinamense		x
Hydropsychidae	Macrostemum	trigramma	x
Hydropsychidae	Macrostemum	triste	x
Hydropsychidae	Macrostemum	ulmeri	x	x	x	x
Hydropsychidae	Plectromacronema	comptum		x
Hydropsychidae	Plectromacronema	solaris				x
Hydropsychidae	Plectromacronema	subfuscum					x
Hydropsychidae	Pseudomacronema	vittatum		x
Hydropsychidae	Smicridea	abrupta		x
Hydropsychidae	Smicridea	aequalis		x	x
Hydropsychidae	Smicridea	albosignata	x
Hydropsychidae	Smicridea	appendiculata		x		x
Hydropsychidae	Smicridea	araguaiense				x
Hydropsychidae	Smicridea	atrobasis	x
Hydropsychidae	Smicridea	bicornuta				x
Hydropsychidae	Smicridea	bifasciata				x
Hydropsychidae	Smicridea	bivittata	x	x	x
Hydropsychidae	Smicridea	brasiliana	x
Hydropsychidae	Smicridea	caatinga			x
Hydropsychidae	Smicridea	caligata		x
Hydropsychidae	Smicridea	columbiana		x
Hydropsychidae	Smicridea	coronata	x		x	x
Hydropsychidae	Smicridea	dentifera	x
Hydropsychidae	Smicridea	dentiserrata				x
Hydropsychidae	Smicridea	discalis	x
Hydropsychidae	Smicridea	ephippifer		x		x
Hydropsychidae	Smicridea	erecta		x
Hydropsychidae	Smicridea	flinti		x		x
Hydropsychidae	Smicridea	forcipata	x
Hydropsychidae	Smicridea	franciscana			x	x
Hydropsychidae	Smicridea	froehlichi	x			x
Hydropsychidae	Smicridea	gemina	x
Hydropsychidae	Smicridea	gladiator		x
Hydropsychidae	Smicridea	helenae		x		x
Hydropsychidae	Smicridea	iguazu	x
Hydropsychidae	Smicridea	jundiai	x			x
Hydropsychidae	Smicridea	mangaratiba	x
Hydropsychidae	Smicridea	marlieri		x
Hydropsychidae	Smicridea	marua		x
Hydropsychidae	Smicridea	mesembrina				x
Hydropsychidae	Smicridea	mirnae	x
Hydropsychidae	Smicridea	necator				x
Hydropsychidae	Smicridea	obliqua		x		x
Hydropsychidae	Smicridea	palifera	x	x		x
Hydropsychidae	Smicridea	palmar	x		x	x
Hydropsychidae	Smicridea	paranensis	x		x
Hydropsychidae	Smicridea	piraya	x
Hydropsychidae	Smicridea	pseudolobata		x
Hydropsychidae	Smicridea	radula	x
Hydropsychidae	Smicridea	ralphi	x
Hydropsychidae	Smicridea	reinerti		x
Hydropsychidae	Smicridea	roraimense	x	x	x	x
Hydropsychidae	Smicridea	sattleri	x			x
Hydropsychidae	Smicridea	scutellaris		x
Hydropsychidae	Smicridea	sepala				x
Hydropsychidae	Smicridea	sexpinosa		x
Hydropsychidae	Smicridea	spinulosa	x
Hydropsychidae	Smicridea	truncata	x	x
Hydropsychidae	Smicridea	unguiculata	x			x
Hydropsychidae	Smicridea	vermiculata	x	x
Hydropsychidae	Smicridea	vilela		x
Hydropsychidae	Smicridea	voluta		x
Hydropsychidae	Smicridea	weidneri	x
Hydropsychidae	Synoestropsis	furcata		x		x
Hydropsychidae	Synoestropsis	grisoli		x		x	x
Hydropsychidae	Synoestropsis	obliqua	x				x
Hydropsychidae	Synoestropsis	pedicillata	x			x	x
Hydropsychidae	Synoestropsis	punctipennis	x	x
Hydropsychidae	Synoestropsis	stictonota	x
Hydroptilidae	Acostatrichia	brevipenis		x
Hydroptilidae	Acostatrichia	buborektala		x
Hydroptilidae	Acostatrichia	elvesta		x
Hydroptilidae	Acostatrichia	fluminensis	x
Hydroptilidae	Acostatrichia	ketvilla		x
Hydroptilidae	Acostatrichia	plaumanni	x
Hydroptilidae	Acostatrichia	simulans	x
Hydroptilidae	Acostatrichia	tuskera	x
Hydroptilidae	Alisotrichia	cacaulandia		x
Hydroptilidae	Alisotrichia	holzenthali				x
Hydroptilidae	Alisotrichia	macae	x
Hydroptilidae	Alisotrichia	nessimiani	x
Hydroptilidae	Alisotrichia	ubatuba	x
Hydroptilidae	Anchitrichia	duplifurcata	x			x
Hydroptilidae	Ascotrichia	adirecta	x		x
Hydroptilidae	Ascotrichia	frontalis	x	x
Hydroptilidae	Ascotrichia	hystricosa	x			x
Hydroptilidae	Ascotrichia	simoma	x
Hydroptilidae	Betrichia	bispinosa		x
Hydroptilidae	Betrichia	kagyla		x
Hydroptilidae	Betrichia	longistyla	x
Hydroptilidae	Betrichia	nhundiaquara	x		x	x
Hydroptilidae	Betrichia	uruguayensis		x
Hydroptilidae	Betrichia	varratlana		x
Hydroptilidae	Betrichia	zilbra	x
Hydroptilidae	Bredinia	espinosa		x		x
Hydroptilidae	Byrsopteryx	abrelata	x
Hydroptilidae	Byrsopteryx	carioca	x
Hydroptilidae	Byrsopteryx	espinhosa	x
Hydroptilidae	Costatrichia	hamulifera	x
Hydroptilidae	Costatrichia	ipixuna		x
Hydroptilidae	Costatrichia	nelsonferreirai		x
Hydroptilidae	Costatrichia	noite		x
Hydroptilidae	Dicaminus	ladislavii	x
Hydroptilidae	Flintiella	andreae			x
Hydroptilidae	Flintiella	astilla	x		x	x
Hydroptilidae	Flintiella	boraceia	x
Hydroptilidae	Flintiella	carajas		x
Hydroptilidae	Flintiella	harrisi			x
Hydroptilidae	Flintiella	manauara		x
Hydroptilidae	Flintiella	pallida				x
Hydroptilidae	Flintiella	pizotensis		x
Hydroptilidae	Hydroptila	argentinica	x
Hydroptilidae	Hydroptila	florestani			x
Hydroptilidae	Hydroptila	marighellai	x		x
Hydroptilidae	Hydroptila	producta	x
Hydroptilidae	Hydroptila	zerbinae	x
Hydroptilidae	Leucotrichia	alibrachia	x
Hydroptilidae	Leucotrichia	bicornuta	x
Hydroptilidae	Leucotrichia	brasiliana		x
Hydroptilidae	Metrichia	acuminata	x		x
Hydroptilidae	Metrichia	azul	x
Hydroptilidae	Metrichia	bonita				x
Hydroptilidae	Metrichia	bracui	x
Hydroptilidae	Metrichia	caraca				x
Hydroptilidae	Metrichia	circuliforme	x
Hydroptilidae	Metrichia	curta	x
Hydroptilidae	Metrichia	farofa				x
Hydroptilidae	Metrichia	forceps	x
Hydroptilidae	Metrichia	formosinha				x
Hydroptilidae	Metrichia	goiana				x
Hydroptilidae	Metrichia	itabaiana	x			x
Hydroptilidae	Metrichia	longissima	x
Hydroptilidae	Metrichia	peluda	x
Hydroptilidae	Metrichia	pernambucana	x		x
Hydroptilidae	Metrichia	rafaeli			x
Hydroptilidae	Metrichia	simples	x
Hydroptilidae	Metrichia	talhada			x
Hydroptilidae	Metrichia	tere	x
Hydroptilidae	Metrichia	ubajara			x
Hydroptilidae	Metrichia	vulgaris	x		x	x
Hydroptilidae	Neotrichia	abbreviata	x
Hydroptilidae	Neotrichia	bellinii		x
Hydroptilidae	Neotrichia	browni		x
Hydroptilidae	Neotrichia	colmillosa		x
Hydroptilidae	Neotrichia	didii		x
Hydroptilidae	Neotrichia	djalmasantosi		x
Hydroptilidae	Neotrichia	dubitans	x
Hydroptilidae	Neotrichia	durior	x
Hydroptilidae	Neotrichia	feolai		x
Hydroptilidae	Neotrichia	filifera	x
Hydroptilidae	Neotrichia	garrinchai		x
Hydroptilidae	Neotrichia	gilmari		x
Hydroptilidae	Neotrichia	longissima	x
Hydroptilidae	Neotrichia	niltonsantosi		x
Hydroptilidae	Neotrichia	noteuna	x
Hydroptilidae	Neotrichia	novara	x
Hydroptilidae	Neotrichia	orlandoi		x
Hydroptilidae	Neotrichia	ovona	x
Hydroptilidae	Neotrichia	pelei		x
Hydroptilidae	Neotrichia	rotundata		x
Hydroptilidae	Neotrichia	sicilicula	x
Hydroptilidae	Neotrichia	tertia	x
Hydroptilidae	Neotrichia	teutonia	x
Hydroptilidae	Neotrichia	vavai		x
Hydroptilidae	Neotrichia	zagalloi		x
Hydroptilidae	Neotrichia	zitoi		x
Hydroptilidae	Nothotrichia	tupi	x
Hydroptilidae	Ochrotrichia	caatinga	x		x
Hydroptilidae	Ochrotrichia	concha		x
Hydroptilidae	Ochrotrichia	constricta	x
Hydroptilidae	Ochrotrichia	igrapiuna	x			x
Hydroptilidae	Ochrotrichia	limeirai			x
Hydroptilidae	Ochrotrichia	manuensis	x
Hydroptilidae	Ochrotrichia	nematomorpha	x
Hydroptilidae	Ochrotrichia	patulosa	x		x
Hydroptilidae	Ochrotrichia	priapo	x
Hydroptilidae	Ochrotrichia	sagitta	x
Hydroptilidae	Ochrotrichia	taunay	x
Hydroptilidae	Orinocotrichia	angelus				x
Hydroptilidae	Oxyethira	bettyae			x
Hydroptilidae	Oxyethira	bicornuta		x
Hydroptilidae	Oxyethira	brasiliensis		x
Hydroptilidae	Oxyethira	calori				x
Hydroptilidae	Oxyethira	cascadanta				x
Hydroptilidae	Oxyethira	circaverna	x	x		x
Hydroptilidae	Oxyethira	diplospissa	x
Hydroptilidae	Oxyethira	discaelata		x
Hydroptilidae	Oxyethira	espinada	x
Hydroptilidae	Oxyethira	gracilianoi	x
Hydroptilidae	Oxyethira	guariba	x
Hydroptilidae	Oxyethira	hyalina	x
Hydroptilidae	Oxyethira	iannuzzae	x
Hydroptilidae	Oxyethira	lagunita	x
Hydroptilidae	Oxyethira	longipenis		x
Hydroptilidae	Oxyethira	longissima		x
Hydroptilidae	Oxyethira	luanae		x
Hydroptilidae	Oxyethira	macrosterna		x		x
Hydroptilidae	Oxyethira	maranhensis				x
Hydroptilidae	Oxyethira	merga	x	x
Hydroptilidae	Oxyethira	parce	x		x
Hydroptilidae	Oxyethira	peruviana		x
Hydroptilidae	Oxyethira	picita		x
Hydroptilidae	Oxyethira	presilla		x
Hydroptilidae	Oxyethira	quadrilobata				x
Hydroptilidae	Oxyethira	rafaeli			x
Hydroptilidae	Oxyethira	retrosa	x
Hydroptilidae	Oxyethira	santiagensis
Hydroptilidae	Oxyethira	septentrionalis			x
Hydroptilidae	Oxyethira	singularis				x
Hydroptilidae	Oxyethira	sinistra		x
Hydroptilidae	Oxyethira	spirogyrae	x
Hydroptilidae	Oxyethira	spissa		x
Hydroptilidae	Oxyethira	tica	x	x	x	x
Hydroptilidae	Oxyethira	una	x
Hydroptilidae	Oxyethira	zilaba	x
Hydroptilidae	Peltopsyche	antennata	x		x	x
Hydroptilidae	Peltopsyche	sieboldii	x
Hydroptilidae	Peltopsyche	squamosa	x
Hydroptilidae	Peltopsyche	vegosa	x
Hydroptilidae	Rhyacopsyche	angra	x
Hydroptilidae	Rhyacopsyche	bulbosa	x
Hydroptilidae	Rhyacopsyche	diacantha		x
Hydroptilidae	Rhyacopsyche	dikrosa	x
Hydroptilidae	Rhyacopsyche	hagenii	x
Hydroptilidae	Tricholeiochiton	neotropicalis		x
Hydroptilidae	Tupiniquintrichia	maclachlani	x
Hydroptilidae	Tupiniquintrichia	procera	x
Leptoceridae	Achoropsyche	duodecimpunctata	x	x		x
Leptoceridae	Amazonatolica	hamadae		x
Leptoceridae	Atanatolica	bonita	x
Leptoceridae	Atanatolica	brasiliana	x
Leptoceridae	Atanatolica	flinti	x
Leptoceridae	Atanatolica	nordestina			x
Leptoceridae	Grumichella	aequiunguis	x
Leptoceridae	Grumichella	boraceia	x			x
Leptoceridae	Grumichella	jureia	x
Leptoceridae	Grumichella	leccii	x
Leptoceridae	Grumichella	muelleri	x
Leptoceridae	Grumichella	paprockii	x			x
Leptoceridae	Grumichella	parati	x			x
Leptoceridae	Grumichella	rostrata	x			x
Leptoceridae	Nectopsyche	acutiloba	x			x
Leptoceridae	Nectopsyche	adusta	x
Leptoceridae	Nectopsyche	aureovittata	x			x
Leptoceridae	Nectopsyche	bella	x
Leptoceridae	Nectopsyche	bruchi	x			x
Leptoceridae	Nectopsyche	brunneofascia	x			x
Leptoceridae	Nectopsyche	diminuta		x
Leptoceridae	Nectopsyche	flavofasciata	x
Leptoceridae	Nectopsyche	fuscomaculata	x			x
Leptoceridae	Nectopsyche	gemma	x			x
Leptoceridae	Nectopsyche	gemmoides	x			x
Leptoceridae	Nectopsyche	jenseni		x
Leptoceridae	Nectopsyche	maculipennis				x
Leptoceridae	Nectopsyche	modesta	x
Leptoceridae	Nectopsyche	muelleri	x
Leptoceridae	Nectopsyche	muhni	x	x		x
Leptoceridae	Nectopsyche	multilineata		x
Leptoceridae	Nectopsyche	navasi	x
Leptoceridae	Nectopsyche	nigricapilla				x
Leptoceridae	Nectopsyche	ortizi	x	x		x
Leptoceridae	Nectopsyche	pantosticta	x			x
Leptoceridae	Nectopsyche	punctata	x	x		x
Leptoceridae	Nectopsyche	quatourguttata		x		x
Leptoceridae	Nectopsyche	separata	x			x
Leptoceridae	Nectopsyche	splendida	x	x		x
Leptoceridae	Neoathripsodes	anomalus	x
Leptoceridae	Neoathripsodes	holzenthali	x
Leptoceridae	Notalina	brasiliana	x			x
Leptoceridae	Notalina	cipo	x			x
Leptoceridae	Notalina	franciscana				x
Leptoceridae	Notalina	froehlichi	x
Leptoceridae	Notalina	goianensis				x
Leptoceridae	Notalina	hamiltoni	x
Leptoceridae	Notalina	jordanensis	x
Leptoceridae	Notalina	morsei	x
Leptoceridae	Notalina	paulista	x			x
Leptoceridae	Oecetis	acanthostema	x
Leptoceridae	Oecetis	acuticlasper	x
Leptoceridae	Oecetis	amazonica		x				x
Leptoceridae	Oecetis	angelae						x
Leptoceridae	Oecetis	blahniki		x
Leptoceridae	Oecetis	calori	x
Leptoceridae	Oecetis	carinata	x
Leptoceridae	Oecetis	cassicoleata				x
Leptoceridae	Oecetis	catagua				x
Leptoceridae	Oecetis	clavicornia	x
Leptoceridae	Oecetis	connata	x	x	x
Leptoceridae	Oecetis	danielae		x
Leptoceridae	Oecetis	doesburgi		x
Leptoceridae	Oecetis	dominguezi		x
Leptoceridae	Oecetis	excisa	x	x	x	x		x
Leptoceridae	Oecetis	fibra	x		x	x
Leptoceridae	Oecetis	flinti				x
Leptoceridae	Oecetis	froehlichi	x
Leptoceridae	Oecetis	furcata	x
Leptoceridae	Oecetis	gibbosa		x
Leptoceridae	Oecetis	iara	x
Leptoceridae	Oecetis	iguazu	x			x
Leptoceridae	Oecetis	inconspicua	x	x	x	x
Leptoceridae	Oecetis	knutsoni		x		x
Leptoceridae	Oecetis	machaera		x
Leptoceridae	Oecetis	martinae	x		x	x
Leptoceridae	Oecetis	paranensis	x		x			x
Leptoceridae	Oecetis	pertica		x
Leptoceridae	Oecetis	punctipennis	x	x	x	x
Leptoceridae	Oecetis	rafaeli		x
Leptoceridae	Triplectides	cipo			x	x
Leptoceridae	Triplectides	egleri		x
Leptoceridae	Triplectides	gracilis	x			x
Leptoceridae	Triplectides	itatiaia	x
Leptoceridae	Triplectides	maranhensis		x
Leptoceridae	Triplectides	misionensis	x
Leptoceridae	Triplectides	neotropicus	x			x
Leptoceridae	Triplectides	ultimus	x
Limnephilidae	Antarctoecia	brasiliensis	x
Odontoceridae	Anastomoneura	guahybae	x
Odontoceridae	Barypenthus	concolor	x			x
Odontoceridae	Marilia	aiuruoca	x
Odontoceridae	Marilia	alata		x	x
Odontoceridae	Marilia	albicornis
Odontoceridae	Marilia	caramuru				x
Odontoceridae	Marilia	elongata
Odontoceridae	Marilia	fasciculata		x	x
Odontoceridae	Marilia	flexuosa	x		x
Odontoceridae	Marilia	guaira		x		x
Odontoceridae	Marilia	huamantincoae	x
Odontoceridae	Marilia	infundibulum	x
Odontoceridae	Marilia	lateralis						x
Odontoceridae	Marilia	mahedae		x
Odontoceridae	Marilia	major	x
Odontoceridae	Marilia	minor	x			x
Odontoceridae	Marilia	paraguassu				x
Odontoceridae	Marilia	sioli		x
Odontoceridae	Marilia	truncata
Philopotamidae	Alterosa	affinis	x
Philopotamidae	Alterosa	amadoi	x
Philopotamidae	Alterosa	bandeira	x
Philopotamidae	Alterosa	beckeri	x
Philopotamidae	Alterosa	bilanceolata	x
Philopotamidae	Alterosa	bocainae	x
Philopotamidae	Alterosa	boraceiae	x
Philopotamidae	Alterosa	caissara	x
Philopotamidae	Alterosa	caparaonensis	x
Philopotamidae	Alterosa	capixaba	x
Philopotamidae	Alterosa	castroalvesi	x
Philopotamidae	Alterosa	catarinae	x
Philopotamidae	Alterosa	caymmii	x
Philopotamidae	Alterosa	escova	x
Philopotamidae	Alterosa	falcata	x
Philopotamidae	Alterosa	fimbriata	x
Philopotamidae	Alterosa	flinti	x
Philopotamidae	Alterosa	fluminensis	x
Philopotamidae	Alterosa	graciosa	x
Philopotamidae	Alterosa	guapimirim	x
Philopotamidae	Alterosa	holzenthali	x
Philopotamidae	Alterosa	inappendiculata	x
Philopotamidae	Alterosa	intervales	x
Philopotamidae	Alterosa	itatiaiae	x
Philopotamidae	Alterosa	jordanensis	x
Philopotamidae	Alterosa	marinonii	x
Philopotamidae	Alterosa	morato	x
Philopotamidae	Alterosa	nessimiani	x
Philopotamidae	Alterosa	orgaosensis	x
Philopotamidae	Alterosa	paprockii	x
Philopotamidae	Alterosa	paranaensis	x
Philopotamidae	Alterosa	polyacinata	x
Philopotamidae	Alterosa	ruschii	x
Philopotamidae	Alterosa	sanctaeteresae	x
Philopotamidae	Alterosa	sanctipauli	x
Philopotamidae	Alterosa	schadrackorum	x
Philopotamidae	Alterosa	spiesae	x
Philopotamidae	Alterosa	tripuiensis	x
Philopotamidae	Alterosa	truncata	x
Philopotamidae	Chimarra	adamsae		x
Philopotamidae	Chimarra	akantha		x
Philopotamidae	Chimarra	anticheira	x
Philopotamidae	Chimarra	aurivittata		x
Philopotamidae	Chimarra	beckeri	x
Philopotamidae	Chimarra	bidens				x
Philopotamidae	Chimarra	boraceia	x
Philopotamidae	Chimarra	brasiliana	x
Philopotamidae	Chimarra	burmeisteri	x
Philopotamidae	Chimarra	calori	x		x	x
Philopotamidae	Chimarra	camella	x			x
Philopotamidae	Chimarra	camposae				x
Philopotamidae	Chimarra	camura	x
Philopotamidae	Chimarra	centrispina				x
Philopotamidae	Chimarra	chela		x
Philopotamidae	Chimarra	cipoensis				x
Philopotamidae	Chimarra	conica	x	x	x	x		x
Philopotamidae	Chimarra	cultellata	x	x	x	x
Philopotamidae	Chimarra	curvipenis				x
Philopotamidae	Chimarra	diaksis		x
Philopotamidae	Chimarra	donamariae		x
Philopotamidae	Chimarra	fittkaui		x
Philopotamidae	Chimarra	froehlichi	x
Philopotamidae	Chimarra	gondela		x
Philopotamidae	Chimarra	guyanensis		x
Philopotamidae	Chimarra	heligma				x
Philopotamidae	Chimarra	heppneri		x		x
Philopotamidae	Chimarra	hyoeides	x	x	x
Philopotamidae	Chimarra	jugescens		x		x
Philopotamidae	Chimarra	kontilos	x
Philopotamidae	Chimarra	latiforceps	x
Philopotamidae	Chimarra	machadoi				x
Philopotamidae	Chimarra	majuscula	x
Philopotamidae	Chimarra	medioloba		x
Philopotamidae	Chimarra	mesodonta	x
Philopotamidae	Chimarra	morio	x
Philopotamidae	Chimarra	odonta	x
Philopotamidae	Chimarra	parana	x		x	x
Philopotamidae	Chimarra	paucispina		x
Philopotamidae	Chimarra	petersorum	x
Philopotamidae	Chimarra	petricola	x
Philopotamidae	Chimarra	plaumanni	x
Philopotamidae	Chimarra	quaternaria		x
Philopotamidae	Chimarra	scopuloides		x		x
Philopotamidae	Chimarra	simpliciforma		x
Philopotamidae	Chimarra	singularis		x
Philopotamidae	Chimarra	teresae	x
Philopotamidae	Chimarra	tortuosa		x
Philopotamidae	Chimarra	tucuna		x
Philopotamidae	Chimarra	uara	x	x	x	x
Philopotamidae	Chimarra	usitatissima	x	x		x
Philopotamidae	Chimarra	xingu		x
Philopotamidae	Chimarra	ypsilon	x
Philopotamidae	Wormaldia	planae		x
Polycentropodidae	Cernotina	abreviatta		x
Polycentropodidae	Cernotina	acalyptra		x
Polycentropodidae	Cernotina	anhanguera				x
Polycentropodidae	Cernotina	antonina	x		x
Polycentropodidae	Cernotina	aruma		x
Polycentropodidae	Cernotina	attenuata		x
Polycentropodidae	Cernotina	bibrachiata		x
Polycentropodidae	Cernotina	bispicata				x
Polycentropodidae	Cernotina	cacha	x	x
Polycentropodidae	Cernotina	cingulata		x
Polycentropodidae	Cernotina	compressa		x
Polycentropodidae	Cernotina	cygnea		x
Polycentropodidae	Cernotina	cystophora		x
Polycentropodidae	Cernotina	declinata		x
Polycentropodidae	Cernotina	decumbens		x
Polycentropodidae	Cernotina	ecotura		x
Polycentropodidae	Cernotina	encrypta		x
Polycentropodidae	Cernotina	falcata				x
Polycentropodidae	Cernotina	filiformis		x
Polycentropodidae	Cernotina	flexuosa		x
Polycentropodidae	Cernotina	lanceolata	x
Polycentropodidae	Cernotina	lazzarii	x
Polycentropodidae	Cernotina	lobisomem		x
Polycentropodidae	Cernotina	longispina	x
Polycentropodidae	Cernotina	mandeba		x
Polycentropodidae	Cernotina	obliqua		x
Polycentropodidae	Cernotina	odonta		x
Polycentropodidae	Cernotina	perpendicularis	x	x
Polycentropodidae	Cernotina	pesae		x
Polycentropodidae	Cernotina	puri	x
Polycentropodidae	Cernotina	sexpinosa	x
Polycentropodidae	Cernotina	sinuosa	x
Polycentropodidae	Cernotina	spinigera		x		x
Polycentropodidae	Cernotina	spinosior		x
Polycentropodidae	Cernotina	subapicalis		x
Polycentropodidae	Cernotina	trispina		x
Polycentropodidae	Cernotina	uara		x
Polycentropodidae	Cernotina	unguiculata		x
Polycentropodidae	Cernotina	verticalis		x
Polycentropodidae	Cyrnellus	arotron		x		x		x
Polycentropodidae	Cyrnellus	bifidus		x				x
Polycentropodidae	Cyrnellus	collaris		x
Polycentropodidae	Cyrnellus	fraternus	x	x	x	x		x
Polycentropodidae	Cyrnellus	mammillatus	x	x	x	x		x
Polycentropodidae	Cyrnellus	rianus				x
Polycentropodidae	Cyrnellus	risi	x	x
Polycentropodidae	Cyrnellus	ulmeri		x
Polycentropodidae	Nyctiophylax	neotropicalis	x	x	x
Polycentropodidae	Polycentropus	acinaciformis	x			x
Polycentropodidae	Polycentropus	amphirhamphus	x
Polycentropodidae	Polycentropus	ancistrus	x
Polycentropodidae	Polycentropus	boraceia	x
Polycentropodidae	Polycentropus	brevicornutus	x
Polycentropodidae	Polycentropus	caaete	x
Polycentropodidae	Polycentropus	cachoeira	x
Polycentropodidae	Polycentropus	carioca	x
Polycentropodidae	Polycentropus	carolae	x
Polycentropodidae	Polycentropus	cheliceratus	x
Polycentropodidae	Polycentropus	cipoensis	x			x
Polycentropodidae	Polycentropus	fluminensis	x
Polycentropodidae	Polycentropus	froehlichi	x
Polycentropodidae	Polycentropus	galharda	x
Polycentropodidae	Polycentropus	graciosa	x
Polycentropodidae	Polycentropus	inusitatus	x
Polycentropodidae	Polycentropus	itatiaia	x
Polycentropodidae	Polycentropus	minero	x			x
Polycentropodidae	Polycentropus	paprockii	x			x
Polycentropodidae	Polycentropus	rosalysae	x
Polycentropodidae	Polycentropus	santateresae	x
Polycentropodidae	Polycentropus	soniae	x
Polycentropodidae	Polycentropus	tripui	x
Polycentropodidae	Polycentropus	urubici	x
Polycentropodidae	Polycentropus	verruculus	x			x
Polycentropodidae	Polycentropus	virginae	x
Polycentropodidae	Polyplectropus	alatespinus	x
Polycentropodidae	Polyplectropus	alleni	x
Polycentropodidae	Polyplectropus	anchorus	x
Polycentropodidae	Polyplectropus	annulicornis	x
Polycentropodidae	Polyplectropus	auriplicatus	x
Polycentropodidae	Polyplectropus	banksianus		x
Polycentropodidae	Polyplectropus	brachyscolus		x
Polycentropodidae	Polyplectropus	brasilensis	x
Polycentropodidae	Polyplectropus	canastra				x
Polycentropodidae	Polyplectropus	dubitatus	x
Polycentropodidae	Polyplectropus	elongatus	x
Polycentropodidae	Polyplectropus	flavicornis	x			x
Polycentropodidae	Polyplectropus	fuscatus	x
Polycentropodidae	Polyplectropus	gaesum	x			x
Polycentropodidae	Polyplectropus	hamulus				x
Polycentropodidae	Polyplectropus	hollyae	x
Polycentropodidae	Polyplectropus	hystricosus	x
Polycentropodidae	Polyplectropus	inarmatus		x		x
Polycentropodidae	Polyplectropus	juliae	x			x
Polycentropodidae	Polyplectropus	matatlanticus	x
Polycentropodidae	Polyplectropus	minesium	x
Polycentropodidae	Polyplectropus	novafriburgensis	x
Polycentropodidae	Polyplectropus	petrae	x
Polycentropodidae	Polyplectropus	pratherae	x
Polycentropodidae	Polyplectropus	profaupar	x
Polycentropodidae	Polyplectropus	rodmani	x
Polycentropodidae	Polyplectropus	rondoniensis		x
Polycentropodidae	Polyplectropus	spiculifer		x
Polycentropodidae	Polyplectropus	tepequemensis		x
Polycentropodidae	Polyplectropus	tragularius	x			x
Polycentropodidae	Polyplectropus	ulmeriana	x
Sericostomatidae	Grumicha	grumicha	x
Sericostomatidae	Notidobiella	amazoniana		x
Sericostomatidae	Notidobiella	brasiliana	x
Xiphocentronidae	Machairocentron	falciforme		x
Xiphocentronidae	Xiphocentron	acqualume				x
Xiphocentronidae	Xiphocentron	copacabana	x
Xiphocentronidae	Xiphocentron	ilionea	x
Xiphocentronidae	Xiphocentron	jaguare				x
Xiphocentronidae	Xiphocentron	kamakan	x
Xiphocentronidae	Xiphocentron	maiteae	x
Xiphocentronidae	Xiphocentron	maracanan	x
Xiphocentronidae	Xiphocentron	redentor	x
Xiphocentronidae	Xiphocentron	saltuum	x
Xiphocentronidae	Xiphocentron	sclerothrix		x
Xiphocentronidae	Xiphocentron	steffeni	x
Xiphocentronidae	Xiphocentron	tijuca	x
incertae sedis	Eutonella	peltopsychodes

## Sheet: hydrographic
Supplementary 1. List of Trichoptera species recorded to Brazil until August 2019, indicating endemic species to the country and respective distributional record through biomes, hydrographic regions, and Brazilian states. These data were available at Santos et al. 2019 http://fauna.jbrj.gov.br/fauna/faunadobrasil/278 [accessed on 02 September 2019]
Family	Genus	Species	Southeast Atlantic	Amazon	East Atlantic	Eastern Northeast Atlantic	South Atlantic	Paraguay	Parana	Parnaiba	Sao Francisco	Tocantins-Araguaia	Uruguay	Western Northeast Atlantic
Anomalopsychidae	Contulma	fluminensis	x
Anomalopsychidae	Contulma	meloi							x							Santos APM, Dumas LL, Henriques-Oliveira A, Souza WRM, Camargos LM, Calor AR, Pes AMO (2020)
Anomalopsychidae	Contulma	sana	x
Anomalopsychidae	Contulma	tijuca	x
Anomalopsychidae	Contulma	tripui	x
Anomalopsychidae	Contulma	vascaina	x
Atriplectididae	Neoatriplectides	desiderata	x
Calamoceratidae	Phylloicus	abdominalis	x				x
Calamoceratidae	Phylloicus	amazonas		x
Calamoceratidae	Phylloicus	angustior	x				x		x		x		x
Calamoceratidae	Phylloicus	auratus		x
Calamoceratidae	Phylloicus	bertioga	x
Calamoceratidae	Phylloicus	bidigitatus	x		x				x	x
Calamoceratidae	Phylloicus	brevior		x								x
Calamoceratidae	Phylloicus	bromeliarum	x									x	x
Calamoceratidae	Phylloicus	camargoi							x
Calamoceratidae	Phylloicus	dumasi		x
Calamoceratidae	Phylloicus	elektoros		x
Calamoceratidae	Phylloicus	fenestratus		x		x			x			x
Calamoceratidae	Phylloicus	flinti		x
Calamoceratidae	Phylloicus	major	x						x
Calamoceratidae	Phylloicus	medius
Calamoceratidae	Phylloicus	mirabilis	x
Calamoceratidae	Phylloicus	monneorum	x		x
Calamoceratidae	Phylloicus	obliquus	x							x
Calamoceratidae	Phylloicus	paprockii			x						x
Calamoceratidae	Phylloicus	pirapo								x
Calamoceratidae	Phylloicus	plaumanni											x
Calamoceratidae	Phylloicus	quadridigitatus	x
Calamoceratidae	Phylloicus	sallesi	x
Calamoceratidae	Phylloicus	tricalcaratus
Calamoceratidae	Phylloicus	yolandae							x
Ecnomidae	Austrotinodes	abrachium									x
Ecnomidae	Austrotinodes	absaberi									x
Ecnomidae	Austrotinodes	adolfolutzi									x
Ecnomidae	Austrotinodes	amazonensis		x					x
Ecnomidae	Austrotinodes	ariasi		x								x
Ecnomidae	Austrotinodes	belchioris			x
Ecnomidae	Austrotinodes	berthalitzae						x
Ecnomidae	Austrotinodes	bracteatus			x
Ecnomidae	Austrotinodes	carioca	x
Ecnomidae	Austrotinodes	chagasi	x				x		x
Ecnomidae	Austrotinodes	costalimai							x
Ecnomidae	Austrotinodes	cruzi	x
Ecnomidae	Austrotinodes	donagrazielae	x
Ecnomidae	Austrotinodes	gusmaoi	x
Ecnomidae	Austrotinodes	lattesi	x				x		x
Ecnomidae	Austrotinodes	lenti		x							x
Ecnomidae	Austrotinodes	longispinum	x
Ecnomidae	Austrotinodes	neblinensis		x
Ecnomidae	Austrotinodes	paraguayenis			x	x				x	x	x
Ecnomidae	Austrotinodes	prolixus			x
Ecnomidae	Austrotinodes	quintarellii	x
Ecnomidae	Austrotinodes	santosdumonti	x
Ecnomidae	Austrotinodes	taquaralis	x		x
Ecnomidae	Austrotinodes	tepui		x
Ecnomidae	Austrotinodes	uruguayensis							x
Ecnomidae	Austrotinodes	vanzolinii	x
Ecnomidae	Austrotinodes	vitalbrazili									x
Glossosomatidae	Canoptila	bifida											x
Glossosomatidae	Canoptila	williami					x		x
Glossosomatidae	Itauara	alexanderi	x
Glossosomatidae	Itauara	amazonica		x
Glossosomatidae	Itauara	blahniki							x
Glossosomatidae	Itauara	brasiliana											x
Glossosomatidae	Itauara	charlotta									x
Glossosomatidae	Itauara	emilia							x
Glossosomatidae	Itauara	flinti							x
Glossosomatidae	Itauara	jamesii	x
Glossosomatidae	Itauara	julia	x
Glossosomatidae	Itauara	lucinda	x
Glossosomatidae	Itauara	plaumanii											x
Glossosomatidae	Itauara	rodmani							x
Glossosomatidae	Itauara	simplex	x
Glossosomatidae	Itauara	stella							x
Glossosomatidae	Itauara	tusci	x
Glossosomatidae	Mortoniella	acauda											x
Glossosomatidae	Mortoniella	agosta	x		x
Glossosomatidae	Mortoniella	albolineata					x		x
Glossosomatidae	Mortoniella	alicula	x
Glossosomatidae	Mortoniella	asymmetris				x
Glossosomatidae	Mortoniella	bocaina	x
Glossosomatidae	Mortoniella	catarinensis											x
Glossosomatidae	Mortoniella	crescentis	x
Glossosomatidae	Mortoniella	dolonis	x						x
Glossosomatidae	Mortoniella	froehlichi	x
Glossosomatidae	Mortoniella	guahybae							x
Glossosomatidae	Mortoniella	hystricosa					x
Glossosomatidae	Mortoniella	intervales							x
Glossosomatidae	Mortoniella	latispina	x
Glossosomatidae	Mortoniella	longispina											x
Glossosomatidae	Mortoniella	meloi							x
Glossosomatidae	Mortoniella	ormina											x
Glossosomatidae	Mortoniella	parauna									x
Glossosomatidae	Mortoniella	paraunota											x
Glossosomatidae	Mortoniella	pumila	x		x
Glossosomatidae	Mortoniella	pusilla	x		x
Glossosomatidae	Mortoniella	teutona	x				x		x				x
Glossosomatidae	Mortoniella	tripuiensis	x
Glossosomatidae	Mortoniella	truncata									x
Glossosomatidae	Mortoniella	unota											x
Glossosomatidae	Mortoniella	uruguaiensis											x
Glossosomatidae	Protoptila	condylifera		x
Glossosomatidae	Protoptila	cora
Glossosomatidae	Protoptila	distischa		x
Glossosomatidae	Protoptila	dubitans											x
Glossosomatidae	Protoptila	ensifera		x
Glossosomatidae	Protoptila	flexispina		x
Glossosomatidae	Protoptila	longispinata		x
Glossosomatidae	Protoptila	macilenta										x
Glossosomatidae	Protoptila	mara		x
Glossosomatidae	Protoptila	simplex		x								x
Glossosomatidae	Protoptila	ternatia		x
Glossosomatidae	Protoptila	tetravittata		x
Glossosomatidae	Protoptila	trispicata		x
Glossosomatidae	Tolhuaca	brasiliensis							x
Helicopsychidae	Helicopsyche	amazona		x
Helicopsychidae	Helicopsyche	amica		x
Helicopsychidae	Helicopsyche	angeloi	x		x				x
Helicopsychidae	Helicopsyche	bedengo	x
Helicopsychidae	Helicopsyche	blahniki		x
Helicopsychidae	Helicopsyche	brazilia	x
Helicopsychidae	Helicopsyche	braziliensis
Helicopsychidae	Helicopsyche	carajas										x
Helicopsychidae	Helicopsyche	catoles			x
Helicopsychidae	Helicopsyche	cipoensis									x
Helicopsychidae	Helicopsyche	clara				x					x
Helicopsychidae	Helicopsyche	daome	x
Helicopsychidae	Helicopsyche	dinoprata	x
Helicopsychidae	Helicopsyche	flinti											x
Helicopsychidae	Helicopsyche	guara					x				x
Helicopsychidae	Helicopsyche	guariru	x		x
Helicopsychidae	Helicopsyche	helicoidella
Helicopsychidae	Helicopsyche	inflata										x
Helicopsychidae	Helicopsyche	lazzariae							x
Helicopsychidae	Helicopsyche	lobata	x										x
Helicopsychidae	Helicopsyche	luziae	x
Helicopsychidae	Helicopsyche	monda								x
Helicopsychidae	Helicopsyche	muelleri											x
Helicopsychidae	Helicopsyche	opalescens		x										x
Helicopsychidae	Helicopsyche	pandeirosa									x
Helicopsychidae	Helicopsyche	paprockii									x			x
Helicopsychidae	Helicopsyche	petri	x
Helicopsychidae	Helicopsyche	planorboides	x
Helicopsychidae	Helicopsyche	shaamanensu	x
Helicopsychidae	Helicopsyche	succinta			x
Helicopsychidae	Helicopsyche	timbira	x						x
Helicopsychidae	Helicopsyche	valligera											x
Helicopsychidae	Helicopsyche	vergelana		x		x				x		x		x
Helicopsychidae	Helicopsyche	xinguensis		x
Hydrobiosidae	Atopsyche	acahuana	x
Hydrobiosidae	Atopsyche	antisuya			x	x					x
Hydrobiosidae	Atopsyche	apurimac	x				x
Hydrobiosidae	Atopsyche	blahniki	x
Hydrobiosidae	Atopsyche	chirihuana	x
Hydrobiosidae	Atopsyche	diamantina			x				x
Hydrobiosidae	Atopsyche	erigia							x		x
Hydrobiosidae	Atopsyche	galharda	x
Hydrobiosidae	Atopsyche	hamata		x
Hydrobiosidae	Atopsyche	hatunpuna							x
Hydrobiosidae	Atopsyche	huacachaca	x
Hydrobiosidae	Atopsyche	huamachucu	x
Hydrobiosidae	Atopsyche	huanapu	x						x
Hydrobiosidae	Atopsyche	huarcu	x
Hydrobiosidae	Atopsyche	japi							x
Hydrobiosidae	Atopsyche	kamakan			x
Hydrobiosidae	Atopsyche	longipennis					x
Hydrobiosidae	Atopsyche	muelleri										x
Hydrobiosidae	Atopsyche	parauna									x
Hydrobiosidae	Atopsyche	plancki	x				x
Hydrobiosidae	Atopsyche	rinconi			x				x
Hydrobiosidae	Atopsyche	sanctipauli	x				x		x		x		x
Hydrobiosidae	Atopsyche	serica					x
Hydrobiosidae	Atopsyche	siolii		x
Hydrobiosidae	Atopsyche	urumarca							x		x	x
Hydrobiosidae	Atopsyche	usingeri	x
Hydrobiosidae	Atopsyche	zernyi	x				x
Hydropsychidae	Blepharopus	diaphanus	x	x	x	x			x		x	x	x	x
Hydropsychidae	Centromacronema	auripenne	x	x			x	x					x
Hydropsychidae	Centromacronema	obscurum	x				x				x
Hydropsychidae	Centromacronema	pioneira			x
Hydropsychidae	Centromacronema	poyanawa		x
Hydropsychidae	Leptonema	agraphum	x
Hydropsychidae	Leptonema	amazonense		x								x
Hydropsychidae	Leptonema	amplifurcatum	x
Hydropsychidae	Leptonema	aspersum	x	x							x	x
Hydropsychidae	Leptonema	aterrimum		x						x		x
Hydropsychidae	Leptonema	bifurcatodes	x
Hydropsychidae	Leptonema	bifurcatum	x
Hydropsychidae	Leptonema	boraceia	x
Hydropsychidae	Leptonema	columbianum		x						x		x		x
Hydropsychidae	Leptonema	crassum		x	x							x		x
Hydropsychidae	Leptonema	eugnathum					x		x
Hydropsychidae	Leptonema	ferelunatum			x
Hydropsychidae	Leptonema	lacuniferum		x
Hydropsychidae	Leptonema	lineaticorne												x
Hydropsychidae	Leptonema	lunatum					x
Hydropsychidae	Leptonema	macacu			x
Hydropsychidae	Leptonema	maculatum		x						x		x		x
Hydropsychidae	Leptonema	pallidum	x		x				x	x	x	x		x
Hydropsychidae	Leptonema	ramosum		x
Hydropsychidae	Leptonema	rostratum		x				x
Hydropsychidae	Leptonema	sancticaroli		x						x		x
Hydropsychidae	Leptonema	santosi	x
Hydropsychidae	Leptonema	serranum	x						x
Hydropsychidae	Leptonema	serratum	x
Hydropsychidae	Leptonema	sparsum	x	x			x	x	x	x	x	x	x	x
Hydropsychidae	Leptonema	speciosum	x
Hydropsychidae	Leptonema	spinulum		x				x		x
Hydropsychidae	Leptonema	stigmaticum	x
Hydropsychidae	Leptonema	tholloni	x
Hydropsychidae	Leptonema	tridens	x						x		x
Hydropsychidae	Leptonema	trispicatum	x
Hydropsychidae	Leptonema	viridianum	x	x	x	x				x		x
Hydropsychidae	Macronema	amazonense		x
Hydropsychidae	Macronema	argentilineatum		x						x		x		x
Hydropsychidae	Macronema	bicolor	x				x	x					x
Hydropsychidae	Macronema	burmeisteri		x
Hydropsychidae	Macronema	exophtalmum		x
Hydropsychidae	Macronema	fragile		x	x
Hydropsychidae	Macronema	fulvum	x
Hydropsychidae	Macronema	hageni		x				x		x	x			x
Hydropsychidae	Macronema	immaculatum	x						x
Hydropsychidae	Macronema	lachlani		x
Hydropsychidae	Macronema	lineatum			x
Hydropsychidae	Macronema	muelleri		x
Hydropsychidae	Macronema	paliferum										x
Hydropsychidae	Macronema	partitum	x		x		x		x
Hydropsychidae	Macronema	parvum		x
Hydropsychidae	Macronema	pennyi		x
Hydropsychidae	Macronema	percitans		x								x		x
Hydropsychidae	Macronema	pertyi		x								x
Hydropsychidae	Macronema	rubiginosum
Hydropsychidae	Macrostemum	araca		x
Hydropsychidae	Macrostemum	arcuatum		x								x
Hydropsychidae	Macrostemum	brasiliense	x		x				x
Hydropsychidae	Macrostemum	braueri		x
Hydropsychidae	Macrostemum	bravoi										x		x
Hydropsychidae	Macrostemum	digramma	x
Hydropsychidae	Macrostemum	erichsoni	x	x	x
Hydropsychidae	Macrostemum	hyalinum	x	x	x	x				x		x		x
Hydropsychidae	Macrostemum	negrense		x								x
Hydropsychidae	Macrostemum	nigrum			x
Hydropsychidae	Macrostemum	par	x
Hydropsychidae	Macrostemum	ramosum	x
Hydropsychidae	Macrostemum	santaeritae		x								x
Hydropsychidae	Macrostemum	surinamense		x
Hydropsychidae	Macrostemum	trigramma	x
Hydropsychidae	Macrostemum	triste	x
Hydropsychidae	Macrostemum	ulmeri	x	x		x				x		x		x
Hydropsychidae	Plectromacronema	comptum		x
Hydropsychidae	Plectromacronema	solaris			x
Hydropsychidae	Plectromacronema	subfuscum											x
Hydropsychidae	Pseudomacronema	vittatum		x
Hydropsychidae	Smicridea	abrupta		x
Hydropsychidae	Smicridea	aequalis								x		x
Hydropsychidae	Smicridea	albosignata	x		x		x		x
Hydropsychidae	Smicridea	appendiculata		x								x		x
Hydropsychidae	Smicridea	araguaiense										x
Hydropsychidae	Smicridea	atrobasis							x
Hydropsychidae	Smicridea	bicornuta										x
Hydropsychidae	Smicridea	bifasciata										x
Hydropsychidae	Smicridea	bivittata	x	x						x
Hydropsychidae	Smicridea	brasiliana							x
Hydropsychidae	Smicridea	caatinga								x
Hydropsychidae	Smicridea	caligata		x
Hydropsychidae	Smicridea	columbiana		x
Hydropsychidae	Smicridea	coronata	x		x		x		x	x		x
Hydropsychidae	Smicridea	dentifera							x
Hydropsychidae	Smicridea	dentiserrata										x
Hydropsychidae	Smicridea	discalis							x
Hydropsychidae	Smicridea	ephippifer		x								x
Hydropsychidae	Smicridea	erecta		x
Hydropsychidae	Smicridea	flinti		x								x
Hydropsychidae	Smicridea	forcipata							x
Hydropsychidae	Smicridea	franciscana								x	x
Hydropsychidae	Smicridea	froehlichi	x									x
Hydropsychidae	Smicridea	gemina	x
Hydropsychidae	Smicridea	gladiator		x
Hydropsychidae	Smicridea	helenae		x								x		x
Hydropsychidae	Smicridea	iguazu	x						x
Hydropsychidae	Smicridea	jundiai	x		x				x			x
Hydropsychidae	Smicridea	mangaratiba	x
Hydropsychidae	Smicridea	marlieri		x
Hydropsychidae	Smicridea	marua		x
Hydropsychidae	Smicridea	mesembrina										x
Hydropsychidae	Smicridea	mirnae							x
Hydropsychidae	Smicridea	necator									x
Hydropsychidae	Smicridea	obliqua		x										x
Hydropsychidae	Smicridea	palifera	x	x	x	x					x	x		x
Hydropsychidae	Smicridea	palmar	x		x	x					x	x		x
Hydropsychidae	Smicridea	paranensis	x						x	x
Hydropsychidae	Smicridea	piraya	x		x				x
Hydropsychidae	Smicridea	pseudolobata		x								x
Hydropsychidae	Smicridea	radula	x						x
Hydropsychidae	Smicridea	ralphi	x						x
Hydropsychidae	Smicridea	reinerti		x
Hydropsychidae	Smicridea	roraimense	x	x	x	x					x			x
Hydropsychidae	Smicridea	sattleri	x								x
Hydropsychidae	Smicridea	scutellaris		x
Hydropsychidae	Smicridea	sepala							x
Hydropsychidae	Smicridea	sexpinosa		x
Hydropsychidae	Smicridea	spinulosa					x		x
Hydropsychidae	Smicridea	truncata		x
Hydropsychidae	Smicridea	unguiculata							x				x
Hydropsychidae	Smicridea	vermiculata							x			x	x
Hydropsychidae	Smicridea	vilela		x
Hydropsychidae	Smicridea	voluta		x
Hydropsychidae	Smicridea	weidneri					x
Hydropsychidae	Synoestropsis	furcata		x						x		x		x
Hydropsychidae	Synoestropsis	grisoli		x	x			x	x		x		x	x
Hydropsychidae	Synoestropsis	obliqua											x
Hydropsychidae	Synoestropsis	pedicillata			x	x			x	x	x		x	x
Hydropsychidae	Synoestropsis	punctipennis		x	x
Hydropsychidae	Synoestropsis	stictonota					x						x
Hydroptilidae	Acostatrichia	brevipenis		x
Hydroptilidae	Acostatrichia	buborektala		x
Hydroptilidae	Acostatrichia	elvesta		x
Hydroptilidae	Acostatrichia	fluminensis	x
Hydroptilidae	Acostatrichia	ketvilla		x
Hydroptilidae	Acostatrichia	plaumanni											x
Hydroptilidae	Acostatrichia	simulans											x
Hydroptilidae	Acostatrichia	tuskera							x
Hydroptilidae	Alisotrichia	cacaulandia		x
Hydroptilidae	Alisotrichia	holzenthali									x
Hydroptilidae	Alisotrichia	macae	x
Hydroptilidae	Alisotrichia	nessimiani	x
Hydroptilidae	Alisotrichia	ubatuba	x
Hydroptilidae	Anchitrichia	duplifurcata	x								x
Hydroptilidae	Ascotrichia	adirecta			x						x
Hydroptilidae	Ascotrichia	frontalis	x	x
Hydroptilidae	Ascotrichia	hystricosa	x						x		x
Hydroptilidae	Ascotrichia	simoma							x		x
Hydroptilidae	Betrichia	bispinosa		x								x
Hydroptilidae	Betrichia	kagyla		x
Hydroptilidae	Betrichia	longistyla											x
Hydroptilidae	Betrichia	nhundiaquara			x		x			x	x
Hydroptilidae	Betrichia	uruguayensis		x
Hydroptilidae	Betrichia	varratlana		x
Hydroptilidae	Betrichia	zilbra			x								x
Hydroptilidae	Bredinia	espinosa		x				x
Hydroptilidae	Byrsopteryx	abrelata	x						x
Hydroptilidae	Byrsopteryx	carioca	x
Hydroptilidae	Byrsopteryx	espinhosa	x
Hydroptilidae	Costatrichia	hamulifera							x				x
Hydroptilidae	Costatrichia	ipixuna		x
Hydroptilidae	Costatrichia	nelsonferreirai										x
Hydroptilidae	Costatrichia	noite		x
Hydroptilidae	Dicaminus	ladislavii											x
Hydroptilidae	Flintiella	andreae				x
Hydroptilidae	Flintiella	astilla						x	x		x
Hydroptilidae	Flintiella	boraceia							x
Hydroptilidae	Flintiella	carajas										x
Hydroptilidae	Flintiella	harrisi								x
Hydroptilidae	Flintiella	manauara		x
Hydroptilidae	Flintiella	pallida										x		x
Hydroptilidae	Flintiella	pizotensis		x
Hydroptilidae	Hydroptila	argentinica	x				x		x				x
Hydroptilidae	Hydroptila	florestani								x
Hydroptilidae	Hydroptila	marighellai								x
Hydroptilidae	Hydroptila	producta			x								x
Hydroptilidae	Hydroptila	zerbinae			x	x
Hydroptilidae	Leucotrichia	alibrachia	x
Hydroptilidae	Leucotrichia	bicornuta	x
Hydroptilidae	Leucotrichia	brasiliana		x
Hydroptilidae	Metrichia	acuminata				x				x
Hydroptilidae	Metrichia	azul							x
Hydroptilidae	Metrichia	bonita						x
Hydroptilidae	Metrichia	bracui	x
Hydroptilidae	Metrichia	caraca									x
Hydroptilidae	Metrichia	circuliforme	x
Hydroptilidae	Metrichia	curta	x
Hydroptilidae	Metrichia	farofa									x
Hydroptilidae	Metrichia	forceps							x
Hydroptilidae	Metrichia	formosinha						x
Hydroptilidae	Metrichia	goiana										x
Hydroptilidae	Metrichia	itabaiana			x							x
Hydroptilidae	Metrichia	longissima	x
Hydroptilidae	Metrichia	peluda	x
Hydroptilidae	Metrichia	pernambucana				x
Hydroptilidae	Metrichia	rafaeli								x
Hydroptilidae	Metrichia	simples							x
Hydroptilidae	Metrichia	talhada				x
Hydroptilidae	Metrichia	tere	x
Hydroptilidae	Metrichia	ubajara								x
Hydroptilidae	Metrichia	vulgaris	x							x	x	x
Hydroptilidae	Neotrichia	abbreviata											x
Hydroptilidae	Neotrichia	bellinii		x
Hydroptilidae	Neotrichia	browni		x
Hydroptilidae	Neotrichia	colmillosa		x
Hydroptilidae	Neotrichia	didii		x
Hydroptilidae	Neotrichia	djalmasantosi		x
Hydroptilidae	Neotrichia	dubitans	x										x
Hydroptilidae	Neotrichia	durior											x
Hydroptilidae	Neotrichia	feolai		x
Hydroptilidae	Neotrichia	filifera				x					x
Hydroptilidae	Neotrichia	garrinchai		x
Hydroptilidae	Neotrichia	gilmari		x
Hydroptilidae	Neotrichia	longissima											x
Hydroptilidae	Neotrichia	niltonsantosi		x
Hydroptilidae	Neotrichia	noteuna											x
Hydroptilidae	Neotrichia	novara											x
Hydroptilidae	Neotrichia	orlandoi		x
Hydroptilidae	Neotrichia	ovona											x
Hydroptilidae	Neotrichia	pelei		x
Hydroptilidae	Neotrichia	rotundata		x
Hydroptilidae	Neotrichia	sicilicula											x
Hydroptilidae	Neotrichia	tertia											x
Hydroptilidae	Neotrichia	teutonia											x
Hydroptilidae	Neotrichia	vavai		x
Hydroptilidae	Neotrichia	zagalloi		x
Hydroptilidae	Neotrichia	zitoi		x
Hydroptilidae	Nothotrichia	tupi	x
Hydroptilidae	Ochrotrichia	caatinga	x							x
Hydroptilidae	Ochrotrichia	concha		x
Hydroptilidae	Ochrotrichia	constricta			x
Hydroptilidae	Ochrotrichia	igrapiuna			x							x
Hydroptilidae	Ochrotrichia	limeirai								x
Hydroptilidae	Ochrotrichia	manuensis			x
Hydroptilidae	Ochrotrichia	nematomorpha	x
Hydroptilidae	Ochrotrichia	patulosa	x							x
Hydroptilidae	Ochrotrichia	priapo			x
Hydroptilidae	Ochrotrichia	sagitta	x
Hydroptilidae	Ochrotrichia	taunay	x
Hydroptilidae	Orinocotrichia	angelus										x
Hydroptilidae	Oxyethira	bettyae									x
Hydroptilidae	Oxyethira	bicornuta		x
Hydroptilidae	Oxyethira	brasiliensis		x
Hydroptilidae	Oxyethira	calori									x
Hydroptilidae	Oxyethira	cascadanta									x
Hydroptilidae	Oxyethira	circaverna		x	x	x						x
Hydroptilidae	Oxyethira	diplospissa				x
Hydroptilidae	Oxyethira	discaelata		x
Hydroptilidae	Oxyethira	espinada				x
Hydroptilidae	Oxyethira	gracilianoi			x	x
Hydroptilidae	Oxyethira	guariba				x
Hydroptilidae	Oxyethira	hyalina											x
Hydroptilidae	Oxyethira	iannuzzae			x	x
Hydroptilidae	Oxyethira	lagunita							x
Hydroptilidae	Oxyethira	longipenis		x
Hydroptilidae	Oxyethira	longissima		x
Hydroptilidae	Oxyethira	luanae		x
Hydroptilidae	Oxyethira	macrosterna		x								x
Hydroptilidae	Oxyethira	maranhensis										x
Hydroptilidae	Oxyethira	merga		x	x
Hydroptilidae	Oxyethira	parce								x
Hydroptilidae	Oxyethira	peruviana		x
Hydroptilidae	Oxyethira	picita		x
Hydroptilidae	Oxyethira	presilla		x
Hydroptilidae	Oxyethira	quadrilobata									x
Hydroptilidae	Oxyethira	rafaeli			x					x
Hydroptilidae	Oxyethira	retrosa			x	x
Hydroptilidae	Oxyethira	santiagensis
Hydroptilidae	Oxyethira	septentrionalis								x
Hydroptilidae	Oxyethira	singularis									x
Hydroptilidae	Oxyethira	sinistra		x
Hydroptilidae	Oxyethira	spirogyrae											x
Hydroptilidae	Oxyethira	spissa		x
Hydroptilidae	Oxyethira	tica	x	x	x					x				x
Hydroptilidae	Oxyethira	una			x
Hydroptilidae	Oxyethira	zilaba							x				x
Hydroptilidae	Peltopsyche	antennata	x										x
Hydroptilidae	Peltopsyche	sieboldii					x
Hydroptilidae	Peltopsyche	squamosa	x										x
Hydroptilidae	Peltopsyche	vegosa							x		x
Hydroptilidae	Rhyacopsyche	angra	x
Hydroptilidae	Rhyacopsyche	bulbosa	x						x
Hydroptilidae	Rhyacopsyche	diacantha										x
Hydroptilidae	Rhyacopsyche	dikrosa	x						x		x
Hydroptilidae	Rhyacopsyche	hagenii	x				x		x
Hydroptilidae	Tricholeiochiton	neotropicalis		x
Hydroptilidae	Tupiniquintrichia	maclachlani					x		x
Hydroptilidae	Tupiniquintrichia	procera	x						x
Leptoceridae	Achoropsyche	duodecimpunctata	x	x	x				x			x		x
Leptoceridae	Amazonatolica	hamadae		x
Leptoceridae	Atanatolica	bonita			x
Leptoceridae	Atanatolica	brasiliana	x
Leptoceridae	Atanatolica	flinti	x
Leptoceridae	Atanatolica	nordestina								x
Leptoceridae	Grumichella	aequiunguis	x				x
Leptoceridae	Grumichella	boraceia	x								x
Leptoceridae	Grumichella	jureia	x
Leptoceridae	Grumichella	leccii	x
Leptoceridae	Grumichella	muelleri					x
Leptoceridae	Grumichella	paprockii	x
Leptoceridae	Grumichella	parati	x						x
Leptoceridae	Grumichella	rostrata	x		x		x		x		x
Leptoceridae	Nectopsyche	acutiloba	x						x
Leptoceridae	Nectopsyche	adusta	x
Leptoceridae	Nectopsyche	aureovittata	x						x		x
Leptoceridae	Nectopsyche	bella											x
Leptoceridae	Nectopsyche	bruchi	x						x
Leptoceridae	Nectopsyche	brunneofascia	x						x		x		x
Leptoceridae	Nectopsyche	diminuta		x
Leptoceridae	Nectopsyche	flavofasciata							x				x
Leptoceridae	Nectopsyche	fuscomaculata	x		x	x			x
Leptoceridae	Nectopsyche	gemma					x		x
Leptoceridae	Nectopsyche	gemmoides	x						x		x
Leptoceridae	Nectopsyche	jenseni		x
Leptoceridae	Nectopsyche	maculipennis							x		x
Leptoceridae	Nectopsyche	modesta											x
Leptoceridae	Nectopsyche	muelleri											x
Leptoceridae	Nectopsyche	muhni	x	x					x		x			x
Leptoceridae	Nectopsyche	multilineata		x
Leptoceridae	Nectopsyche	navasi											x
Leptoceridae	Nectopsyche	nigricapilla										x
Leptoceridae	Nectopsyche	ortizi	x	x					x		x
Leptoceridae	Nectopsyche	pantosticta	x				x		x		x		x
Leptoceridae	Nectopsyche	punctata	x	x					x		x			x
Leptoceridae	Nectopsyche	quatourguttata										x		x
Leptoceridae	Nectopsyche	separata	x						x				x
Leptoceridae	Nectopsyche	splendida		x					x	x	x			x
Leptoceridae	Neoathripsodes	anomalus	x						x
Leptoceridae	Neoathripsodes	holzenthali			x
Leptoceridae	Notalina	brasiliana	x						x		x
Leptoceridae	Notalina	cipo			x				x		x
Leptoceridae	Notalina	franciscana							x		x
Leptoceridae	Notalina	froehlichi	x
Leptoceridae	Notalina	goianensis										x
Leptoceridae	Notalina	hamiltoni	x						x
Leptoceridae	Notalina	jordanensis	x						x
Leptoceridae	Notalina	morsei	x		x				x
Leptoceridae	Notalina	paulista	x								x
Leptoceridae	Oecetis	acanthostema			x
Leptoceridae	Oecetis	acuticlasper	x						x
Leptoceridae	Oecetis	amazonica		x				x	x		x
Leptoceridae	Oecetis	angelae						x
Leptoceridae	Oecetis	blahniki		x
Leptoceridae	Oecetis	calori	x
Leptoceridae	Oecetis	carinata							x
Leptoceridae	Oecetis	cassicoleata									x
Leptoceridae	Oecetis	catagua							x		x
Leptoceridae	Oecetis	clavicornia			x
Leptoceridae	Oecetis	connata	x	x	x					x	x	x
Leptoceridae	Oecetis	danielae		x
Leptoceridae	Oecetis	doesburgi		x
Leptoceridae	Oecetis	dominguezi		x
Leptoceridae	Oecetis	excisa	x	x		x		x			x	x		x
Leptoceridae	Oecetis	fibra	x				x		x	x	x
Leptoceridae	Oecetis	flinti										x
Leptoceridae	Oecetis	froehlichi			x
Leptoceridae	Oecetis	furcata			x
Leptoceridae	Oecetis	gibbosa		x
Leptoceridae	Oecetis	iara							x
Leptoceridae	Oecetis	iguazu	x		x		x		x		x
Leptoceridae	Oecetis	inconspicua		x	x	x			x	x	x
Leptoceridae	Oecetis	knutsoni		x					x
Leptoceridae	Oecetis	machaera		x
Leptoceridae	Oecetis	martinae			x				x
Leptoceridae	Oecetis	paranensis			x			x			x
Leptoceridae	Oecetis	pertica		x
Leptoceridae	Oecetis	punctipennis	x	x	x	x			x					x
Leptoceridae	Oecetis	rafaeli		x
Leptoceridae	Triplectides	cipo							x		x	x
Leptoceridae	Triplectides	egleri		x
Leptoceridae	Triplectides	gracilis	x		x		x		x		x		x
Leptoceridae	Triplectides	itatiaia	x
Leptoceridae	Triplectides	maranhensis												x
Leptoceridae	Triplectides	misionensis	x						x
Leptoceridae	Triplectides	neotropicus	x						x		x
Leptoceridae	Triplectides	ultimus	x						x
Limnephilidae	Antarctoecia	brasiliensis							x
Odontoceridae	Anastomoneura	guahybae	x
Odontoceridae	Barypenthus	concolor	x		x						x
Odontoceridae	Marilia	aiuruoca	x
Odontoceridae	Marilia	alata		x							x
Odontoceridae	Marilia	albicornis
Odontoceridae	Marilia	caramuru										x
Odontoceridae	Marilia	elongata
Odontoceridae	Marilia	fasciculata		x							x
Odontoceridae	Marilia	flexuosa								x			x
Odontoceridae	Marilia	guaira		x					x					x
Odontoceridae	Marilia	huamantincoae	x
Odontoceridae	Marilia	infundibulum											x
Odontoceridae	Marilia	lateralis						x
Odontoceridae	Marilia	mahedae		x
Odontoceridae	Marilia	major	x										x
Odontoceridae	Marilia	minor	x
Odontoceridae	Marilia	paraguassu										x
Odontoceridae	Marilia	sioli		x
Odontoceridae	Marilia	truncata
Philopotamidae	Alterosa	affinis	x
Philopotamidae	Alterosa	amadoi			x
Philopotamidae	Alterosa	bandeira	x
Philopotamidae	Alterosa	beckeri	x
Philopotamidae	Alterosa	bilanceolata					x
Philopotamidae	Alterosa	bocainae	x
Philopotamidae	Alterosa	boraceiae							x
Philopotamidae	Alterosa	caissara	x
Philopotamidae	Alterosa	caparaonensis	x
Philopotamidae	Alterosa	capixaba	x
Philopotamidae	Alterosa	castroalvesi			x
Philopotamidae	Alterosa	catarinae					x
Philopotamidae	Alterosa	caymmii			x
Philopotamidae	Alterosa	escova	x
Philopotamidae	Alterosa	falcata	x
Philopotamidae	Alterosa	fimbriata	x
Philopotamidae	Alterosa	flinti	x
Philopotamidae	Alterosa	fluminensis	x
Philopotamidae	Alterosa	graciosa					x
Philopotamidae	Alterosa	guapimirim	x
Philopotamidae	Alterosa	holzenthali					x
Philopotamidae	Alterosa	inappendiculata					x
Philopotamidae	Alterosa	intervales	x
Philopotamidae	Alterosa	itatiaiae	x
Philopotamidae	Alterosa	jordanensis	x
Philopotamidae	Alterosa	marinonii	x						x
Philopotamidae	Alterosa	morato					x
Philopotamidae	Alterosa	nessimiani	x
Philopotamidae	Alterosa	orgaosensis	x
Philopotamidae	Alterosa	paprockii							x
Philopotamidae	Alterosa	paranaensis							x
Philopotamidae	Alterosa	polyacinata	x
Philopotamidae	Alterosa	ruschii	x
Philopotamidae	Alterosa	sanctaeteresae	x
Philopotamidae	Alterosa	sanctipauli							x
Philopotamidae	Alterosa	schadrackorum					x
Philopotamidae	Alterosa	spiesae	x
Philopotamidae	Alterosa	tripuiensis							x
Philopotamidae	Alterosa	truncata	x						x
Philopotamidae	Chimarra	adamsae		x
Philopotamidae	Chimarra	akantha		x
Philopotamidae	Chimarra	anticheira			x
Philopotamidae	Chimarra	aurivittata		x
Philopotamidae	Chimarra	beckeri	x						x
Philopotamidae	Chimarra	bidens												x
Philopotamidae	Chimarra	boraceia	x						x
Philopotamidae	Chimarra	brasiliana					x		x
Philopotamidae	Chimarra	burmeisteri	x
Philopotamidae	Chimarra	calori							x	x	x
Philopotamidae	Chimarra	camella	x						x		x
Philopotamidae	Chimarra	camposae							x
Philopotamidae	Chimarra	camura	x
Philopotamidae	Chimarra	centrispina									x
Philopotamidae	Chimarra	chela		x
Philopotamidae	Chimarra	cipoensis									x
Philopotamidae	Chimarra	conica	x		x		x	x	x	x	x	x
Philopotamidae	Chimarra	cultellata	x	x				x	x	x		x	x
Philopotamidae	Chimarra	curvipenis									x
Philopotamidae	Chimarra	diaksis		x
Philopotamidae	Chimarra	donamariae										x
Philopotamidae	Chimarra	fittkaui		x
Philopotamidae	Chimarra	froehlichi	x						x
Philopotamidae	Chimarra	gondela		x
Philopotamidae	Chimarra	guyanensis		x
Philopotamidae	Chimarra	heligma									x
Philopotamidae	Chimarra	heppneri		x										x
Philopotamidae	Chimarra	hyoeides	x	x		x			x		x		x
Philopotamidae	Chimarra	jugescens		x										x
Philopotamidae	Chimarra	kontilos	x		x
Philopotamidae	Chimarra	latiforceps	x						x
Philopotamidae	Chimarra	machadoi										x
Philopotamidae	Chimarra	majuscula	x
Philopotamidae	Chimarra	medioloba		x
Philopotamidae	Chimarra	mesodonta			x
Philopotamidae	Chimarra	morio	x		x		x		x
Philopotamidae	Chimarra	odonta	x		x				x
Philopotamidae	Chimarra	parana	x			x			x		x	x	x
Philopotamidae	Chimarra	paucispina		x
Philopotamidae	Chimarra	petersorum							x
Philopotamidae	Chimarra	petricola	x
Philopotamidae	Chimarra	plaumanni	x										x
Philopotamidae	Chimarra	quaternaria		x
Philopotamidae	Chimarra	scopuloides		x				x				x	x
Philopotamidae	Chimarra	simpliciforma		x
Philopotamidae	Chimarra	singularis		x
Philopotamidae	Chimarra	teresae	x
Philopotamidae	Chimarra	tortuosa		x
Philopotamidae	Chimarra	tucuna		x
Philopotamidae	Chimarra	uara		x		x		x			x	x
Philopotamidae	Chimarra	usitatissima		x				x			x			x
Philopotamidae	Chimarra	xingu										x
Philopotamidae	Chimarra	ypsilon	x						x		x		x
Philopotamidae	Wormaldia	planae		x
Polycentropodidae	Cernotina	abreviatta		x
Polycentropodidae	Cernotina	acalyptra		x
Polycentropodidae	Cernotina	anhanguera										x
Polycentropodidae	Cernotina	antonina	x			x	x
Polycentropodidae	Cernotina	aruma		x
Polycentropodidae	Cernotina	attenuata		x
Polycentropodidae	Cernotina	bibrachiata		x
Polycentropodidae	Cernotina	bispicata										x
Polycentropodidae	Cernotina	cacha		x
Polycentropodidae	Cernotina	cingulata		x
Polycentropodidae	Cernotina	compressa		x
Polycentropodidae	Cernotina	cygnea		x
Polycentropodidae	Cernotina	cystophora		x
Polycentropodidae	Cernotina	declinata		x
Polycentropodidae	Cernotina	decumbens		x
Polycentropodidae	Cernotina	ecotura		x
Polycentropodidae	Cernotina	encrypta		x
Polycentropodidae	Cernotina	falcata										x
Polycentropodidae	Cernotina	filiformis		x
Polycentropodidae	Cernotina	flexuosa		x
Polycentropodidae	Cernotina	lanceolata			x
Polycentropodidae	Cernotina	lazzarii					x		x
Polycentropodidae	Cernotina	lobisomem		x
Polycentropodidae	Cernotina	longispina			x
Polycentropodidae	Cernotina	mandeba		x
Polycentropodidae	Cernotina	obliqua		x
Polycentropodidae	Cernotina	odonta		x
Polycentropodidae	Cernotina	perpendicularis		x					x				x
Polycentropodidae	Cernotina	pesae		x
Polycentropodidae	Cernotina	puri			x
Polycentropodidae	Cernotina	sexpinosa											x
Polycentropodidae	Cernotina	sinuosa			x
Polycentropodidae	Cernotina	spinigera		x								x	x
Polycentropodidae	Cernotina	spinosior		x
Polycentropodidae	Cernotina	subapicalis		x
Polycentropodidae	Cernotina	trispina		x
Polycentropodidae	Cernotina	uara		x
Polycentropodidae	Cernotina	unguiculata		x
Polycentropodidae	Cernotina	verticalis		x
Polycentropodidae	Cyrnellus	arotron		x				x						x
Polycentropodidae	Cyrnellus	bifidus		x				x
Polycentropodidae	Cyrnellus	collaris		x									x
Polycentropodidae	Cyrnellus	fraternus	x	x	x			x	x	x	x	x	x	x
Polycentropodidae	Cyrnellus	mammillatus		x	x	x			x		x			x
Polycentropodidae	Cyrnellus	rianus												x
Polycentropodidae	Cyrnellus	risi		x	x
Polycentropodidae	Cyrnellus	ulmeri		x									x
Polycentropodidae	Nyctiophylax	neotropicalis		x	x	x
Polycentropodidae	Polycentropus	acinaciformis									x
Polycentropodidae	Polycentropus	amphirhamphus			x								x
Polycentropodidae	Polycentropus	ancistrus	x
Polycentropodidae	Polycentropus	boraceia	x
Polycentropodidae	Polycentropus	brevicornutus			x
Polycentropodidae	Polycentropus	caaete	x				x		x
Polycentropodidae	Polycentropus	cachoeira											x
Polycentropodidae	Polycentropus	carioca			x
Polycentropodidae	Polycentropus	carolae			x
Polycentropodidae	Polycentropus	cheliceratus			x
Polycentropodidae	Polycentropus	cipoensis							x		x
Polycentropodidae	Polycentropus	fluminensis			x
Polycentropodidae	Polycentropus	froehlichi	x				x						x
Polycentropodidae	Polycentropus	galharda			x
Polycentropodidae	Polycentropus	graciosa					x		x
Polycentropodidae	Polycentropus	inusitatus			x
Polycentropodidae	Polycentropus	itatiaia			x
Polycentropodidae	Polycentropus	minero			x						x
Polycentropodidae	Polycentropus	paprockii			x						x
Polycentropodidae	Polycentropus	rosalysae			x
Polycentropodidae	Polycentropus	santateresae			x
Polycentropodidae	Polycentropus	soniae	x				x		x
Polycentropodidae	Polycentropus	tripui			x						x
Polycentropodidae	Polycentropus	urubici	x		x		x		x
Polycentropodidae	Polycentropus	verruculus			x				x
Polycentropodidae	Polycentropus	virginae			x						x
Polycentropodidae	Polyplectropus	alatespinus			x
Polycentropodidae	Polyplectropus	alleni
Polycentropodidae	Polyplectropus	anchorus			x
Polycentropodidae	Polyplectropus	annulicornis	x		x		x		x				x
Polycentropodidae	Polyplectropus	auriplicatus			x
Polycentropodidae	Polyplectropus	banksianus		x
Polycentropodidae	Polyplectropus	brachyscolus		x
Polycentropodidae	Polyplectropus	brasilensis			x
Polycentropodidae	Polyplectropus	canastra							x		x
Polycentropodidae	Polyplectropus	dubitatus							x		x		x
Polycentropodidae	Polyplectropus	elongatus			x				x				x
Polycentropodidae	Polyplectropus	flavicornis			x						x
Polycentropodidae	Polyplectropus	fuscatus											x
Polycentropodidae	Polyplectropus	gaesum			x						x
Polycentropodidae	Polyplectropus	hamulus												x
Polycentropodidae	Polyplectropus	hollyae			x				x
Polycentropodidae	Polyplectropus	hystricosus			x
Polycentropodidae	Polyplectropus	inarmatus		x										x
Polycentropodidae	Polyplectropus	juliae			x						x
Polycentropodidae	Polyplectropus	matatlanticus			x
Polycentropodidae	Polyplectropus	minesium			x
Polycentropodidae	Polyplectropus	novafriburgensis			x
Polycentropodidae	Polyplectropus	petrae			x
Polycentropodidae	Polyplectropus	pratherae			x
Polycentropodidae	Polyplectropus	profaupar	x		x		x
Polycentropodidae	Polyplectropus	rodmani			x
Polycentropodidae	Polyplectropus	rondoniensis		x
Polycentropodidae	Polyplectropus	spiculifer		x
Polycentropodidae	Polyplectropus	tepequemensis		x
Polycentropodidae	Polyplectropus	tragularius			x				x		x
Polycentropodidae	Polyplectropus	ulmeriana											x
Sericostomatidae	Grumicha	grumicha	x						x
Sericostomatidae	Notidobiella	amazoniana		x
Sericostomatidae	Notidobiella	brasiliana							x
Xiphocentronidae	Machairocentron	falciforme		x
Xiphocentronidae	Xiphocentron	acqualume							x
Xiphocentronidae	Xiphocentron	copacabana	x
Xiphocentronidae	Xiphocentron	ilionea			x
Xiphocentronidae	Xiphocentron	jaguare							x		x
Xiphocentronidae	Xiphocentron	kamakan			x
Xiphocentronidae	Xiphocentron	maiteae			x
Xiphocentronidae	Xiphocentron	maracanan	x
Xiphocentronidae	Xiphocentron	redentor	x
Xiphocentronidae	Xiphocentron	saltuum					x
Xiphocentronidae	Xiphocentron	sclerothrix		x
Xiphocentronidae	Xiphocentron	steffeni	x						x
Xiphocentronidae	Xiphocentron	tijuca	x
incertae sedis	Eutonella	peltopsychodes

## Sheet: states
Supplementary 1. List of Trichoptera species recorded to Brazil until August 2019, indicating endemic species to the country and respective distributional record through biomes, hydrographic regions, and Brazilian states. These data were available at Santos et al. 2019 http://fauna.jbrj.gov.br/fauna/faunadobrasil/278 [accessed on 02 September 2019]
Family	Genus	Species	Acre	Amazonas	Amapa	Para	Rondonia	Roraima	Tocantins	Alagoas	Bahia	Ceara	Maranhao	Paraiba	Pernambuco	Piaui	Rio Grande do Norte	Sergipe	Goias	Mato Grosso	Mato Grosso do Sul	Espirito Santo	Minas Gerais	Rio de Janeiro	Sao Paulo	Parana	Rio Grande do Sul	Santa Catarina	Federal District
Anomalopsychidae	Contulma	fluminensis																						x
Anomalopsychidae	Contulma	meloi																							x						Santos APM, Dumas LL, Henriques-Oliveira A, Souza WRM, Camargos LM, Calor AR, Pes AMO (2020)
Anomalopsychidae	Contulma	sana																						x
Anomalopsychidae	Contulma	tijuca																						x
Anomalopsychidae	Contulma	tripui																					x
Anomalopsychidae	Contulma	vascaina																						x
Atriplectididae	Neoatriplectides	desiderata																					x	x	x
Calamoceratidae	Phylloicus	abdominalis									x	x											x	x	x	x		x
Calamoceratidae	Phylloicus	amazonas		x
Calamoceratidae	Phylloicus	angustior																	x				x		x	x	x	x
Calamoceratidae	Phylloicus	auratus		x
Calamoceratidae	Phylloicus	bertioga																							x
Calamoceratidae	Phylloicus	bidigitatus									x	x											x	x	x
Calamoceratidae	Phylloicus	brevior				x	x	x					x
Calamoceratidae	Phylloicus	bromeliarum																							x			x
Calamoceratidae	Phylloicus	camargoi																							x
Calamoceratidae	Phylloicus	dumasi		x
Calamoceratidae	Phylloicus	elektoros		x
Calamoceratidae	Phylloicus	fenestratus		x			x	x					x	x												x
Calamoceratidae	Phylloicus	flinti					x
Calamoceratidae	Phylloicus	major																						x	x			x
Calamoceratidae	Phylloicus	medius																										x
Calamoceratidae	Phylloicus	mirabilis																						x
Calamoceratidae	Phylloicus	monneorum									x													x
Calamoceratidae	Phylloicus	obliquus									x	x											x	x				x
Calamoceratidae	Phylloicus	paprockii									x												x
Calamoceratidae	Phylloicus	pirapo										x
Calamoceratidae	Phylloicus	plaumanni																										x
Calamoceratidae	Phylloicus	quadridigitatus																							x
Calamoceratidae	Phylloicus	sallesi																				x
Calamoceratidae	Phylloicus	tricalcaratus									x
Calamoceratidae	Phylloicus	yolandae																								x
Ecnomidae	Austrotinodes	abrachium																					x
Ecnomidae	Austrotinodes	absaberi																					x
Ecnomidae	Austrotinodes	adolfolutzi																					x
Ecnomidae	Austrotinodes	amazonensis		x																			x
Ecnomidae	Austrotinodes	ariasi		x		x
Ecnomidae	Austrotinodes	belchioris									x												x
Ecnomidae	Austrotinodes	berthalitzae																			x
Ecnomidae	Austrotinodes	bracteatus																							x
Ecnomidae	Austrotinodes	carioca																						x
Ecnomidae	Austrotinodes	chagasi																				x		x	x	x		x
Ecnomidae	Austrotinodes	costalimai																							x
Ecnomidae	Austrotinodes	cruzi																				x
Ecnomidae	Austrotinodes	donagrazielae																							x
Ecnomidae	Austrotinodes	gusmaoi																							x
Ecnomidae	Austrotinodes	lattesi																							x			x
Ecnomidae	Austrotinodes	lenti						x															x
Ecnomidae	Austrotinodes	longispinum																				x		x	x
Ecnomidae	Austrotinodes	neblinensis						x
Ecnomidae	Austrotinodes	paraguayenis				x						x				x							x
Ecnomidae	Austrotinodes	prolixus																					x	x	x
Ecnomidae	Austrotinodes	quintarellii																						x
Ecnomidae	Austrotinodes	santosdumonti																						x	x	x
Ecnomidae	Austrotinodes	taquaralis									x											x	x	x
Ecnomidae	Austrotinodes	tepui						x
Ecnomidae	Austrotinodes	uruguayensis																								x
Ecnomidae	Austrotinodes	vanzolinii																							x
Ecnomidae	Austrotinodes	vitalbrazili																					x
Glossosomatidae	Canoptila	bifida																										x
Glossosomatidae	Canoptila	williami																							x	x
Glossosomatidae	Itauara	alexanderi																						x
Glossosomatidae	Itauara	amazonica		x
Glossosomatidae	Itauara	blahniki																							x
Glossosomatidae	Itauara	brasiliana																										x
Glossosomatidae	Itauara	charlotta																					x
Glossosomatidae	Itauara	emilia																							x
Glossosomatidae	Itauara	flinti																							x
Glossosomatidae	Itauara	jamesii																					x
Glossosomatidae	Itauara	julia																						x
Glossosomatidae	Itauara	lucinda																					x
Glossosomatidae	Itauara	plaumanii																										x
Glossosomatidae	Itauara	rodmani																					x
Glossosomatidae	Itauara	simplex																							x
Glossosomatidae	Itauara	stella																							x
Glossosomatidae	Itauara	tusci																						x
Glossosomatidae	Mortoniella	acauda																										x
Glossosomatidae	Mortoniella	agosta																						x
Glossosomatidae	Mortoniella	albolineata																							x			x
Glossosomatidae	Mortoniella	alicula																						x
Glossosomatidae	Mortoniella	asymmetris													x
Glossosomatidae	Mortoniella	bocaina																							x
Glossosomatidae	Mortoniella	catarinensis																										x
Glossosomatidae	Mortoniella	crescentis																						x
Glossosomatidae	Mortoniella	dolonis																					x		x
Glossosomatidae	Mortoniella	froehlichi																						x	x
Glossosomatidae	Mortoniella	guahybae																							x
Glossosomatidae	Mortoniella	hystricosa																										x
Glossosomatidae	Mortoniella	intervales																							x
Glossosomatidae	Mortoniella	latispina																							x
Glossosomatidae	Mortoniella	longispina																										x
Glossosomatidae	Mortoniella	meloi																							x
Glossosomatidae	Mortoniella	ormina																										x
Glossosomatidae	Mortoniella	parauna																					x
Glossosomatidae	Mortoniella	paraunota																										x
Glossosomatidae	Mortoniella	pumila																						x
Glossosomatidae	Mortoniella	pusilla																					x
Glossosomatidae	Mortoniella	teutona																						x	x	x		x
Glossosomatidae	Mortoniella	tripuiensis																					x
Glossosomatidae	Mortoniella	truncata																					x
Glossosomatidae	Mortoniella	unota																										x
Glossosomatidae	Mortoniella	uruguaiensis																										x
Glossosomatidae	Protoptila	condylifera		x
Glossosomatidae	Protoptila	cora																					x
Glossosomatidae	Protoptila	distischa		x		x
Glossosomatidae	Protoptila	dubitans																										x
Glossosomatidae	Protoptila	ensifera		x				x
Glossosomatidae	Protoptila	flexispina		x
Glossosomatidae	Protoptila	longispinata		x		x
Glossosomatidae	Protoptila	macilenta				x
Glossosomatidae	Protoptila	mara		x
Glossosomatidae	Protoptila	simplex		x		x
Glossosomatidae	Protoptila	ternatia		x
Glossosomatidae	Protoptila	tetravittata		x
Glossosomatidae	Protoptila	trispicata		x
Glossosomatidae	Tolhuaca	brasiliensis																							x
Helicopsychidae	Helicopsyche	amazona		x
Helicopsychidae	Helicopsyche	amica		x		x
Helicopsychidae	Helicopsyche	angeloi																					x	x	x
Helicopsychidae	Helicopsyche	bedengo																						x
Helicopsychidae	Helicopsyche	blahniki		x
Helicopsychidae	Helicopsyche	brazilia																					x
Helicopsychidae	Helicopsyche	braziliensis
Helicopsychidae	Helicopsyche	carajas				x
Helicopsychidae	Helicopsyche	catoles									x
Helicopsychidae	Helicopsyche	cipoensis																					x
Helicopsychidae	Helicopsyche	clara													x								x					x
Helicopsychidae	Helicopsyche	daome																						x
Helicopsychidae	Helicopsyche	dinoprata																						x
Helicopsychidae	Helicopsyche	flinti																										x
Helicopsychidae	Helicopsyche	guara																					x					x
Helicopsychidae	Helicopsyche	guariru									x												x
Helicopsychidae	Helicopsyche	helicoidella									x
Helicopsychidae	Helicopsyche	inflata				x
Helicopsychidae	Helicopsyche	lazzariae																								x
Helicopsychidae	Helicopsyche	lobata																					x					x
Helicopsychidae	Helicopsyche	luziae																						x
Helicopsychidae	Helicopsyche	monda										x											x		x	x		x
Helicopsychidae	Helicopsyche	muelleri																										x
Helicopsychidae	Helicopsyche	opalescens						x					x											x	x
Helicopsychidae	Helicopsyche	pandeirosa																					x
Helicopsychidae	Helicopsyche	paprockii											x										x
Helicopsychidae	Helicopsyche	petri																						x
Helicopsychidae	Helicopsyche	planorboides																				x	x	x
Helicopsychidae	Helicopsyche	shaamanensu																						x
Helicopsychidae	Helicopsyche	succinta									x
Helicopsychidae	Helicopsyche	timbira																						x	x
Helicopsychidae	Helicopsyche	valligera																										x
Helicopsychidae	Helicopsyche	vergelana					x	x				x	x		x	x
Helicopsychidae	Helicopsyche	xinguensis				x
Hydrobiosidae	Atopsyche	acahuana																				x	x	x
Hydrobiosidae	Atopsyche	antisuya									x				x								x
Hydrobiosidae	Atopsyche	apurimac																						x			x
Hydrobiosidae	Atopsyche	blahniki																						x
Hydrobiosidae	Atopsyche	chirihuana																					x
Hydrobiosidae	Atopsyche	diamantina									x												x
Hydrobiosidae	Atopsyche	erigia																					x		x
Hydrobiosidae	Atopsyche	galharda																							x
Hydrobiosidae	Atopsyche	hamata						x
Hydrobiosidae	Atopsyche	hatunpuna																					x		x
Hydrobiosidae	Atopsyche	huacachaca																						x
Hydrobiosidae	Atopsyche	huamachucu																						x
Hydrobiosidae	Atopsyche	huanapu																						x	x
Hydrobiosidae	Atopsyche	huarcu																					x	x	x
Hydrobiosidae	Atopsyche	japi																							x
Hydrobiosidae	Atopsyche	kamakan									x
Hydrobiosidae	Atopsyche	longipennis																										x
Hydrobiosidae	Atopsyche	muelleri																	x
Hydrobiosidae	Atopsyche	parauna																					x
Hydrobiosidae	Atopsyche	plancki																						x	x			x
Hydrobiosidae	Atopsyche	rinconi									x												x
Hydrobiosidae	Atopsyche	sanctipauli																					x	x	x		x	x
Hydrobiosidae	Atopsyche	serica																									x	x
Hydrobiosidae	Atopsyche	siolii		x
Hydrobiosidae	Atopsyche	urumarca																					x		x
Hydrobiosidae	Atopsyche	usingeri																						x	x
Hydrobiosidae	Atopsyche	zernyi																				x	x	x	x		x	x
Hydropsychidae	Blepharopus	diaphanus	x	x		x		x					x		x					x		x	x	x	x			x
Hydropsychidae	Centromacronema	auripenne						x															x	x	x			x
Hydropsychidae	Centromacronema	obscurum																				x	x		x			x
Hydropsychidae	Centromacronema	pioneira									x
Hydropsychidae	Centromacronema	poyanawa	x
Hydropsychidae	Leptonema	agraphum																						x
Hydropsychidae	Leptonema	amazonense		x				x												x	x
Hydropsychidae	Leptonema	amplifurcatum																						x
Hydropsychidae	Leptonema	aspersum		x		x					x									x					x
Hydropsychidae	Leptonema	aterrimum				x							x
Hydropsychidae	Leptonema	bifurcatodes																						x
Hydropsychidae	Leptonema	bifurcatum																					x	x
Hydropsychidae	Leptonema	boraceia																						x	x
Hydropsychidae	Leptonema	columbianum		x		x	x				x		x						x		x		x		x				x
Hydropsychidae	Leptonema	crassum		x			x												x	x		x	x		x
Hydropsychidae	Leptonema	eugnathum																								x		x
Hydropsychidae	Leptonema	ferelunatum																						x
Hydropsychidae	Leptonema	lacuniferum		x
Hydropsychidae	Leptonema	lineaticorne																					x
Hydropsychidae	Leptonema	lunatum																										x
Hydropsychidae	Leptonema	macacu																						x
Hydropsychidae	Leptonema	maculatum		x		x							x							x
Hydropsychidae	Leptonema	pallidum									x		x						x			x	x	x	x				x
Hydropsychidae	Leptonema	ramosum						x
Hydropsychidae	Leptonema	rostratum		x		x		x												x
Hydropsychidae	Leptonema	sancticaroli		x				x					x
Hydropsychidae	Leptonema	santosi																						x
Hydropsychidae	Leptonema	serranum																							x
Hydropsychidae	Leptonema	serratum																						x
Hydropsychidae	Leptonema	sparsum		x		x		x					x						x	x			x	x	x	x		x	x
Hydropsychidae	Leptonema	speciosum																						x
Hydropsychidae	Leptonema	spinulum		x		x		x				x								x
Hydropsychidae	Leptonema	stigmaticum																						x
Hydropsychidae	Leptonema	tholloni																						x
Hydropsychidae	Leptonema	tridens																					x	x	x	x
Hydropsychidae	Leptonema	trispicatum																							x
Hydropsychidae	Leptonema	viridianum				x					x	x	x			x			x			x	x	x					x
Hydropsychidae	Macronema	amazonense		x
Hydropsychidae	Macronema	argentilineatum		x		x							x
Hydropsychidae	Macronema	bicolor																			x	x						x
Hydropsychidae	Macronema	burmeisteri		x
Hydropsychidae	Macronema	exophtalmum		x
Hydropsychidae	Macronema	fragile		x				x			x
Hydropsychidae	Macronema	fulvum																						x	x
Hydropsychidae	Macronema	hageni		x		x		x					x							x			x
Hydropsychidae	Macronema	immaculatum																							x	x
Hydropsychidae	Macronema	lachlani		x
Hydropsychidae	Macronema	lineatum									x
Hydropsychidae	Macronema	muelleri		x				x
Hydropsychidae	Macronema	paliferum											x
Hydropsychidae	Macronema	partitum									x												x	x		x		x
Hydropsychidae	Macronema	parvum		x
Hydropsychidae	Macronema	pennyi		x
Hydropsychidae	Macronema	percitans		x		x							x							x
Hydropsychidae	Macronema	pertyi				x							x							x
Hydropsychidae	Macronema	rubiginosum
Hydropsychidae	Macrostemum	araca		x
Hydropsychidae	Macrostemum	arcuatum		x		x														x
Hydropsychidae	Macrostemum	brasiliense									x											x	x	x	x
Hydropsychidae	Macrostemum	braueri		x
Hydropsychidae	Macrostemum	bravoi									x		x							x
Hydropsychidae	Macrostemum	digramma																				x	x	x	x
Hydropsychidae	Macrostemum	erichsoni	x	x		x		x			x											x
Hydropsychidae	Macrostemum	hyalinum	x			x					x	x	x	x	x					x		x		x	x	x
Hydropsychidae	Macrostemum	negrense		x		x														x
Hydropsychidae	Macrostemum	nigrum									x
Hydropsychidae	Macrostemum	par																							x
Hydropsychidae	Macrostemum	ramosum																						x
Hydropsychidae	Macrostemum	santaeritae	x	x		x					x									x
Hydropsychidae	Macrostemum	surinamense		x
Hydropsychidae	Macrostemum	trigramma																						x
Hydropsychidae	Macrostemum	triste																						x
Hydropsychidae	Macrostemum	ulmeri	x	x		x	x	x				x	x			x				x			x		x	x
Hydropsychidae	Plectromacronema	comptum		x		x		x
Hydropsychidae	Plectromacronema	solaris																					x
Hydropsychidae	Plectromacronema	subfuscum																										x
Hydropsychidae	Pseudomacronema	vittatum		x		x
Hydropsychidae	Smicridea	abrupta		x				x
Hydropsychidae	Smicridea	aequalis				x						x				x
Hydropsychidae	Smicridea	albosignata									x												x	x	x	x
Hydropsychidae	Smicridea	appendiculata		x				x					x							x			x
Hydropsychidae	Smicridea	araguaiense																		x
Hydropsychidae	Smicridea	atrobasis																										x
Hydropsychidae	Smicridea	bicornuta																		x
Hydropsychidae	Smicridea	bifasciata																		x
Hydropsychidae	Smicridea	bivittata				x		x				x				x							x		x
Hydropsychidae	Smicridea	brasiliana																										x
Hydropsychidae	Smicridea	caatinga										x				x
Hydropsychidae	Smicridea	caligata		x				x
Hydropsychidae	Smicridea	columbiana		x				x
Hydropsychidae	Smicridea	coronata									x					x				x		x	x		x		x
Hydropsychidae	Smicridea	dentifera																							x
Hydropsychidae	Smicridea	dentiserrata																		x
Hydropsychidae	Smicridea	discalis																					x			x
Hydropsychidae	Smicridea	ephippifer				x							x							x
Hydropsychidae	Smicridea	erecta		x
Hydropsychidae	Smicridea	flinti		x																x
Hydropsychidae	Smicridea	forcipata																										x
Hydropsychidae	Smicridea	franciscana										x											x
Hydropsychidae	Smicridea	froehlichi																	x				x	x
Hydropsychidae	Smicridea	gemina																				x		x
Hydropsychidae	Smicridea	gladiator		x		x
Hydropsychidae	Smicridea	helenae		x				x					x							x
Hydropsychidae	Smicridea	iguazu																				x	x	x		x		x
Hydropsychidae	Smicridea	jundiai									x									x		x	x	x	x	x
Hydropsychidae	Smicridea	mangaratiba																						x
Hydropsychidae	Smicridea	marlieri		x		x		x
Hydropsychidae	Smicridea	marua		x
Hydropsychidae	Smicridea	mesembrina																		x
Hydropsychidae	Smicridea	mirnae																								x
Hydropsychidae	Smicridea	necator																					x
Hydropsychidae	Smicridea	obliqua		x				x					x
Hydropsychidae	Smicridea	palifera						x			x		x		x					x		x		x
Hydropsychidae	Smicridea	palmar											x		x				x	x		x
Hydropsychidae	Smicridea	paranensis										x				x							x	x	x	x
Hydropsychidae	Smicridea	piraya									x											x	x		x	x
Hydropsychidae	Smicridea	pseudolobata		x		x
Hydropsychidae	Smicridea	radula																				x	x	x	x	x
Hydropsychidae	Smicridea	ralphi																				x		x	x	x
Hydropsychidae	Smicridea	reinerti				x
Hydropsychidae	Smicridea	roraimense						x					x		x							x
Hydropsychidae	Smicridea	sattleri																					x		x
Hydropsychidae	Smicridea	scutellaris		x		x		x															x
Hydropsychidae	Smicridea	sepala																					x
Hydropsychidae	Smicridea	sexpinosa		x				x
Hydropsychidae	Smicridea	spinulosa		x		x																			x	x	x	x
Hydropsychidae	Smicridea	truncata		x		x														x				x
Hydropsychidae	Smicridea	unguiculata																	x				x		x	x		x
Hydropsychidae	Smicridea	vermiculata				x																	x		x	x		x
Hydropsychidae	Smicridea	vilela		x		x
Hydropsychidae	Smicridea	voluta		x		x
Hydropsychidae	Smicridea	weidneri																								x		x
Hydropsychidae	Synoestropsis	furcata				x	x	x					x							x
Hydropsychidae	Synoestropsis	grisoli		x		x		x			x									x	x		x				x
Hydropsychidae	Synoestropsis	obliqua																									x	x
Hydropsychidae	Synoestropsis	pedicillata											x		x							x	x		x		x	x
Hydropsychidae	Synoestropsis	punctipennis		x		x																x
Hydropsychidae	Synoestropsis	stictonota																										x
Hydroptilidae	Acostatrichia	brevipenis						x
Hydroptilidae	Acostatrichia	buborektala		x
Hydroptilidae	Acostatrichia	elvesta					x
Hydroptilidae	Acostatrichia	fluminensis																						x
Hydroptilidae	Acostatrichia	ketvilla				x
Hydroptilidae	Acostatrichia	plaumanni																										x
Hydroptilidae	Acostatrichia	simulans																										x
Hydroptilidae	Acostatrichia	tuskera																							x
Hydroptilidae	Alisotrichia	cacaulandia					x
Hydroptilidae	Alisotrichia	holzenthali																					x
Hydroptilidae	Alisotrichia	macae																						x
Hydroptilidae	Alisotrichia	nessimiani																						x
Hydroptilidae	Alisotrichia	ubatuba																							x
Hydroptilidae	Anchitrichia	duplifurcata																					x	x
Hydroptilidae	Ascotrichia	adirecta									x												x
Hydroptilidae	Ascotrichia	frontalis		x																		x		x
Hydroptilidae	Ascotrichia	hystricosa																	x				x
Hydroptilidae	Ascotrichia	simoma																					x		x
Hydroptilidae	Betrichia	bispinosa		x	x	x
Hydroptilidae	Betrichia	kagyla		x
Hydroptilidae	Betrichia	longistyla																										x
Hydroptilidae	Betrichia	nhundiaquara									x					x							x			x
Hydroptilidae	Betrichia	uruguayensis				x
Hydroptilidae	Betrichia	varratlana					x
Hydroptilidae	Betrichia	zilbra									x							x										x
Hydroptilidae	Bredinia	espinosa					x													x
Hydroptilidae	Byrsopteryx	abrelata																						x	x	x
Hydroptilidae	Byrsopteryx	carioca																						x
Hydroptilidae	Byrsopteryx	espinhosa																						x
Hydroptilidae	Costatrichia	hamulifera													x									x	x			x
Hydroptilidae	Costatrichia	ipixuna		x
Hydroptilidae	Costatrichia	nelsonferreirai				x
Hydroptilidae	Costatrichia	noite		x
Hydroptilidae	Dicaminus	ladislavii																										x
Hydroptilidae	Flintiella	andreae													x
Hydroptilidae	Flintiella	astilla									x									x					x	x
Hydroptilidae	Flintiella	boraceia																							x
Hydroptilidae	Flintiella	carajas				x
Hydroptilidae	Flintiella	harrisi														x
Hydroptilidae	Flintiella	manauara		x
Hydroptilidae	Flintiella	pallida											x
Hydroptilidae	Flintiella	pizotensis		x
Hydroptilidae	Hydroptila	argentinica																						x	x	x
Hydroptilidae	Hydroptila	florestani														x
Hydroptilidae	Hydroptila	marighellai								x		x			x
Hydroptilidae	Hydroptila	producta																						x				x
Hydroptilidae	Hydroptila	zerbinae								x	x				x
Hydroptilidae	Leucotrichia	alibrachia																						x
Hydroptilidae	Leucotrichia	bicornuta																						x
Hydroptilidae	Leucotrichia	brasiliana		x
Hydroptilidae	Metrichia	acuminata								x		x
Hydroptilidae	Metrichia	azul																								x
Hydroptilidae	Metrichia	bonita																			x
Hydroptilidae	Metrichia	bracui																						x
Hydroptilidae	Metrichia	caraca																					x
Hydroptilidae	Metrichia	circuliforme																						x
Hydroptilidae	Metrichia	curta																						x
Hydroptilidae	Metrichia	farofa																					x
Hydroptilidae	Metrichia	forceps																								x
Hydroptilidae	Metrichia	formosinha																			x
Hydroptilidae	Metrichia	goiana																	x
Hydroptilidae	Metrichia	itabaiana																x	x
Hydroptilidae	Metrichia	longissima																						x
Hydroptilidae	Metrichia	peluda																						x
Hydroptilidae	Metrichia	pernambucana													x
Hydroptilidae	Metrichia	rafaeli										x
Hydroptilidae	Metrichia	simples																								x
Hydroptilidae	Metrichia	talhada								x
Hydroptilidae	Metrichia	tere																						x
Hydroptilidae	Metrichia	ubajara										x
Hydroptilidae	Metrichia	vulgaris										x							x				x	x
Hydroptilidae	Neotrichia	abbreviata																										x
Hydroptilidae	Neotrichia	bellinii		x
Hydroptilidae	Neotrichia	browni		x
Hydroptilidae	Neotrichia	colmillosa		x
Hydroptilidae	Neotrichia	didii		x
Hydroptilidae	Neotrichia	djalmasantosi		x
Hydroptilidae	Neotrichia	dubitans																						x				x
Hydroptilidae	Neotrichia	durior																										x
Hydroptilidae	Neotrichia	feolai		x
Hydroptilidae	Neotrichia	filifera													x								x
Hydroptilidae	Neotrichia	garrinchai		x
Hydroptilidae	Neotrichia	gilmari		x
Hydroptilidae	Neotrichia	longissima																										x
Hydroptilidae	Neotrichia	niltonsantosi		x
Hydroptilidae	Neotrichia	noteuna																										x
Hydroptilidae	Neotrichia	novara																										x
Hydroptilidae	Neotrichia	orlandoi		x
Hydroptilidae	Neotrichia	ovona																										x
Hydroptilidae	Neotrichia	pelei		x
Hydroptilidae	Neotrichia	rotundata						x
Hydroptilidae	Neotrichia	sicilicula																										x
Hydroptilidae	Neotrichia	tertia																										x
Hydroptilidae	Neotrichia	teutonia																										x
Hydroptilidae	Neotrichia	vavai		x
Hydroptilidae	Neotrichia	zagalloi		x
Hydroptilidae	Neotrichia	zitoi		x
Hydroptilidae	Nothotrichia	tupi																					x
Hydroptilidae	Ochrotrichia	caatinga										x
Hydroptilidae	Ochrotrichia	concha		x
Hydroptilidae	Ochrotrichia	constricta									x
Hydroptilidae	Ochrotrichia	igrapiuna									x		x
Hydroptilidae	Ochrotrichia	limeirai										x
Hydroptilidae	Ochrotrichia	manuensis									x
Hydroptilidae	Ochrotrichia	nematomorpha																						x
Hydroptilidae	Ochrotrichia	patulosa										x												x
Hydroptilidae	Ochrotrichia	priapo									x
Hydroptilidae	Ochrotrichia	sagitta																						x
Hydroptilidae	Ochrotrichia	taunay																						x
Hydroptilidae	Orinocotrichia	angelus											x
Hydroptilidae	Oxyethira	bettyae													x
Hydroptilidae	Oxyethira	bicornuta		x
Hydroptilidae	Oxyethira	brasiliensis				x
Hydroptilidae	Oxyethira	calori									x
Hydroptilidae	Oxyethira	cascadanta																					x
Hydroptilidae	Oxyethira	circaverna		x							x		x	x
Hydroptilidae	Oxyethira	diplospissa								x
Hydroptilidae	Oxyethira	discaelata		x
Hydroptilidae	Oxyethira	espinada								x													x
Hydroptilidae	Oxyethira	gracilianoi								x	x
Hydroptilidae	Oxyethira	guariba												x
Hydroptilidae	Oxyethira	hyalina																										x
Hydroptilidae	Oxyethira	iannuzzae								x	x
Hydroptilidae	Oxyethira	lagunita																								x
Hydroptilidae	Oxyethira	longipenis		x
Hydroptilidae	Oxyethira	longissima		x
Hydroptilidae	Oxyethira	luanae		x
Hydroptilidae	Oxyethira	macrosterna		x									x
Hydroptilidae	Oxyethira	maranhensis											x
Hydroptilidae	Oxyethira	merga						x			x
Hydroptilidae	Oxyethira	parce										x											x
Hydroptilidae	Oxyethira	peruviana		x
Hydroptilidae	Oxyethira	picita		x
Hydroptilidae	Oxyethira	presilla		x
Hydroptilidae	Oxyethira	quadrilobata																					x
Hydroptilidae	Oxyethira	rafaeli									x					x
Hydroptilidae	Oxyethira	retrosa								x								x
Hydroptilidae	Oxyethira	santiagensis
Hydroptilidae	Oxyethira	septentrionalis														x
Hydroptilidae	Oxyethira	singularis									x
Hydroptilidae	Oxyethira	sinistra		x
Hydroptilidae	Oxyethira	spirogyrae																										x
Hydroptilidae	Oxyethira	spissa		x		x
Hydroptilidae	Oxyethira	tica		x						x	x	x	x	x	x	x		x					x	x
Hydroptilidae	Oxyethira	una									x
Hydroptilidae	Oxyethira	zilaba																					x		x	x		x
Hydroptilidae	Peltopsyche	antennata													x								x	x				x
Hydroptilidae	Peltopsyche	sieboldii																										x
Hydroptilidae	Peltopsyche	squamosa																					x	x				x
Hydroptilidae	Peltopsyche	vegosa									x														x
Hydroptilidae	Rhyacopsyche	angra																						x
Hydroptilidae	Rhyacopsyche	bulbosa																					x	x	x
Hydroptilidae	Rhyacopsyche	diacantha				x
Hydroptilidae	Rhyacopsyche	dikrosa																					x	x	x
Hydroptilidae	Rhyacopsyche	hagenii																						x	x	x		x
Hydroptilidae	Tricholeiochiton	neotropicalis						x
Hydroptilidae	Tupiniquintrichia	maclachlani																								x		x
Hydroptilidae	Tupiniquintrichia	procera																					x	x	x
Leptoceridae	Achoropsyche	duodecimpunctata		x		x	x	x			x		x							x		x	x	x	x	x		x
Leptoceridae	Amazonatolica	hamadae		x			x				x									x
Leptoceridae	Atanatolica	bonita									x
Leptoceridae	Atanatolica	brasiliana																						x	x
Leptoceridae	Atanatolica	flinti																						x
Leptoceridae	Atanatolica	nordestina										x
Leptoceridae	Grumichella	aequiunguis																					x			x		x
Leptoceridae	Grumichella	boraceia																					x		x
Leptoceridae	Grumichella	jureia																							x
Leptoceridae	Grumichella	leccii																							x
Leptoceridae	Grumichella	muelleri																										x
Leptoceridae	Grumichella	paprockii																					x
Leptoceridae	Grumichella	parati																					x
Leptoceridae	Grumichella	rostrata									x												x	x	x			x
Leptoceridae	Nectopsyche	acutiloba																					x
Leptoceridae	Nectopsyche	adusta																							x
Leptoceridae	Nectopsyche	aureovittata																					x	x	x	x		x
Leptoceridae	Nectopsyche	bella																										x
Leptoceridae	Nectopsyche	bruchi																					x	x		x
Leptoceridae	Nectopsyche	brunneofascia																					x		x			x
Leptoceridae	Nectopsyche	diminuta		x		x		x
Leptoceridae	Nectopsyche	flavofasciata																					x		x			x
Leptoceridae	Nectopsyche	fuscomaculata									x				x								x	x	x	x		x
Leptoceridae	Nectopsyche	gemma																					x					x
Leptoceridae	Nectopsyche	gemmoides																					x		x
Leptoceridae	Nectopsyche	jenseni		x
Leptoceridae	Nectopsyche	maculipennis																					x
Leptoceridae	Nectopsyche	modesta																										x
Leptoceridae	Nectopsyche	muelleri																										x
Leptoceridae	Nectopsyche	muhni						x					x										x	x	x
Leptoceridae	Nectopsyche	multilineata						x
Leptoceridae	Nectopsyche	navasi																										x
Leptoceridae	Nectopsyche	nigricapilla																		x
Leptoceridae	Nectopsyche	ortizi				x																	x	x		x
Leptoceridae	Nectopsyche	pantosticta																					x	x	x		x
Leptoceridae	Nectopsyche	punctata				x		x					x										x	x	x
Leptoceridae	Nectopsyche	quatourguttata											x							x
Leptoceridae	Nectopsyche	separata																					x	x	x	x		x
Leptoceridae	Nectopsyche	splendida						x			x		x			x							x			x
Leptoceridae	Neoathripsodes	anomalus																					x	x	x
Leptoceridae	Neoathripsodes	holzenthali									x
Leptoceridae	Notalina	brasiliana																					x
Leptoceridae	Notalina	cipo									x												x
Leptoceridae	Notalina	franciscana																					x
Leptoceridae	Notalina	froehlichi																					x
Leptoceridae	Notalina	goianensis																	x
Leptoceridae	Notalina	hamiltoni																					x	x	x
Leptoceridae	Notalina	jordanensis																					x		x
Leptoceridae	Notalina	morsei																					x	x	x
Leptoceridae	Notalina	paulista																					x	x	x
Leptoceridae	Oecetis	acanthostema									x
Leptoceridae	Oecetis	acuticlasper																					x	x
Leptoceridae	Oecetis	amazonica		x							x										x				x
Leptoceridae	Oecetis	angelae																			x
Leptoceridae	Oecetis	blahniki		x
Leptoceridae	Oecetis	calori																					x
Leptoceridae	Oecetis	carinata																							x
Leptoceridae	Oecetis	cassicoleata									x
Leptoceridae	Oecetis	catagua																					x
Leptoceridae	Oecetis	clavicornia									x
Leptoceridae	Oecetis	connata		x		x					x					x				x				x	x
Leptoceridae	Oecetis	danielae		x
Leptoceridae	Oecetis	doesburgi		x
Leptoceridae	Oecetis	dominguezi		x
Leptoceridae	Oecetis	excisa				x					x	x	x	x	x		x		x	x	x				x
Leptoceridae	Oecetis	fibra										x										x	x	x	x	x		x
Leptoceridae	Oecetis	flinti							x
Leptoceridae	Oecetis	froehlichi									x
Leptoceridae	Oecetis	furcata									x
Leptoceridae	Oecetis	gibbosa		x
Leptoceridae	Oecetis	iara																								x
Leptoceridae	Oecetis	iguazu									x											x	x	x	x	x		x
Leptoceridae	Oecetis	inconspicua		x							x			x	x	x							x		x	x
Leptoceridae	Oecetis	knutsoni		x																			x
Leptoceridae	Oecetis	machaera		x
Leptoceridae	Oecetis	martinae									x												x
Leptoceridae	Oecetis	paranensis									x				x						x		x		x
Leptoceridae	Oecetis	pertica		x
Leptoceridae	Oecetis	punctipennis				x		x			x	x	x		x								x	x	x
Leptoceridae	Oecetis	rafaeli						x
Leptoceridae	Triplectides	cipo											x										x
Leptoceridae	Triplectides	egleri		x		x
Leptoceridae	Triplectides	gracilis									x											x	x	x	x	x		x
Leptoceridae	Triplectides	itatiaia																						x
Leptoceridae	Triplectides	maranhensis											x
Leptoceridae	Triplectides	misionensis																					x	x	x	x		x
Leptoceridae	Triplectides	neotropicus																					x	x	x
Leptoceridae	Triplectides	ultimus																					x	x
Limnephilidae	Antarctoecia	brasiliensis																					x
Odontoceridae	Anastomoneura	guahybae																					x
Odontoceridae	Barypenthus	concolor									x												x	x	x
Odontoceridae	Marilia	aiuruoca																					x	x
Odontoceridae	Marilia	alata		x											x
Odontoceridae	Marilia	albicornis																							x
Odontoceridae	Marilia	caramuru											x
Odontoceridae	Marilia	elongata																					x
Odontoceridae	Marilia	fasciculata					x								x
Odontoceridae	Marilia	flexuosa										x																x
Odontoceridae	Marilia	guaira						x					x						x
Odontoceridae	Marilia	huamantincoae																						x
Odontoceridae	Marilia	infundibulum																										x
Odontoceridae	Marilia	lateralis																			x
Odontoceridae	Marilia	mahedae						x
Odontoceridae	Marilia	major																					x	x		x		x
Odontoceridae	Marilia	minor																					x	x				x
Odontoceridae	Marilia	paraguassu											x
Odontoceridae	Marilia	sioli		x
Odontoceridae	Marilia	truncata																					x
Philopotamidae	Alterosa	affinis																				x	x
Philopotamidae	Alterosa	amadoi									x
Philopotamidae	Alterosa	bandeira																				x	x
Philopotamidae	Alterosa	beckeri																					x	x
Philopotamidae	Alterosa	bilanceolata																								x
Philopotamidae	Alterosa	bocainae																							x
Philopotamidae	Alterosa	boraceiae																							x
Philopotamidae	Alterosa	caissara																							x
Philopotamidae	Alterosa	caparaonensis																				x	x
Philopotamidae	Alterosa	capixaba																				x
Philopotamidae	Alterosa	castroalvesi									x
Philopotamidae	Alterosa	catarinae																										x
Philopotamidae	Alterosa	caymmii									x
Philopotamidae	Alterosa	escova																						x	x
Philopotamidae	Alterosa	falcata																					x	x	x
Philopotamidae	Alterosa	fimbriata																						x
Philopotamidae	Alterosa	flinti																				x	x	x
Philopotamidae	Alterosa	fluminensis																						x
Philopotamidae	Alterosa	graciosa																								x
Philopotamidae	Alterosa	guapimirim																						x
Philopotamidae	Alterosa	holzenthali																										x
Philopotamidae	Alterosa	inappendiculata																								x
Philopotamidae	Alterosa	intervales																							x	x
Philopotamidae	Alterosa	itatiaiae																						x
Philopotamidae	Alterosa	jordanensis																							x
Philopotamidae	Alterosa	marinonii																							x	x
Philopotamidae	Alterosa	morato																								x
Philopotamidae	Alterosa	nessimiani																						x
Philopotamidae	Alterosa	orgaosensis																						x
Philopotamidae	Alterosa	paprockii																					x
Philopotamidae	Alterosa	paranaensis																								x
Philopotamidae	Alterosa	polyacinata																				x
Philopotamidae	Alterosa	ruschii																				x
Philopotamidae	Alterosa	sanctaeteresae																				x
Philopotamidae	Alterosa	sanctipauli																							x
Philopotamidae	Alterosa	schadrackorum																										x
Philopotamidae	Alterosa	spiesae																							x
Philopotamidae	Alterosa	tripuiensis																					x
Philopotamidae	Alterosa	truncata																				x	x	x	x
Philopotamidae	Chimarra	adamsae				x																	x		x	x
Philopotamidae	Chimarra	akantha		x
Philopotamidae	Chimarra	anticheira									x
Philopotamidae	Chimarra	aurivittata		x			x
Philopotamidae	Chimarra	beckeri																				x	x	x	x
Philopotamidae	Chimarra	bidens											x
Philopotamidae	Chimarra	boraceia																							x
Philopotamidae	Chimarra	brasiliana																								x		x
Philopotamidae	Chimarra	burmeisteri																						x
Philopotamidae	Chimarra	calori										x											x		x
Philopotamidae	Chimarra	camella																					x	x	x
Philopotamidae	Chimarra	camposae																					x
Philopotamidae	Chimarra	camura																						x	x
Philopotamidae	Chimarra	centrispina																					x
Philopotamidae	Chimarra	chela		x
Philopotamidae	Chimarra	cipoensis																					x
Philopotamidae	Chimarra	conica					x				x	x							x	x		x	x	x				x
Philopotamidae	Chimarra	cultellata		x		x	x					x											x	x				x	x
Philopotamidae	Chimarra	curvipenis																					x
Philopotamidae	Chimarra	diaksis		x				x
Philopotamidae	Chimarra	donamariae				x
Philopotamidae	Chimarra	fittkaui		x				x
Philopotamidae	Chimarra	froehlichi																				x	x	x	x
Philopotamidae	Chimarra	gondela						x
Philopotamidae	Chimarra	guyanensis						x
Philopotamidae	Chimarra	heligma																					x
Philopotamidae	Chimarra	heppneri		x									x
Philopotamidae	Chimarra	hyoeides				x									x							x			x			x
Philopotamidae	Chimarra	jugescens		x		x							x
Philopotamidae	Chimarra	kontilos									x											x	x	x	x
Philopotamidae	Chimarra	latiforceps																					x		x
Philopotamidae	Chimarra	machadoi																	x
Philopotamidae	Chimarra	majuscula																						x	x
Philopotamidae	Chimarra	medioloba		x
Philopotamidae	Chimarra	mesodonta									x
Philopotamidae	Chimarra	morio									x													x	x	x		x
Philopotamidae	Chimarra	odonta									x											x	x	x	x
Philopotamidae	Chimarra	parana													x				x			x	x	x	x			x	x
Philopotamidae	Chimarra	paucispina		x
Philopotamidae	Chimarra	petersorum																								x
Philopotamidae	Chimarra	petricola																						x
Philopotamidae	Chimarra	plaumanni																				x						x
Philopotamidae	Chimarra	quaternaria		x
Philopotamidae	Chimarra	scopuloides				x	x	x											x									x
Philopotamidae	Chimarra	simpliciforma		x
Philopotamidae	Chimarra	singularis		x
Philopotamidae	Chimarra	teresae																				x	x	x	x			x
Philopotamidae	Chimarra	tortuosa		x
Philopotamidae	Chimarra	tucuna		x
Philopotamidae	Chimarra	uara		x		x	x	x							x								x					x	x
Philopotamidae	Chimarra	usitatissima		x		x	x	x					x							x			x
Philopotamidae	Chimarra	xingu				x
Philopotamidae	Chimarra	ypsilon																					x	x		x		x
Philopotamidae	Wormaldia	planae		x				x
Polycentropodidae	Cernotina	abreviatta				x
Polycentropodidae	Cernotina	acalyptra		x
Polycentropodidae	Cernotina	anhanguera																	x
Polycentropodidae	Cernotina	antonina													x							x	x			x
Polycentropodidae	Cernotina	aruma		x
Polycentropodidae	Cernotina	attenuata		x
Polycentropodidae	Cernotina	bibrachiata		x
Polycentropodidae	Cernotina	bispicata																	x
Polycentropodidae	Cernotina	cacha		x																			x
Polycentropodidae	Cernotina	cingulata		x
Polycentropodidae	Cernotina	compressa		x
Polycentropodidae	Cernotina	cygnea		x
Polycentropodidae	Cernotina	cystophora		x
Polycentropodidae	Cernotina	declinata				x
Polycentropodidae	Cernotina	decumbens		x
Polycentropodidae	Cernotina	ecotura						x
Polycentropodidae	Cernotina	encrypta		x
Polycentropodidae	Cernotina	falcata																	x
Polycentropodidae	Cernotina	filiformis		x
Polycentropodidae	Cernotina	flexuosa		x
Polycentropodidae	Cernotina	lanceolata																				x
Polycentropodidae	Cernotina	lazzarii																								x
Polycentropodidae	Cernotina	lobisomem		x
Polycentropodidae	Cernotina	longispina									x											x
Polycentropodidae	Cernotina	mandeba						x
Polycentropodidae	Cernotina	obliqua		x
Polycentropodidae	Cernotina	odonta		x
Polycentropodidae	Cernotina	perpendicularis		x		x																	x
Polycentropodidae	Cernotina	pesae		x
Polycentropodidae	Cernotina	puri																						x
Polycentropodidae	Cernotina	sexpinosa																										x
Polycentropodidae	Cernotina	sinuosa																				x
Polycentropodidae	Cernotina	spinigera				x		x											x
Polycentropodidae	Cernotina	spinosior						x
Polycentropodidae	Cernotina	subapicalis		x
Polycentropodidae	Cernotina	trispina		x
Polycentropodidae	Cernotina	uara		x
Polycentropodidae	Cernotina	unguiculata				x
Polycentropodidae	Cernotina	verticalis		x
Polycentropodidae	Cyrnellus	arotron		x		x							x								x
Polycentropodidae	Cyrnellus	bifidus		x																	x
Polycentropodidae	Cyrnellus	collaris		x
Polycentropodidae	Cyrnellus	fraternus		x		x					x		x			x				x	x	x	x	x		x		x
Polycentropodidae	Cyrnellus	mammillatus		x		x		x					x		x						x		x	x	x	x
Polycentropodidae	Cyrnellus	rianus											x
Polycentropodidae	Cyrnellus	risi		x		x																x	x
Polycentropodidae	Cyrnellus	ulmeri		x		x
Polycentropodidae	Nyctiophylax	neotropicalis		x		x									x							x	x	x		x
Polycentropodidae	Polycentropus	acinaciformis																					x
Polycentropodidae	Polycentropus	amphirhamphus																						x	x			x
Polycentropodidae	Polycentropus	ancistrus																							x
Polycentropodidae	Polycentropus	boraceia																							x
Polycentropodidae	Polycentropus	brevicornutus									x
Polycentropodidae	Polycentropus	caaete																							x	x		x
Polycentropodidae	Polycentropus	cachoeira																										x
Polycentropodidae	Polycentropus	carioca																						x
Polycentropodidae	Polycentropus	carolae																						x
Polycentropodidae	Polycentropus	cheliceratus																						x
Polycentropodidae	Polycentropus	cipoensis																					x		x
Polycentropodidae	Polycentropus	fluminensis																				x	x	x
Polycentropodidae	Polycentropus	froehlichi																										x
Polycentropodidae	Polycentropus	galharda																							x
Polycentropodidae	Polycentropus	graciosa																								x
Polycentropodidae	Polycentropus	inusitatus																					x	x
Polycentropodidae	Polycentropus	itatiaia																					x	x
Polycentropodidae	Polycentropus	minero																					x
Polycentropodidae	Polycentropus	paprockii																					x
Polycentropodidae	Polycentropus	rosalysae																					x	x	x
Polycentropodidae	Polycentropus	santateresae																				x	x
Polycentropodidae	Polycentropus	soniae																								x
Polycentropodidae	Polycentropus	tripui																					x
Polycentropodidae	Polycentropus	urubici																					x			x		x
Polycentropodidae	Polycentropus	verruculus																					x		x
Polycentropodidae	Polycentropus	virginae																					x
Polycentropodidae	Polyplectropus	alatespinus																					x	x	x
Polycentropodidae	Polyplectropus	alleni																					x
Polycentropodidae	Polyplectropus	anchorus									x
Polycentropodidae	Polyplectropus	annulicornis																						x		x	x	x
Polycentropodidae	Polyplectropus	auriplicatus									x
Polycentropodidae	Polyplectropus	banksianus		x
Polycentropodidae	Polyplectropus	brachyscolus		x
Polycentropodidae	Polyplectropus	brasilensis																						x	x
Polycentropodidae	Polyplectropus	canastra																					x
Polycentropodidae	Polyplectropus	dubitatus																					x			x		x
Polycentropodidae	Polyplectropus	elongatus																					x			x		x
Polycentropodidae	Polyplectropus	flavicornis																					x
Polycentropodidae	Polyplectropus	fuscatus																										x
Polycentropodidae	Polyplectropus	gaesum																					x
Polycentropodidae	Polyplectropus	hamulus											x
Polycentropodidae	Polyplectropus	hollyae																					x
Polycentropodidae	Polyplectropus	hystricosus																					x	x
Polycentropodidae	Polyplectropus	inarmatus		x									x
Polycentropodidae	Polyplectropus	juliae																					x
Polycentropodidae	Polyplectropus	matatlanticus																					x		x
Polycentropodidae	Polyplectropus	minesium																					x
Polycentropodidae	Polyplectropus	novafriburgensis																						x
Polycentropodidae	Polyplectropus	petrae																					x
Polycentropodidae	Polyplectropus	pratherae																					x
Polycentropodidae	Polyplectropus	profaupar																					x			x		x
Polycentropodidae	Polyplectropus	rodmani																							x
Polycentropodidae	Polyplectropus	rondoniensis					x
Polycentropodidae	Polyplectropus	spiculifer		x
Polycentropodidae	Polyplectropus	tepequemensis						x
Polycentropodidae	Polyplectropus	tragularius									x											x	x		x
Polycentropodidae	Polyplectropus	ulmeriana																										x
Sericostomatidae	Grumicha	grumicha																							x			x
Sericostomatidae	Notidobiella	amazoniana		x
Sericostomatidae	Notidobiella	brasiliana																							x
Xiphocentronidae	Machairocentron	falciforme		x
Xiphocentronidae	Xiphocentron	acqualume																					x
Xiphocentronidae	Xiphocentron	copacabana																						x
Xiphocentronidae	Xiphocentron	ilionea																						x	x
Xiphocentronidae	Xiphocentron	jaguare																					x
Xiphocentronidae	Xiphocentron	kamakan									x
Xiphocentronidae	Xiphocentron	maiteae									x
Xiphocentronidae	Xiphocentron	maracanan																						x
Xiphocentronidae	Xiphocentron	redentor																						x
Xiphocentronidae	Xiphocentron	saltuum																										x
Xiphocentronidae	Xiphocentron	sclerothrix		x	x			x
Xiphocentronidae	Xiphocentron	steffeni																					x	x	x
Xiphocentronidae	Xiphocentron	tijuca																						x
incertae sedis	Eutonella	peltopsychodes																										x
